# Supplementary material for: AXL-associated tumor inflammation as a poor prognostic signature in chemotherapy-treated triple-negative breast cancer patients
Source: PubMed Central journal article supplement (PMC5515347; doi:10.1038/npjbcancer.2016.33), 2016-11-02
Supplement: npjbcancer201633-s2.pdf [file npjbcancer201633-s2.pdf]

**Supplementary Table 1.** Patient characteristics.

| <i>Clinical and pathological information</i> | <i>Discovery cohorts</i> |                             |             |                | <i>Validation cohorts</i>   |                        |
|----------------------------------------------|--------------------------|-----------------------------|-------------|----------------|-----------------------------|------------------------|
|                                              | <i>Internal cohort</i>   | <i>Affymetrix data sets</i> |             |                | <i>Affymetrix data sets</i> | <i>Internal cohort</i> |
|                                              |                          | <i>Hatziz</i>               | <i>IGR</i>  | <i>MAQC-II</i> |                             |                        |
| <i>Patients (N)</i>                          | 203                      | 198                         | 29          | 84             | 137                         | 95                     |
| <i>Median age, years (IQR)</i>               | 50 (46-68)               | 48.2 (25-75)                | 49 (33-67)  | 50 (29-75)     | -                           | 51 (46-66)             |
| <i>Median tumor size, mm (IQR)</i>           | 19 (15-32)               | -                           | 60 (20-175) | -              | -                           | 20 (9.5-30)            |
| <i>T stage</i>                               |                          |                             |             |                |                             |                        |
| T1                                           | 51.2%                    | 6.6%                        | 3.5%        | 13.1%          | -                           | 45.3%                  |
| T2                                           | 36.4%                    | 47.0%                       | 31.0%       | 38.1%          | -                           | 41.0%                  |
| T3                                           | 8.0%                     | 32.8%                       | 65.5%       | 22.6%          | -                           | 8.4%                   |
| T4                                           | 3.9%                     | 13.1%                       | 0.0%        | 21.4%          | -                           | 5.3%                   |
| Unknown                                      | 0.5%                     | 0.5%                        | 0.0%        | 4.8%           | -                           | 0.0%                   |
| <i>TNM Stage</i>                             |                          |                             |             |                |                             |                        |
| I-II                                         | 67.0%                    | 52.5%                       | 58.6%       | 45.2%          | -                           | 58.9%                  |
| III                                          | 33.0%                    | 46.5%                       | 41.4%       | 50.0%          | -                           | 41.1%                  |
| Unknown                                      | 0.0%                     | 1.0%                        | 0.0%        | 4.8%           | -                           | 0.0%                   |
| <i>Node status</i>                           |                          |                             |             |                |                             |                        |
| Negative                                     | 46.3%                    | 27.3%                       | 34.5%       | 19.0%          | 32.8%                       | 45.3%                  |
| Positive                                     | 53.7%                    | 72.7%                       | 65.5%       | 79.8%          | 32.8%                       | 54.7%                  |
| Unknown                                      | 0.0%                     | 0.0%                        | 0.0%        | 1.2%           | 34.4%                       | 0.0%                   |
| <i>Histological grade</i>                    |                          |                             |             |                |                             |                        |
| grade 1                                      | 1.0%                     | 0.5%                        | 0.0%        | 0.0%           | 2.2%                        | 2.1%                   |
| grade 2                                      | 22.7%                    | 12.7%                       | 13.8%       | 17.9%          | 8.0%                        | 20.0%                  |
| grade 3                                      | 76.3%                    | 78.2%                       | 75.9%       | 72.6%          | 65.7%                       | 77.9%                  |
| Unknown                                      |                          | 8.6%                        | 10.3%       | 9.5%           | 24.1%                       |                        |
| <i>Lymphovascular invasion</i>               |                          |                             |             |                |                             |                        |
| Absent                                       | 32.0%                    | -                           | -           | -              | -                           | 44.2%                  |
| Present                                      | 18.7%                    | -                           | -           | -              | -                           | 34.7%                  |
| Unknown                                      | 49.3%                    | -                           | -           | -              | -                           | 21.1%                  |
| <i>Recurrence within 36 months</i>           |                          |                             |             |                |                             |                        |
| Yes                                          | 19.7%                    | -                           | -           | -              | 29.9%                       | 18.9%                  |
| No                                           | 80.3%                    | -                           | -           | -              | 70.1%                       | 81.1%                  |
| <i>Site of first distant recurrence</i>      |                          |                             |             |                |                             |                        |
| Bone                                         | 17.0%                    | -                           | -           | -              | -                           | 19.0%                  |
| Visceral                                     | 53.2%                    | -                           | -           | -              | -                           | 61.9%                  |
| Unknown                                      | 29.8%                    |                             |             |                | -                           | 19.1%                  |
| <i>Death of Breast cancer</i>                |                          |                             |             |                |                             |                        |
| Yes                                          | 19.7%                    | -                           | -           | -              | -                           | 20.0%                  |
| No                                           | 78.3%                    | -                           | -           | -              | -                           | 80.0%                  |
| Unknown                                      | 2.0%                     | -                           | -           | -              | -                           | 0.0%                   |

|                            |          |          |          |                                                                                                              |
|----------------------------|----------|----------|----------|--------------------------------------------------------------------------------------------------------------|
| <b>Series accession no</b> | GSE25066 | GSE22093 | GSE20194 | GSE3494,<br>GSE4611,<br>GSE5327,<br>GSE1456,<br>GSE19615,<br>GSE21653,<br>GSE31519,<br>GSE37946,<br>GSE45255 |
|----------------------------|----------|----------|----------|--------------------------------------------------------------------------------------------------------------|

---

Abbreviations: IQR, Interquartile range.

**Supplementary Table 2.** Correlations between CD68 protein expression and gene expression of the 30 most relevant EMT-associated kinases in-triple negative breast cancer (N = 203).

| <b>CD68 protein expression</b> |                                         |                            |                            |  |
|--------------------------------|-----------------------------------------|----------------------------|----------------------------|--|
| <i>EMT-associated kinases</i>  | <i>Spearman correlation coefficient</i> | <i>P-value<sup>a</sup></i> | <i>P-value<sup>b</sup></i> |  |
| <i>AKT1</i>                    | 0.173                                   | <b>1.37E-02</b>            | 3.43E-01                   |  |
| <i>AKT2</i>                    | -0.086                                  | 2.24E-01                   | 2.47E+00                   |  |
| <i>AXL</i>                     | 0.405                                   | <b>&lt; 1.00E-04</b>       | <b>7.10E-03</b>            |  |
| <i>DDR1</i>                    | 0.048                                   | 4.98E-01                   | 3.85E+00                   |  |
| <i>DDR2</i>                    | 0.131                                   | 6.25E-02                   | 1.06E+00                   |  |
| <i>EGFR</i>                    | 0.03                                    | 6.67E-01                   | 3.85E+00                   |  |
| <i>ERK1</i>                    | -0.125                                  | 7.55E-02                   | 1.13E+00                   |  |
| <i>ERK2</i>                    | 0.171                                   | <b>1.47E-02</b>            | 3.53E-01                   |  |
| <i>FAK</i>                     | 0.177                                   | <b>1.18E-02</b>            | 3.19E-01                   |  |
| <i>FGFR1</i>                   | 0.183                                   | <b>9.00E-03</b>            | 2.52E-01                   |  |
| <i>FGFR2</i>                   | 0.162                                   | <b>2.08E-02</b>            | 4.38E-01                   |  |
| <i>FGFR3</i>                   | 0.13                                    | 6.36E-02                   | 1.06E+00                   |  |
| <i>FYN</i>                     | 0.154                                   | <b>2.81E-02</b>            | 5.32E-01                   |  |
| <i>GSK3B</i>                   | -0.005                                  | 9.47E-01                   | 3.85E+00                   |  |
| <i>IGF1R</i>                   | 0.006                                   | 9.34E-01                   | 3.85E+00                   |  |
| <i>IKKA</i>                    | 0.156                                   | <b>2.59E-02</b>            | 5.18E-01                   |  |
| <i>IKKB</i>                    | 0.163                                   | <b>1.99E-02</b>            | 4.38E-01                   |  |
| <i>LYN</i>                     | 0.174                                   | <b>1.32E-02</b>            | 3.43E-01                   |  |
| <i>MET</i>                     | 0.052                                   | 4.63E-01                   | 3.85E+00                   |  |
| <i>PDGFRA</i>                  | -0.091                                  | 1.97E-01                   | 2.36E+00                   |  |
| <i>PDGFRB</i>                  | -0.026                                  | 7.15E-01                   | 3.85E+00                   |  |
| <i>PTK2B</i>                   | -0.064                                  | 3.65E-01                   | 3.65E+00                   |  |
| <i>SRC</i>                     | 0.056                                   | 4.28E-01                   | 3.85E+00                   |  |
| <i>SYK</i>                     | -0.097                                  | 1.67E-01                   | 2.16E+00                   |  |
| <i>TGFBR1</i>                  | -0.03                                   | 6.71E-01                   | 3.85E+00                   |  |
| <i>TGFBR2</i>                  | 0.168                                   | <b>1.69E-02</b>            | 3.89E-01                   |  |
| <i>VEGFR1</i>                  | 0.043                                   | 5.43E-01                   | 3.85E+00                   |  |
| <i>VEGFR2</i>                  | 0.111                                   | 1.17E-01                   | 1.63E+00                   |  |
| <i>VEGFR3</i>                  | 0.207                                   | <b>3.10E-03</b>            | 8.99E-02                   |  |
| <i>YES1</i>                    | 0.154                                   | <b>2.80E-02</b>            | 5.32E-01                   |  |

Significant *P*-values are given in bold.

<sup>a</sup>Spearman Rank correlation *P*-values.

<sup>b</sup>*P*-values corrected for multiple-testing error by the Bonferroni method.

**Supplementary Table 3.** SEEK analysis for the enrichment of genes co-expressed with *AXL* in triple negative breast cancer.

| <i>Gene ontology biological process</i>         | <b>P-value<sup>a</sup></b> | <b>q value<sup>b</sup></b> |
|-------------------------------------------------|----------------------------|----------------------------|
| Extracellular matrix organization               | 4.54E-18                   | 3.88E-17                   |
| Cell migration                                  | 9.99E-14                   | 6.36E-13                   |
| Collagen metabolic process                      | 9.99E-14                   | 2.51E-12                   |
| Extracellular matrix disassembly                | 2.53E-13                   | 9.73E-12                   |
| Collagen catabolic process                      | 6.27E-13                   | 3.20E-11                   |
| Cell adhesion                                   | 2.27E-10                   | 1.52E-09                   |
| Positive regulation of immune system process    | 2.97E-10                   | 2.11E-09                   |
| Collagen fibril organization                    | 2.97E-10                   | 2.86E-09                   |
| Regulation of cell migration                    | 5.17E-10                   | 6.26E-09                   |
| Regulation of cell motility                     | 5.37E-10                   | 6.26E-09                   |
| Regulation of cellular component movement       | 1.14E-09                   | 1.17E-08                   |
| Leukocyte migration                             | 3.29E-09                   | 5.39E-08                   |
| Activation of immune response                   | 3.19E-08                   | 3.19E-07                   |
| Wound healing                                   | 8.34E-08                   | 5.19E-07                   |
| Positive regulation of locomotion               | 8.34E-08                   | 5.19E-07                   |
| Hemostasis                                      | 8.64E-08                   | 5.85E-07                   |
| Cell activation                                 | 8.64E-08                   | 5.85E-07                   |
| Blood coagulation                               | 1.92E-07                   | 1.32E-06                   |
| Positive regulation of cell motility            | 1.92E-07                   | 1.38E-06                   |
| Cell chemotaxis                                 | 2.98E-07                   | 2.72E-06                   |
| Positive regulation of cell migration           | 2.98E-07                   | 3.50E-06                   |
| Chemotaxis                                      | 6.75E-07                   | 5.01E-06                   |
| Complement activation                           | 6.75E-07                   | 6.83E-06                   |
| Cardiovascular system development               | 8.89E-07                   | 9.08E-06                   |
| Blood vessel development                        | 1.47E-06                   | 2.32E-05                   |
| Platelet activation                             | 2.09E-06                   | 3.23E-05                   |
| Protein activation cascade                      | 2.09E-06                   | 3.37E-05                   |
| Humoral immune response                         | 2.09E-06                   | 5.71E-05                   |
| Regulation of response to external stimulus     | 7.78E-06                   | 1.12E-04                   |
| Positive regulation of cell proliferation       | 1.46E-05                   | 1.34E-04                   |
| Regulation of protein processing                | 1.46E-05                   | 2.06E-04                   |
| Cell morphogenesis involved in differentiation  | 2.79E-05                   | 2.37E-04                   |
| Leukocyte chemotaxis                            | 2.79E-05                   | 3.04E-04                   |
| Positive regulation of fibroblast proliferation | 2.79E-05                   | 3.58E-04                   |
| Collagen biosynthetic process                   | 2.79E-05                   | 3.63E-04                   |
| Regulation of smooth muscle cell migration      | 2.79E-05                   | 3.63E-04                   |
| Cell substrate adhesion                         | 2.79E-05                   | 5.12E-04                   |
| Cell morphogenesis                              | 9.61E-05                   | 6.17E-04                   |
| Immune effector process                         | 9.61E-05                   | 6.26E-04                   |
| Regulation of leukocyte migration               | 9.61E-05                   | 6.65E-04                   |
| Inflammatory response                           | 9.61E-05                   | 6.77E-04                   |
| Platelet degranulation                          | 9.61E-05                   | 8.26E-04                   |

|                                                                          |          |          |
|--------------------------------------------------------------------------|----------|----------|
| Regulation of chemotaxis                                                 | 9.61E-05 | 8.87E-04 |
| Immunoglobulin mediated immune response                                  | 9.61E-05 | 1.04E-03 |
| Immune response regulating signaling pathway                             | 1.22E-04 | 1.05E-03 |
| Skeletal system development                                              | 1.22E-04 | 1.05E-03 |
| Response to ketone                                                       | 1.22E-04 | 1.89E-03 |
| Negative regulation of immune system process                             | 1.22E-04 | 2.01E-03 |
| Regulation of cell activation                                            | 1.39E-04 | 2.59E-03 |
| Positive regulation of chemotaxis                                        | 1.39E-04 | 2.59E-03 |
| Positive regulation of leukocyte activation                              | 1.39E-04 | 2.70E-03 |
| Blood vessel morphogenesis                                               | 1.59E-04 | 2.70E-03 |
| Negative regulation of cell proliferation                                | 3.29E-04 | 3.28E-03 |
| Regulation of leukocyte activation                                       | 3.29E-04 | 3.58E-03 |
| Regulation of leukocyte chemotaxis                                       | 3.29E-04 | 3.58E-03 |
| Regulation of multicellular organismal development                       | 5.03E-04 | 3.79E-03 |
| Regulation of epithelial to mesenchymal transition                       | 5.03E-04 | 4.02E-03 |
| Positive regulation of lymphocyte activation                             | 5.03E-04 | 4.14E-03 |
| Regulation of lymphocyte activation                                      | 5.03E-04 | 4.22E-03 |
| Positive regulation of developmental process                             | 5.03E-04 | 4.22E-03 |
| Cellular component disassembly                                           | 5.03E-04 | 4.50E-03 |
| Transmembrane receptor protein serine threonine kinase signaling pathway | 5.03E-04 | 4.54E-03 |
| Mesenchyme development                                                   | 5.03E-04 | 4.92E-03 |
| Regulation of complement activation                                      | 5.03E-04 | 5.49E-03 |
| Epithelial to mesenchymal transition                                     | 5.03E-04 | 5.74E-03 |
| Positive regulation of cell differentiation                              | 5.03E-04 | 5.74E-03 |
| Regulation of anatomical structure morphogenesis                         | 5.03E-04 | 5.74E-03 |
| Stem cell development                                                    | 5.03E-04 | 5.74E-03 |
| Protein processing                                                       | 5.03E-04 | 5.74E-03 |
| Platelet derived growth factor receptor signaling pathway                | 5.03E-04 | 6.62E-03 |
| Positive regulation of response to external stimulus                     | 5.03E-04 | 6.98E-03 |
| Leukocyte activation                                                     | 5.39E-04 | 7.04E-03 |
| Regulation of leukocyte proliferation                                    | 5.39E-04 | 7.36E-03 |
| Angiogenesis                                                             | 5.39E-04 | 7.77E-03 |
| Antigen receptor mediated signaling pathway                              | 5.39E-04 | 7.77E-03 |
| Proteoglycan biosynthetic process                                        | 5.39E-04 | 7.77E-03 |
| Regulation of stem cell differentiation                                  | 5.39E-04 | 7.77E-03 |
| Negative regulation of signaling                                         | 1.13E-03 | 7.77E-03 |
| Macrophage activation                                                    | 1.13E-03 | 7.77E-03 |
| Ovulation cycle                                                          | 1.13E-03 | 7.77E-03 |
| Wnt receptor signaling pathway                                           | 1.13E-03 | 7.77E-03 |
| Immune response regulating cell surface receptor signaling pathway       | 1.13E-03 | 7.77E-03 |
| Regulation of Wnt receptor signaling pathway                             | 1.13E-03 | 7.80E-03 |
| Stem cell differentiation                                                | 1.13E-03 | 8.52E-03 |
| Immune response activating signal transduction                           | 1.13E-03 | 9.10E-03 |
| Chemokine mediated signaling pathway                                     | 1.13E-03 | 9.66E-03 |
| Lymphocyte activation                                                    | 1.13E-03 | 1.11E-02 |
| Negative regulation of canonical Wnt receptor signaling pathway          | 1.13E-03 | 1.18E-02 |

|                                                                                                                           |          |          |
|---------------------------------------------------------------------------------------------------------------------------|----------|----------|
| Proteoglycan metabolic process                                                                                            | 1.13E-03 | 1.23E-02 |
| Axon guidance                                                                                                             | 1.13E-03 | 1.23E-02 |
| Negative regulation of signal transduction                                                                                | 1.75E-03 | 1.25E-02 |
| Regulation of cell differentiation                                                                                        | 2.03E-03 | 1.51E-02 |
| Regulation of defense response                                                                                            | 2.03E-03 | 1.55E-02 |
| Negative regulation of Wnt receptor signaling pathway                                                                     | 2.03E-03 | 1.59E-02 |
| Regulation of lymphocyte proliferation                                                                                    | 2.03E-03 | 1.76E-02 |
| Renal system development                                                                                                  | 2.03E-03 | 1.76E-02 |
| Blood circulation                                                                                                         | 2.03E-03 | 1.80E-02 |
| Regulation of canonical Wnt receptor signaling pathway                                                                    | 2.03E-03 | 1.86E-02 |
| Regulation of cell morphogenesis                                                                                          | 2.03E-03 | 1.93E-02 |
| Cellular response to vascular endothelial growth factor stimulus                                                          | 2.03E-03 | 2.10E-02 |
| Endothelial cell migration                                                                                                | 2.03E-03 | 2.13E-02 |
| Positive regulation of Wnt receptor signaling pathway                                                                     | 2.03E-03 | 2.22E-02 |
| Regulation of granulocyte chemotaxis                                                                                      | 2.03E-03 | 2.31E-02 |
| Negative regulation of developmental process                                                                              | 2.03E-03 | 2.48E-02 |
| Vascular endothelial growth factor receptor signaling pathway                                                             | 2.03E-03 | 3.01E-02 |
| Positive regulation of intracellular protein transport                                                                    | 2.03E-03 | 3.07E-02 |
| Regulation of wound healing                                                                                               | 2.03E-03 | 3.09E-02 |
| Positive regulation of leukocyte chemotaxis                                                                               | 2.03E-03 | 3.10E-02 |
| Regulation of inflammatory response                                                                                       | 2.03E-03 | 3.28E-02 |
| Transforming growth factor beta receptor signaling pathway                                                                | 2.03E-03 | 3.30E-02 |
| Cellular response to transforming growth factor beta stimulus                                                             | 2.03E-03 | 3.30E-02 |
| Organ morphogenesis                                                                                                       | 2.15E-03 | 3.30E-02 |
| Adaptive immune response based on somatic recombination of immune receptors built from immunoglobulin superfamily domains | 2.15E-03 | 3.30E-02 |
| Positive regulation of cell development                                                                                   | 2.15E-03 | 3.30E-02 |
| Positive regulation of intracellular transport                                                                            | 2.15E-03 | 3.70E-02 |
| Canonical Wnt receptor signaling pathway                                                                                  | 2.15E-03 | 3.70E-02 |
| Cell cell adhesion                                                                                                        | 2.38E-03 | 3.99E-02 |
| Exocytosis                                                                                                                | 2.38E-03 | 4.03E-02 |
| Immune response activating cell surface receptor signaling pathway                                                        | 3.68E-03 | 4.20E-02 |
| Negative regulation of leukocyte proliferation                                                                            | 3.68E-03 | 4.36E-02 |
| Regulation of B cell proliferation                                                                                        | 3.68E-03 | 4.36E-02 |
| Regulation of B cell activation                                                                                           | 4.07E-03 | 4.41E-02 |
| Cell matrix adhesion                                                                                                      | 4.07E-03 | 4.41E-02 |
| Anatomical structure formation involved in morphogenesis                                                                  | 4.07E-03 | 4.41E-02 |
| Positive regulation of protein transport                                                                                  | 4.07E-03 | 4.48E-02 |
| Granulocyte chemotaxis                                                                                                    | 4.07E-03 | 4.54E-02 |
| Positive regulation of lymphocyte proliferation                                                                           | 4.07E-03 | 4.54E-02 |
| Morphogenesis of an epithelium                                                                                            | 4.07E-03 | 4.54E-02 |
| Positive regulation of nucleocytoplasmic transport                                                                        | 4.07E-03 | 4.54E-02 |

<sup>a</sup>Benjamini-Hochberg-adjusted.

<sup>b</sup>A threshold  $q$  value  $\leq 0.05$  for the Benjamini-Hochberg false discovery rate was used.

**Supplementary Table 4.** Genes enclosed in the M1 or M2 macrophage modules.

| <i>Gene symbol</i>       | <i>Gene name</i>                                                               |
|--------------------------|--------------------------------------------------------------------------------|
| <i>M1-related module</i> |                                                                                |
| <i>APOL3</i>             | apolipoprotein L, 3                                                            |
| <i>CCL15</i>             | chemokine (C-C motif) ligand 14; chemokine (C-C motif) ligand 15               |
| <i>CCL19</i>             | chemokine (C-C motif) ligand 19                                                |
| <i>CCL20</i>             | chemokine (C-C motif) ligand 20                                                |
| <i>CCL4</i>              | chemokine (C-C motif) ligand 4                                                 |
| <i>CCL5</i>              | chemokine (C-C motif) ligand 5                                                 |
| <i>CCR7</i>              | chemokine (C-C motif) receptor 7                                               |
| <i>CD69</i>              | CD69 molecule                                                                  |
| <i>CD80</i>              | CD80 molecule                                                                  |
| <i>CD86</i>              | CD86 molecule                                                                  |
| <i>CFB</i>               | complement factor B                                                            |
| <i>CXCL1</i>             | chemokine (C-X-C motif) ligand 1 (melanoma growth stimulating activity, alpha) |
| <i>CXCL10</i>            | chemokine (C-X-C motif) ligand 10                                              |
| <i>CXCL11</i>            | chemokine (C-X-C motif) ligand 11                                              |
| <i>CXCL9</i>             | chemokine (C-X-C motif) ligand 9                                               |
| <i>FCGR2A</i>            | Fc fragment of IgG, low affinity IIa, receptor (CD32)                          |
| <i>FCGR3B</i>            | Fc fragment of IgG, low affinity IIIb, receptor (CD16b)                        |
| <i>GBP1</i>              | guanylate binding protein 1, interferon-inducible, 67kDa                       |
| <i>GBP2</i>              | guanylate binding protein 2, interferon-inducible                              |
| <i>GBP3</i>              | guanylate binding protein 3                                                    |
| <i>GBP4</i>              | guanylate binding protein 4                                                    |
| <i>GBP5</i>              | guanylate binding protein 5                                                    |
| <i>HESX1</i>             | HESX homeobox 1                                                                |
| <i>ICAM1</i>             | intercellular adhesion molecule 1                                              |
| <i>IL12B</i>             | interleukin 12B                                                                |
| <i>IL15</i>              | interleukin 15                                                                 |
| <i>IL15RA</i>            | interleukin 15 receptor, alpha                                                 |
| <i>IL18</i>              | interleukin 18                                                                 |
| <i>IL1B</i>              | interleukin 1, beta                                                            |
| <i>IL23A</i>             | interleukin 23, alpha subunit p19                                              |
| <i>IL2RA</i>             | interleukin 2 receptor, alpha                                                  |
| <i>IL32</i>              | interleukin 32                                                                 |
| <i>IL6</i>               | interleukin 6                                                                  |
| <i>IRF1</i>              | interferon regulatory factor 1                                                 |
| <i>IRF7</i>              | interferon regulatory factor 7                                                 |
| <i>PDE4B</i>             | phosphodiesterase 4B, cAMP-specific                                            |
| <i>PTX3</i>              | pentraxin 3, long                                                              |
| <i>SOCS3</i>             | suppressor of cytokine signaling 3                                             |
| <i>TLR2</i>              | toll-like receptor 2                                                           |
| <i>TLR4</i>              | toll-like receptor 4                                                           |
| <i>TNF</i>               | tumor necrosis factor                                                          |
| <i>TNFSF10</i>           | tumor necrosis factor (ligand) superfamily, member 10                          |
| <i>M2-related module</i> |                                                                                |

|               |                                                              |
|---------------|--------------------------------------------------------------|
| <i>ADK</i>    | adenosine kinase                                             |
| <i>ADORA3</i> | adenosine A3 receptor                                        |
| <i>ALOX15</i> | arachidonate 15-lipoxygenase                                 |
| <i>ARG1</i>   | arginase 1                                                   |
| <i>CCL13</i>  | chemokine (C-C motif) ligand 13                              |
| <i>CCL17</i>  | chemokine (C-C motif) ligand 17                              |
| <i>CCL18</i>  | chemokine (C-C motif) ligand 18                              |
| <i>CCL2</i>   | chemokine (C-C motif) ligand 2                               |
| <i>CCL23</i>  | chemokine (C-C motif) ligand 23                              |
| <i>CCL24</i>  | chemokine (C-C motif) ligand 24                              |
| <i>CD163</i>  | CD163 molecule                                               |
| <i>CD36</i>   | CD36 molecule                                                |
| <i>CD9</i>    | CD9 molecule                                                 |
| <i>CERK</i>   | ceramide kinase                                              |
| <i>CHN2</i>   | chimerin 2                                                   |
| <i>COL6A2</i> | collagen, type VI, alpha 2                                   |
| <i>CXCR4</i>  | chemokine (C-X-C motif) receptor 4                           |
| <i>EGR2</i>   | early growth response 2                                      |
| <i>FGL2</i>   | fibrinogen-like 2                                            |
| <i>FNI</i>    | fibronectin 1                                                |
| <i>GAS6</i>   | growth arrest-specific 6                                     |
| <i>GAS7</i>   | growth arrest-specific 7                                     |
| <i>HEXB</i>   | hexosaminidase B                                             |
| <i>HNMT</i>   | histamine N-methyltransferase                                |
| <i>HRH1</i>   | histamine receptor H1                                        |
| <i>HS3ST1</i> | heparan sulfate (glucosamine) 3-O-sulfotransferase 1         |
| <i>IGF1</i>   | insulin-like growth factor 1 (somatomedin C)                 |
| <i>IL10</i>   | interleukin 10                                               |
| <i>IL13</i>   | interleukin 13                                               |
| <i>IL1RN</i>  | interleukin 1 receptor antagonist                            |
| <i>IL4</i>    | interleukin 4                                                |
| <i>IL4R</i>   | interleukin 4 receptor                                       |
| <i>LIPA</i>   | lipase A, lysosomal acid, cholesterol esterase               |
| <i>LTA4H</i>  | leukotriene A4 hydrolase                                     |
| <i>MAF</i>    | v-maf avian musculoaponeurotic fibrosarcoma oncogene homolog |
| <i>MERTK</i>  | MER proto-oncogene, tyrosine kinase                          |
| <i>MRC1</i>   | mannose receptor, C type 1                                   |
| <i>MRC2</i>   | mannose receptor, C type 2                                   |
| <i>MSR1</i>   | macrophage scavenger receptor 1                              |
| <i>SEPP1</i>  | selenoprotein P, plasma, 1                                   |
| <i>TGFB1</i>  | transforming growth factor, beta 1                           |
| <i>TGFBR2</i> | transforming growth factor, beta receptor II                 |
| <i>TLR5</i>   | toll-like receptor 5                                         |
| <i>TPST2</i>  | tyrosylprotein sulfotransferase 2                            |

---



**Supplementary Table 5.** Genes co-expressed with the M1- or M2-related macrophage modules in triple-negative breast cancer.

| <i>Gene symbol</i>       | <i>Co-expression score</i> | <i>P-value</i> | <i>Gene symbol</i>       | <i>Co-expression score</i> | <i>P-value</i> |
|--------------------------|----------------------------|----------------|--------------------------|----------------------------|----------------|
| <i>M1-related module</i> |                            |                | <i>M2-related module</i> |                            |                |
| <i>EPSTI1</i>            | 2.349                      | < 1.00E-04     | <i>C3AR1</i>             | 1.340                      | < 1.00E-04     |
| <i>UBD</i>               | 2.139                      | < 1.00E-04     | <i>MS4A4A</i>            | 1.308                      | < 1.00E-04     |
| <i>CSF2RB</i>            | 2.110                      | < 1.00E-04     | <i>KCTD12</i>            | 1.268                      | < 1.00E-04     |
| <i>TRBV20-1</i>          | 1.741                      | < 1.00E-04     | <i>MAFB</i>              | 1.253                      | < 1.00E-04     |
| <i>TICAM2</i>            | 1.315                      | < 1.00E-04     | <i>SERPINF1</i>          | 1.243                      | < 1.00E-04     |
| <i>C12orf59</i>          | 1.265                      | < 1.00E-04     | <i>TRBV20-1</i>          | 0.915                      | < 1.00E-04     |
| <i>LOC100130633</i>      | 1.129                      | < 1.00E-04     | <i>TICAM2</i>            | 0.735                      | < 1.00E-04     |
| <i>GBP1P1</i>            | 1.108                      | < 1.00E-04     | <i>LOC100130633</i>      | 0.610                      | < 1.00E-04     |
| <i>LOC729839</i>         | 0.725                      | < 1.00E-04     | <i>A2M-AS1</i>           | 0.503                      | < 1.00E-04     |
| <i>A2M-AS1</i>           | 0.598                      | < 1.00E-04     | <i>LOC729839</i>         | 0.340                      | < 1.00E-04     |
| <i>LOC645139</i>         | 0.525                      | < 1.00E-04     | <i>GBP1P1</i>            | 0.267                      | < 1.00E-04     |
| <i>LINC00460</i>         | 0.487                      | < 1.00E-04     | <i>LPP-AS2</i>           | 0.247                      | < 1.00E-04     |
| <i>TRBV7-8</i>           | 0.474                      | < 1.00E-04     | <i>LOC643072</i>         | 0.233                      | < 1.00E-04     |
| <i>LINC00294</i>         | 0.294                      | < 1.00E-04     | <i>LOC100131825</i>      | 0.230                      | < 1.00E-04     |
| <i>ZNF731P</i>           | 0.285                      | < 1.00E-04     | <i>STEAP1B</i>           | 0.215                      | < 1.00E-04     |
| <i>RPL18AP3</i>          | 0.263                      | < 1.00E-04     | <i>LOC100130458</i>      | 0.203                      | < 1.00E-04     |
| <i>LOC100130458</i>      | 0.252                      | < 1.00E-04     | <i>MUC5AC</i>            | 0.200                      | < 1.00E-04     |
| <i>LOC100288675</i>      | 0.241                      | < 1.00E-04     | <i>LINC00294</i>         | 0.197                      | < 1.00E-04     |
| <i>LOC100129637</i>      | 0.238                      | < 1.00E-04     | <i>LOC644456</i>         | 0.175                      | < 1.00E-04     |
| <i>LINC00284</i>         | 0.191                      | < 1.00E-04     | <i>LOC440311</i>         | 0.120                      | < 1.00E-04     |
| <i>LINC00582</i>         | 0.184                      | < 1.00E-04     | <i>LOC100132707</i>      | 0.120                      | < 1.00E-04     |
| <i>FLJ36848</i>          | 0.180                      | < 1.00E-04     | <i>DGCR10</i>            | 0.107                      | < 1.00E-04     |
| <i>TRBV7-3</i>           | 0.171                      | < 1.00E-04     | <i>LOC100131754</i>      | 0.090                      | < 1.00E-04     |
| <i>TMPO-AS1</i>          | 0.167                      | < 1.00E-04     | <i>LOC645139</i>         | 0.065                      | < 1.00E-04     |
| <i>LOC100288525</i>      | 0.115                      | < 1.00E-04     | <i>LOC100288418</i>      | 0.050                      | < 1.00E-04     |
| <i>LOC644589</i>         | 0.100                      | < 1.00E-04     | <i>TRBV7-8</i>           | 0.040                      | < 1.00E-04     |
| <i>MUC5AC</i>            | 0.094                      | < 1.00E-04     | <i>LOC100130111</i>      | 0.033                      | < 1.00E-04     |
| <i>LOC645739</i>         | 0.081                      | < 1.00E-04     | <i>LINC00284</i>         | 0.033                      | < 1.00E-04     |
| <i>LOC145474</i>         | 0.057                      | < 1.00E-04     | <i>ITPK1-AS1</i>         | 0.033                      | < 1.00E-04     |
| <i>FLJ37786</i>          | 0.045                      | < 1.00E-04     | <i>LOC145474</i>         | 0.013                      | < 1.00E-04     |
| <i>LPP-AS2</i>           | 0.041                      | < 1.00E-04     | <i>FLJ16779</i>          | 0.010                      | < 1.00E-04     |
| <i>LOC100132707</i>      | 0.032                      | < 1.00E-04     | <i>CDRT15L2</i>          | -0.010                     | < 1.00E-04     |
| <i>ERLEC1P1</i>          | 0.026                      | < 1.00E-04     | <i>HCG11</i>             | -0.013                     | < 1.00E-04     |
| <i>LOC100131754</i>      | 0.026                      | < 1.00E-04     | <i>TRIM78P</i>           | -0.020                     | < 1.00E-04     |
| <i>LOC644456</i>         | 0.021                      | < 1.00E-04     | <i>LOC401463</i>         | -0.020                     | < 1.00E-04     |
| <i>BLOC1S5</i>           | 0.015                      | < 1.00E-04     | <i>LOC100131261</i>      | -0.020                     | < 1.00E-04     |
| <i>LOC643072</i>         | 0.012                      | < 1.00E-04     | <i>LOC100288675</i>      | -0.025                     | < 1.00E-04     |
| <i>LOC151121</i>         | 0.004                      | < 1.00E-04     | <i>ANKRD34C</i>          | -0.035                     | < 1.00E-04     |
| <i>DGCR10</i>            | -0.006                     | < 1.00E-04     | <i>LOC100288578</i>      | -0.040                     | < 1.00E-04     |
| <i>PAN3-AS1</i>          | -0.013                     | < 1.00E-04     | <i>LINC00293</i>         | -0.047                     | < 1.00E-04     |
| <i>SH3D20</i>            | -0.037                     | < 1.00E-04     | <i>LOC100289058</i>      | -0.050                     | < 1.00E-04     |
| <i>C6orf147</i>          | -0.039                     | < 1.00E-04     | <i>RPL18AP3</i>          | -0.060                     | < 1.00E-04     |
| <i>LOC339535</i>         | -0.055                     | < 1.00E-04     | <i>HMGB3P30</i>          | -0.060                     | < 1.00E-04     |
| <i>LOC100287598</i>      | -0.057                     | < 1.00E-04     | <i>LOC340017</i>         | -0.067                     | < 1.00E-04     |

|                     |        |            |                     |        |            |
|---------------------|--------|------------|---------------------|--------|------------|
| <i>C10orf112</i>    | -0.064 | < 1.00E-04 | <i>PAN3-AS1</i>     | -0.073 | < 1.00E-04 |
| <i>ITPK1-AS1</i>    | -0.065 | < 1.00E-04 | <i>LOC285205</i>    | -0.073 | < 1.00E-04 |
| <i>ANKRD34C</i>     | -0.069 | < 1.00E-04 | <i>LOC201651</i>    | -0.077 | < 1.00E-04 |
| <i>CDRT15L2</i>     | -0.077 | < 1.00E-04 | <i>LOC284632</i>    | -0.093 | < 1.00E-04 |
| <i>KCNU1</i>        | -0.093 | < 1.00E-04 | <i>LOC144438</i>    | -0.095 | < 1.00E-04 |
| <i>ZNF891</i>       | -0.100 | < 1.00E-04 | <i>LOC286367</i>    | -0.100 | < 1.00E-04 |
| <i>LOC440311</i>    | -0.100 | < 1.00E-04 | <i>LOC148824</i>    | -0.103 | < 1.00E-04 |
| <i>LOC100216545</i> | -0.106 | < 1.00E-04 | <i>MUC19</i>        | -0.105 | < 1.00E-04 |
| <i>LOC255167</i>    | -0.106 | < 1.00E-04 | <i>C10orf112</i>    | -0.107 | < 1.00E-04 |
| <i>LINC00323</i>    | -0.118 | < 1.00E-04 | <i>XGPY2</i>        | -0.110 | < 1.00E-04 |
| <i>OSTM1-AS1</i>    | -0.136 | < 1.00E-04 | <i>LOC284551</i>    | -0.113 | < 1.00E-04 |
| <i>LOC116437</i>    | -0.138 | < 1.00E-04 | <i>KRTAP10-12</i>   | -0.120 | < 1.00E-04 |
| <i>C13orf41</i>     | -0.143 | < 1.00E-04 | <i>LOC100287825</i> | -0.125 | < 1.00E-04 |
| <i>ZRANB2-AS1</i>   | -0.145 | < 1.00E-04 | <i>C13orf41</i>     | -0.125 | < 1.00E-04 |
| <i>LOC100289058</i> | -0.146 | < 1.00E-04 | <i>LOC100216545</i> | -0.130 | < 1.00E-04 |
| <i>LOC201651</i>    | -0.146 | < 1.00E-04 | <i>LOC100288152</i> | -0.133 | < 1.00E-04 |
| <i>LINC00493</i>    | -0.147 | < 1.00E-04 | <i>FAM181A-AS1</i>  | -0.133 | < 1.00E-04 |
| <i>ST7-OT4</i>      | -0.152 | < 1.00E-04 | <i>LOC100127886</i> | -0.135 | < 1.00E-04 |
| <i>LOC148824</i>    | -0.154 | < 1.00E-04 | <i>DCLRE1A</i>      | -0.593 | < 1.00E-04 |
| <i>LOC100131261</i> | -0.159 | < 1.00E-04 | <i>ACVR2B</i>       | -0.598 | < 1.00E-04 |
| <i>LOC100288418</i> | -0.164 | < 1.00E-04 | <i>VAPB</i>         | -0.600 | < 1.00E-04 |
| <i>LOC150577</i>    | -0.165 | < 1.00E-04 | <i>TGS1</i>         | -0.600 | < 1.00E-04 |
| <i>KIAA0141</i>     | -0.813 | < 1.00E-04 | <i>SETD1A</i>       | -0.600 | < 1.00E-04 |
| <i>SCAMP1</i>       | -0.819 | < 1.00E-04 | <i>ESPL1</i>        | -0.600 | < 1.00E-04 |
| <i>CAMK2N2</i>      | -0.831 | < 1.00E-04 | <i>UBAP2L</i>       | -0.608 | < 1.00E-04 |
| <i>HAND1</i>        | -0.844 | < 1.00E-04 | <i>CCNB2</i>        | -0.610 | < 1.00E-04 |
| <i>SNX21</i>        | -0.846 | < 1.00E-04 | <i>TBRG4</i>        | -0.615 | < 1.00E-04 |
| <i>PEX11G</i>       | -0.849 | < 1.00E-04 | <i>PSRC1</i>        | -0.618 | < 1.00E-04 |
| <i>MAGI2</i>        | -0.851 | < 1.00E-04 | <i>KIF20B</i>       | -0.618 | < 1.00E-04 |
| <i>ZNF251</i>       | -0.852 | < 1.00E-04 | <i>TIMELESS</i>     | -0.620 | < 1.00E-04 |
| <i>ACVR2B</i>       | -0.859 | < 1.00E-04 | <i>CABLES1</i>      | -0.620 | < 1.00E-04 |
| <i>SYNGR1</i>       | -0.859 | < 1.00E-04 | <i>CCDC34</i>       | -0.623 | < 1.00E-04 |
| <i>GTF2IRD1</i>     | -0.861 | < 1.00E-04 | <i>GINS4</i>        | -0.625 | < 1.00E-04 |
| <i>IGSF8</i>        | -0.868 | < 1.00E-04 | <i>CDC25A</i>       | -0.625 | < 1.00E-04 |
| <i>C3orf15</i>      | -0.878 | < 1.00E-04 | <i>KIF14</i>        | -0.630 | < 1.00E-04 |
| <i>CCDC114</i>      | -0.891 | < 1.00E-04 | <i>C12orf52</i>     | -0.630 | < 1.00E-04 |
| <i>FAM222A</i>      | -0.893 | < 1.00E-04 | <i>EIF2B4</i>       | -0.633 | < 1.00E-04 |
| <i>MTL5</i>         | -0.893 | < 1.00E-04 | <i>TICRR</i>        | -0.633 | < 1.00E-04 |
| <i>MAFG-AS1</i>     | -0.895 | < 1.00E-04 | <i>FAXC</i>         | -0.633 | < 1.00E-04 |
| <i>LOC81691</i>     | -0.900 | < 1.00E-04 | <i>C16orf13</i>     | -0.633 | < 1.00E-04 |
| <i>CCDC149</i>      | -0.902 | < 1.00E-04 | <i>POLR1C</i>       | -0.640 | < 1.00E-04 |
| <i>FLJ22184</i>     | -0.902 | < 1.00E-04 | <i>KIF18A</i>       | -0.643 | < 1.00E-04 |
| <i>TRPT1</i>        | -0.906 | < 1.00E-04 | <i>CCNF</i>         | -0.643 | < 1.00E-04 |
| <i>PIGQ</i>         | -0.908 | < 1.00E-04 | <i>MAFG-AS1</i>     | -0.647 | < 1.00E-04 |
| <i>SLC25A2</i>      | -0.912 | < 1.00E-04 | <i>C1orf135</i>     | -0.648 | < 1.00E-04 |
| <i>PLA2G6</i>       | -0.917 | < 1.00E-04 | <i>C16orf59</i>     | -0.648 | < 1.00E-04 |
| <i>SHF</i>          | -0.924 | < 1.00E-04 | <i>CDC45</i>        | -0.650 | < 1.00E-04 |
| <i>PPP1R16A</i>     | -0.927 | < 1.00E-04 | <i>KIFC2</i>        | -0.653 | < 1.00E-04 |
| <i>ROGDI</i>        | -0.927 | < 1.00E-04 | <i>C11orf83</i>     | -0.657 | < 1.00E-04 |
| <i>MRPL43</i>       | -0.930 | < 1.00E-04 | <i>PPFIA4</i>       | -0.658 | < 1.00E-04 |
| <i>FAM195A</i>      | -0.933 | < 1.00E-04 | <i>FAM20B</i>       | -0.658 | < 1.00E-04 |

|                  |        |            |                  |        |            |
|------------------|--------|------------|------------------|--------|------------|
| <i>NPEPL1</i>    | -0.938 | < 1.00E-04 | <i>FBXO44</i>    | -0.660 | < 1.00E-04 |
| <i>CACNB3</i>    | -0.941 | < 1.00E-04 | <i>ZNF74</i>     | -0.663 | < 1.00E-04 |
| <i>ITGA10</i>    | -0.949 | < 1.00E-04 | <i>TTC26</i>     | -0.663 | < 1.00E-04 |
| <i>TRIM45</i>    | -0.951 | < 1.00E-04 | <i>ZNF251</i>    | -0.663 | < 1.00E-04 |
| <i>TRMT10A</i>   | -0.954 | < 1.00E-04 | <i>ZNF696</i>    | -0.668 | < 1.00E-04 |
| <i>KIFC2</i>     | -0.956 | < 1.00E-04 | <i>ZC2HC1C</i>   | -0.668 | < 1.00E-04 |
| <i>ZC2HC1C</i>   | -0.970 | < 1.00E-04 | <i>RPP21</i>     | -0.670 | < 1.00E-04 |
| <i>ACY1</i>      | -0.979 | < 1.00E-04 | <i>LRRC27</i>    | -0.670 | < 1.00E-04 |
| <i>WDR96</i>     | -0.981 | < 1.00E-04 | <i>WDR34</i>     | -0.673 | < 1.00E-04 |
| <i>TMEM67</i>    | -0.986 | < 1.00E-04 | <i>WHSC1</i>     | -0.688 | < 1.00E-04 |
| <i>NUDT12</i>    | -1.000 | < 1.00E-04 | <i>GTPBP3</i>    | -0.693 | < 1.00E-04 |
| <i>FP588</i>     | -1.012 | < 1.00E-04 | <i>ZNF3</i>      | -0.705 | < 1.00E-04 |
| <i>IFT88</i>     | -1.012 | < 1.00E-04 | <i>CDC25C</i>    | -0.705 | < 1.00E-04 |
| <i>USP30</i>     | -1.025 | < 1.00E-04 | <i>ARHGAP39</i>  | -0.707 | < 1.00E-04 |
| <i>TMEM120A</i>  | -1.025 | < 1.00E-04 | <i>URB2</i>      | -0.713 | < 1.00E-04 |
| <i>CACNA1D</i>   | -1.050 | < 1.00E-04 | <i>RAD54L</i>    | -0.718 | < 1.00E-04 |
| <i>LINC00467</i> | -1.064 | < 1.00E-04 | <i>WHSC2</i>     | -0.728 | < 1.00E-04 |
| <i>DYNLRB2</i>   | -1.075 | < 1.00E-04 | <i>ATAT1</i>     | -0.730 | < 1.00E-04 |
| <i>NUDT16L1</i>  | -1.086 | < 1.00E-04 | <i>RNFT2</i>     | -0.738 | < 1.00E-04 |
| <i>MAG11</i>     | -1.088 | < 1.00E-04 | <i>GTF2IRD1</i>  | -0.745 | < 1.00E-04 |
| <i>LRRC27</i>    | -1.145 | < 1.00E-04 | <i>LOC81691</i>  | -0.755 | < 1.00E-04 |
| <i>KLC4</i>      | -1.147 | < 1.00E-04 | <i>SPIRE2</i>    | -0.757 | < 1.00E-04 |
| <i>CTSF</i>      | -1.178 | < 1.00E-04 | <i>RECQL4</i>    | -0.773 | < 1.00E-04 |
| <i>GARNL3</i>    | -1.189 | < 1.00E-04 | <i>TMEM106C</i>  | -0.803 | < 1.00E-04 |
| <i>MTERFD3</i>   | -1.190 | < 1.00E-04 | <i>C1orf162</i>  | 1.223  | 1.00E-04   |
| <i>CABLES1</i>   | -1.230 | < 1.00E-04 | <i>F13A1</i>     | 1.213  | 1.00E-04   |
| <i>LCP2</i>      | 2.237  | 1.00E-04   | <i>FCGR2B</i>    | 1.163  | 1.00E-04   |
| <i>FAM26F</i>    | 2.219  | 1.00E-04   | <i>DNAJA3</i>    | -0.598 | 1.00E-04   |
| <i>TAGAP</i>     | 2.111  | 1.00E-04   | <i>PECAM1</i>    | 1.273  | 3.00E-04   |
| <i>CCL8</i>      | 1.998  | 1.00E-04   | <i>RNASE6</i>    | 1.240  | 3.00E-04   |
| <i>ADAMDEC1</i>  | 1.961  | 1.00E-04   | <i>DPP4</i>      | 0.958  | 3.00E-04   |
| <i>FBXO44</i>    | -0.823 | 1.00E-04   | <i>TTH1</i>      | -0.588 | 3.00E-04   |
| <i>RSPH1</i>     | -0.845 | 1.00E-04   | <i>C3orf15</i>   | -0.597 | 3.00E-04   |
| <i>TNFSF13B</i>  | 2.125  | 2.00E-04   | <i>C9orf100</i>  | -0.607 | 3.00E-04   |
| <i>VCAM1</i>     | 1.985  | 2.00E-04   | <i>APOO</i>      | -0.643 | 3.00E-04   |
| <i>SPEF2</i>     | -0.890 | 2.00E-04   | <i>CSF1R</i>     | 1.273  | 4.00E-04   |
| <i>MMEL1</i>     | -0.904 | 2.00E-04   | <i>GGTA1P</i>    | 1.127  | 4.00E-04   |
| <i>NLRC5</i>     | 2.081  | 3.00E-04   | <i>PTGER4</i>    | 1.063  | 4.00E-04   |
| <i>TFEC</i>      | 2.022  | 3.00E-04   | <i>ALDH1A1</i>   | 1.023  | 4.00E-04   |
| <i>CTSC</i>      | 1.998  | 3.00E-04   | <i>ZNF731P</i>   | 0.090  | 4.00E-04   |
| <i>LAMP3</i>     | 1.995  | 3.00E-04   | <i>LOC728095</i> | 0.027  | 4.00E-04   |
| <i>MIR155HG</i>  | 1.962  | 3.00E-04   | <i>LOC645739</i> | -0.020 | 4.00E-04   |
| <i>ZBED2</i>     | 1.658  | 3.00E-04   | <i>CHLI-AS2</i>  | -0.033 | 4.00E-04   |
| <i>TMEM129</i>   | -0.821 | 3.00E-04   | <i>LOC91450</i>  | -0.057 | 4.00E-04   |
| <i>LRRC8E</i>    | -0.898 | 3.00E-04   | <i>LOC90784</i>  | -0.067 | 4.00E-04   |
| <i>SAMD9L</i>    | 2.320  | 4.00E-04   | <i>FLJ37786</i>  | -0.070 | 4.00E-04   |
| <i>PIK3AP1</i>   | 1.942  | 4.00E-04   | <i>BLOC1S5</i>   | -0.070 | 4.00E-04   |
| <i>C16orf54</i>  | 1.838  | 4.00E-04   | <i>STL</i>       | -0.077 | 4.00E-04   |
| <i>CXCL13</i>    | 1.699  | 4.00E-04   | <i>LOC730236</i> | -0.083 | 4.00E-04   |
| <i>FDCSP</i>     | 1.271  | 4.00E-04   | <i>LOC729570</i> | -0.090 | 4.00E-04   |
| <i>LOC91450</i>  | 0.313  | 4.00E-04   | <i>HIATL2</i>    | -0.105 | 4.00E-04   |

|                  |        |          |                  |        |          |
|------------------|--------|----------|------------------|--------|----------|
| <i>OIP5-AS1</i>  | 0.122  | 4.00E-04 | <i>LINC00460</i> | -0.107 | 4.00E-04 |
| <i>EPR1</i>      | 0.046  | 4.00E-04 | <i>TGIF2LY</i>   | -0.115 | 4.00E-04 |
| <i>LOC728095</i> | 0.019  | 4.00E-04 | <i>GMNC</i>      | -0.130 | 4.00E-04 |
| <i>LOC729683</i> | 0.005  | 4.00E-04 | <i>SLC1A3</i>    | 0.958  | 5.00E-04 |
| <i>LOC90784</i>  | -0.028 | 4.00E-04 | <i>NBPF3</i>     | -0.610 | 5.00E-04 |
| <i>C6orf114</i>  | -0.061 | 4.00E-04 | <i>MPEG1</i>     | 1.217  | 6.00E-04 |
| <i>LOC728142</i> | -0.070 | 4.00E-04 | <i>GIMAP6</i>    | 1.203  | 6.00E-04 |
| <i>HIATL2</i>    | -0.081 | 4.00E-04 | <i>CFHR2</i>     | 0.888  | 6.00E-04 |
| <i>SNHG4</i>     | -0.092 | 4.00E-04 | <i>UNG</i>       | -0.653 | 6.00E-04 |
| <i>HCG2P7</i>    | -0.133 | 4.00E-04 | <i>CXCL12</i>    | 1.198  | 7.00E-04 |
| <i>TGIF2LY</i>   | -0.134 | 4.00E-04 | <i>SFRP2</i>     | 1.030  | 7.00E-04 |
| <i>LOC554207</i> | -0.145 | 4.00E-04 | <i>MS4A6A</i>    | 1.305  | 8.00E-04 |
| <i>ZFP2</i>      | -0.883 | 4.00E-04 | <i>CPVL</i>      | 1.085  | 8.00E-04 |
| <i>CARD16</i>    | 2.109  | 5.00E-04 | <i>EPB41L3</i>   | 1.053  | 8.00E-04 |
| <i>FAM172A</i>   | -0.856 | 6.00E-04 | <i>PTPRO</i>     | 0.990  | 8.00E-04 |
| <i>MPEG1</i>     | 2.075  | 7.00E-04 | <i>DSCC1</i>     | -0.638 | 8.00E-04 |
| <i>MNDA</i>      | 2.066  | 7.00E-04 | <i>LGMN</i>      | 1.053  | 9.00E-04 |
| <i>GZMB</i>      | 1.954  | 7.00E-04 | <i>C1QC</i>      | 1.150  | 1.00E-03 |
| <i>ICOS</i>      | 1.908  | 7.00E-04 | <i>C12orf59</i>  | 0.563  | 1.00E-03 |
| <i>APOBEC3A</i>  | 1.591  | 8.00E-04 | <i>ZNF239</i>    | -0.620 | 1.00E-03 |
| <i>PPFIA3</i>    | -0.839 | 8.00E-04 | <i>MITF</i>      | 0.975  | 1.10E-03 |
| <i>PARD6G</i>    | -0.846 | 8.00E-04 | <i>CAMK2N2</i>   | -0.583 | 1.10E-03 |
| <i>NLRC3</i>     | 1.923  | 9.00E-04 | <i>SERPING1</i>  | 1.180  | 1.20E-03 |
| <i>STAMBPL1</i>  | 1.884  | 9.00E-04 | <i>GNG2</i>      | 1.093  | 1.20E-03 |
| <i>EGFL6</i>     | 1.558  | 9.00E-04 | <i>LHFPL2</i>    | 1.068  | 1.20E-03 |
| <i>CLEC4C</i>    | 0.889  | 9.00E-04 | <i>CCNB1</i>     | -0.595 | 1.20E-03 |
| <i>BIRC3</i>     | 2.055  | 1.00E-03 | <i>FAM69A</i>    | 0.998  | 1.30E-03 |
| <i>AIM2</i>      | 1.932  | 1.00E-03 | <i>USP13</i>     | -0.590 | 1.30E-03 |
| <i>SEL1L3</i>    | 1.669  | 1.00E-03 | <i>CLEC2B</i>    | 1.105  | 1.40E-03 |
| <i>IGLL3P</i>    | 1.373  | 1.00E-03 | <i>VSIG4</i>     | 1.170  | 1.50E-03 |
| <i>CYTIP</i>     | 1.973  | 1.10E-03 | <i>CNRIP1</i>    | 1.143  | 1.50E-03 |
| <i>CMPK2</i>     | 1.953  | 1.10E-03 | <i>FAM43A</i>    | 0.773  | 1.50E-03 |
| <i>IDO1</i>      | 1.907  | 1.10E-03 | <i>WIPF1</i>     | 1.213  | 1.60E-03 |
| <i>PLAC8</i>     | 1.701  | 1.10E-03 | <i>TLR4</i>      | 1.183  | 1.60E-03 |
| <i>RAB36</i>     | -0.807 | 1.10E-03 | <i>GPR155</i>    | 0.990  | 1.60E-03 |
| <i>REEP6</i>     | -0.815 | 1.10E-03 | <i>BASP1</i>     | 0.915  | 1.60E-03 |
| <i>SAMHD1</i>    | 1.887  | 1.20E-03 | <i>MME</i>       | 0.785  | 1.60E-03 |
| <i>HCP5</i>      | 1.892  | 1.30E-03 | <i>MTL5</i>      | -0.578 | 1.60E-03 |
| <i>STPG1</i>     | -0.819 | 1.30E-03 | <i>LRRC14</i>    | -0.578 | 1.60E-03 |
| <i>SAMSN1</i>    | 2.014  | 1.40E-03 | <i>DOCK11</i>    | 1.193  | 1.70E-03 |
| <i>APOBEC3G</i>  | 1.982  | 1.40E-03 | <i>MNDA</i>      | 1.173  | 1.70E-03 |
| <i>CCR5</i>      | 1.980  | 1.40E-03 | <i>ENTPD1</i>    | 1.110  | 1.70E-03 |
| <i>PTGER4</i>    | 1.665  | 1.40E-03 | <i>ABCA1</i>     | 1.098  | 1.70E-03 |
| <i>MCOLN2</i>    | 1.546  | 1.40E-03 | <i>RCCD1</i>     | -0.583 | 1.70E-03 |
| <i>ERAP2</i>     | 1.265  | 1.40E-03 | <i>SRSF12</i>    | -0.593 | 1.70E-03 |
| <i>RRN3P2</i>    | 0.970  | 1.40E-03 | <i>MZT2B</i>     | -0.620 | 1.70E-03 |
| <i>GNLY</i>      | 1.755  | 1.50E-03 | <i>CD53</i>      | 1.220  | 1.80E-03 |
| <i>CRTAM</i>     | 1.672  | 1.50E-03 | <i>CH25H</i>     | 0.930  | 1.80E-03 |
| <i>PLA2G7</i>    | 1.570  | 1.50E-03 | <i>JPH1</i>      | -0.583 | 1.80E-03 |
| <i>HTRA4</i>     | 1.120  | 1.50E-03 | <i>DGCR14</i>    | -0.605 | 1.80E-03 |
| <i>TMEM163</i>   | 0.682  | 1.50E-03 | <i>MCM7</i>      | -0.638 | 1.90E-03 |

|                  |        |          |                 |        |          |
|------------------|--------|----------|-----------------|--------|----------|
| <i>GIMAP5</i>    | 2.058  | 1.60E-03 | <i>DAB2</i>     | 1.218  | 2.00E-03 |
| <i>PTPRO</i>     | 1.515  | 1.60E-03 | <i>IL10RA</i>   | 1.213  | 2.00E-03 |
| <i>TNFRSF17</i>  | 1.345  | 1.60E-03 | <i>ADRB2</i>    | 0.805  | 2.00E-03 |
| <i>C10orf57</i>  | -0.836 | 1.60E-03 | <i>NRN1</i>     | 0.670  | 2.00E-03 |
| <i>SLC1A3</i>    | 1.250  | 1.70E-03 | <i>SYCP3</i>    | -0.533 | 2.00E-03 |
| <i>CD53</i>      | 2.087  | 1.80E-03 | <i>FLAD1</i>    | -0.595 | 2.00E-03 |
| <i>CD38</i>      | 1.715  | 1.80E-03 | <i>RAP1GAP</i>  | -0.670 | 2.00E-03 |
| <i>KIAA0226L</i> | 1.416  | 1.80E-03 | <i>DNA2</i>     | -0.685 | 2.00E-03 |
| <i>AGR3</i>      | -0.841 | 1.80E-03 | <i>MRPS26</i>   | -0.743 | 2.00E-03 |
| <i>TAPT1</i>     | -0.870 | 1.80E-03 | <i>DOCK8</i>    | 1.153  | 2.10E-03 |
| <i>CYBB</i>      | 2.021  | 1.90E-03 | <i>GPNMB</i>    | 1.020  | 2.10E-03 |
| <i>MMP16</i>     | -0.807 | 1.90E-03 | <i>ENPP2</i>    | 0.990  | 2.10E-03 |
| <i>ERGIC1</i>    | -0.814 | 1.90E-03 | <i>TMEM200A</i> | 0.867  | 2.10E-03 |
| <i>ZNF213</i>    | -0.859 | 1.90E-03 | <i>COL6A6</i>   | 0.700  | 2.10E-03 |
| <i>DOCK8</i>     | 1.983  | 2.00E-03 | <i>PIAS2</i>    | -0.573 | 2.10E-03 |
| <i>GZMA</i>      | 1.924  | 2.00E-03 | <i>CASKIN1</i>  | -0.587 | 2.10E-03 |
| <i>LINC00277</i> | -0.883 | 2.00E-03 | <i>QTRT1</i>    | -0.588 | 2.10E-03 |
| <i>CELF5</i>     | -0.919 | 2.00E-03 | <i>RRP15</i>    | -0.590 | 2.10E-03 |
| <i>RAP1GAP</i>   | -0.957 | 2.00E-03 | <i>RAVER1</i>   | -0.600 | 2.10E-03 |
| <i>NEDD4L</i>    | -1.069 | 2.00E-03 | <i>WDR52</i>    | -0.605 | 2.10E-03 |
| <i>TIGIT</i>     | 1.666  | 2.10E-03 | <i>CENPM</i>    | -0.618 | 2.10E-03 |
| <i>C7orf29</i>   | 0.683  | 2.10E-03 | <i>PAXIP1</i>   | -0.623 | 2.10E-03 |
| <i>GSTM3</i>     | -0.763 | 2.10E-03 | <i>SBNO1</i>    | -0.660 | 2.10E-03 |
| <i>C1orf21</i>   | -0.810 | 2.10E-03 | <i>OVOL2</i>    | -0.713 | 2.10E-03 |
| <i>RNF180</i>    | -0.816 | 2.10E-03 | <i>CTSK</i>     | 1.170  | 2.20E-03 |
| <i>OVOL2</i>     | -0.836 | 2.10E-03 | <i>GIMAP7</i>   | 1.103  | 2.20E-03 |
| <i>ATP6V0E2</i>  | -0.885 | 2.10E-03 | <i>LPHN1</i>    | -0.593 | 2.20E-03 |
| <i>EFCAB4A</i>   | -0.891 | 2.10E-03 | <i>PPP1R16A</i> | -0.593 | 2.20E-03 |
| <i>CASKIN1</i>   | -0.915 | 2.10E-03 | <i>PANK1</i>    | -0.617 | 2.20E-03 |
| <i>SERINC5</i>   | -0.997 | 2.10E-03 | <i>RAD18</i>    | -0.627 | 2.20E-03 |
| <i>RASSF4</i>    | 1.855  | 2.20E-03 | <i>FBXO46</i>   | -0.628 | 2.20E-03 |
| <i>IGJ</i>       | 1.485  | 2.20E-03 | <i>PMS2P1</i>   | -0.643 | 2.20E-03 |
| <i>FUT4</i>      | 1.273  | 2.20E-03 | <i>NRTN</i>     | -0.643 | 2.20E-03 |
| <i>CCND2</i>     | 1.069  | 2.20E-03 | <i>ESRP1</i>    | -0.643 | 2.20E-03 |
| <i>IDO2</i>      | 0.925  | 2.20E-03 | <i>PACSIN3</i>  | -0.655 | 2.20E-03 |
| <i>FAM196A</i>   | -0.698 | 2.20E-03 | <i>FILIP1L</i>  | 1.118  | 2.30E-03 |
| <i>GNG3</i>      | -0.773 | 2.20E-03 | <i>C1QB</i>     | 1.095  | 2.30E-03 |
| <i>WDR52</i>     | -0.797 | 2.20E-03 | <i>PLA2G7</i>   | 0.850  | 2.30E-03 |
| <i>LPPR2</i>     | -0.818 | 2.20E-03 | <i>ADIPOQ</i>   | 0.655  | 2.30E-03 |
| <i>GABRD</i>     | -0.832 | 2.20E-03 | <i>FAM196A</i>  | -0.493 | 2.30E-03 |
| <i>ZSWIM5</i>    | -0.908 | 2.20E-03 | <i>RTTN</i>     | -0.587 | 2.30E-03 |
| <i>MORN4</i>     | -0.962 | 2.20E-03 | <i>UNC45A</i>   | -0.595 | 2.30E-03 |
| <i>FLJ37453</i>  | -1.010 | 2.20E-03 | <i>KIF11</i>    | -0.608 | 2.30E-03 |
| <i>RAP2B</i>     | 1.273  | 2.30E-03 | <i>ZNF713</i>   | -0.613 | 2.30E-03 |
| <i>ERICH1</i>    | 1.006  | 2.30E-03 | <i>SEPT3</i>    | -0.663 | 2.30E-03 |
| <i>C14orf39</i>  | -0.671 | 2.30E-03 | <i>CIQA</i>     | 1.108  | 2.40E-03 |
| <i>CCDC110</i>   | -0.784 | 2.30E-03 | <i>PDPN</i>     | 0.995  | 2.40E-03 |
| <i>MLH3</i>      | -0.794 | 2.30E-03 | <i>PLTP</i>     | 0.983  | 2.40E-03 |
| <i>C17orf104</i> | -0.794 | 2.30E-03 | <i>TBX20</i>    | -0.540 | 2.40E-03 |
| <i>PACSIN3</i>   | -0.799 | 2.30E-03 | <i>ECII</i>     | -0.585 | 2.40E-03 |
| <i>ZNF425</i>    | -0.814 | 2.30E-03 | <i>C20orf20</i> | -0.590 | 2.40E-03 |

|                 |        |          |                  |        |          |
|-----------------|--------|----------|------------------|--------|----------|
| <i>RABL5</i>    | -0.816 | 2.30E-03 | <i>ASPM</i>      | -0.598 | 2.40E-03 |
| <i>NPDC1</i>    | -0.832 | 2.30E-03 | <i>FANCB</i>     | -0.600 | 2.40E-03 |
| <i>TSTD1</i>    | -0.873 | 2.30E-03 | <i>WDR66</i>     | -0.627 | 2.40E-03 |
| <i>ATP8B1</i>   | -0.919 | 2.30E-03 | <i>PLCH1</i>     | -0.643 | 2.40E-03 |
| <i>EPN2</i>     | -1.004 | 2.30E-03 | <i>ADAP2</i>     | 1.123  | 2.50E-03 |
| <i>GUSBP1</i>   | -1.010 | 2.30E-03 | <i>NRP1</i>      | 1.068  | 2.50E-03 |
| <i>C7orf41</i>  | -1.024 | 2.30E-03 | <i>SIPR1</i>     | 1.028  | 2.50E-03 |
| <i>STAT1</i>    | 2.045  | 2.40E-03 | <i>HYAL3</i>     | -0.583 | 2.50E-03 |
| <i>HLA-DRB6</i> | 1.612  | 2.40E-03 | <i>MYO19</i>     | -0.588 | 2.50E-03 |
| <i>GUSBP11</i>  | 1.408  | 2.40E-03 | <i>ZNF7</i>      | -0.593 | 2.50E-03 |
| <i>APOL4</i>    | 1.211  | 2.40E-03 | <i>CDCA3</i>     | -0.595 | 2.50E-03 |
| <i>TBX20</i>    | -0.629 | 2.40E-03 | <i>NFYA</i>      | -0.600 | 2.50E-03 |
| <i>KLHL10</i>   | -0.691 | 2.40E-03 | <i>PPAT</i>      | -0.618 | 2.50E-03 |
| <i>WDR66</i>    | -0.769 | 2.40E-03 | <i>DTL</i>       | -0.655 | 2.50E-03 |
| <i>MIPEP</i>    | -0.787 | 2.40E-03 | <i>NVL</i>       | -0.668 | 2.50E-03 |
| <i>CERS4</i>    | -0.792 | 2.40E-03 | <i>ILF3</i>      | -0.678 | 2.50E-03 |
| <i>DECR2</i>    | -0.799 | 2.40E-03 | <i>ANKRD54</i>   | -0.713 | 2.50E-03 |
| <i>TCTN1</i>    | -0.824 | 2.40E-03 | <i>INTS7</i>     | -0.723 | 2.50E-03 |
| <i>ACADSB</i>   | -0.826 | 2.40E-03 | <i>C10orf2</i>   | -0.728 | 2.50E-03 |
| <i>SREBF1</i>   | -0.832 | 2.40E-03 | <i>RAD54B</i>    | -0.753 | 2.50E-03 |
| <i>RND2</i>     | -0.844 | 2.40E-03 | <i>POP1</i>      | -0.755 | 2.50E-03 |
| <i>DOCK6</i>    | -0.855 | 2.40E-03 | <i>C1orf172</i>  | -0.830 | 2.50E-03 |
| <i>KCNS2</i>    | -0.859 | 2.40E-03 | <i>RCC1</i>      | -0.835 | 2.50E-03 |
| <i>ASIC1</i>    | -0.917 | 2.40E-03 | <i>CFI</i>       | 1.010  | 2.60E-03 |
| <i>PRRT3</i>    | -0.936 | 2.40E-03 | <i>CCND2</i>     | 0.680  | 2.60E-03 |
| <i>MARVELD2</i> | -1.113 | 2.40E-03 | <i>KCTD4</i>     | -0.530 | 2.60E-03 |
| <i>TTY10</i>    | -0.707 | 2.50E-03 | <i>TDRD5</i>     | -0.570 | 2.60E-03 |
| <i>FSIP1</i>    | -0.759 | 2.50E-03 | <i>ZNF473</i>    | -0.578 | 2.60E-03 |
| <i>DGKD</i>     | -0.796 | 2.50E-03 | <i>MAGOHB</i>    | -0.588 | 2.60E-03 |
| <i>ACVR1B</i>   | -0.797 | 2.50E-03 | <i>CLUAP1</i>    | -0.593 | 2.60E-03 |
| <i>RTN2</i>     | -0.813 | 2.50E-03 | <i>CACNB3</i>    | -0.608 | 2.60E-03 |
| <i>TLL1</i>     | -0.818 | 2.50E-03 | <i>SBK1</i>      | -0.610 | 2.60E-03 |
| <i>KDM4B</i>    | -0.837 | 2.50E-03 | <i>POLA1</i>     | -0.628 | 2.60E-03 |
| <i>KCTD1</i>    | -0.840 | 2.50E-03 | <i>NPM3</i>      | -0.635 | 2.60E-03 |
| <i>CLUL1</i>    | -0.851 | 2.50E-03 | <i>TMEM201</i>   | -0.643 | 2.60E-03 |
| <i>WWC2-AS2</i> | -0.854 | 2.50E-03 | <i>CSNK1E</i>    | -0.658 | 2.60E-03 |
| <i>LONRF2</i>   | -1.349 | 2.50E-03 | <i>SOX12</i>     | -0.670 | 2.60E-03 |
| <i>SRGN</i>     | 2.075  | 2.60E-03 | <i>MCM4</i>      | -0.685 | 2.60E-03 |
| <i>GIMAP2</i>   | 2.033  | 2.60E-03 | <i>ARHGEF19</i>  | -0.693 | 2.60E-03 |
| <i>KLRK1</i>    | 1.813  | 2.60E-03 | <i>WDR35</i>     | -0.793 | 2.60E-03 |
| <i>IL21R</i>    | 1.812  | 2.60E-03 | <i>RNASE1</i>    | 1.003  | 2.70E-03 |
| <i>PYHIN1</i>   | 1.773  | 2.60E-03 | <i>FMO1</i>      | 0.963  | 2.70E-03 |
| <i>ANKRD22</i>  | 1.693  | 2.60E-03 | <i>LINC00341</i> | 0.925  | 2.70E-03 |
| <i>AZGP1</i>    | -0.746 | 2.60E-03 | <i>SHF</i>       | -0.553 | 2.70E-03 |
| <i>STARD6</i>   | -0.748 | 2.60E-03 | <i>TFAP2D</i>    | -0.573 | 2.70E-03 |
| <i>TFAP2A</i>   | -0.817 | 2.60E-03 | <i>BZRAP1</i>    | -0.580 | 2.70E-03 |
| <i>RTN4RL1</i>  | -0.822 | 2.60E-03 | <i>UBE3D</i>     | -0.587 | 2.70E-03 |
| <i>SOX6</i>     | -0.834 | 2.60E-03 | <i>SLC25A10</i>  | -0.600 | 2.70E-03 |
| <i>BCAM</i>     | -0.842 | 2.60E-03 | <i>LOC400752</i> | -0.617 | 2.70E-03 |
| <i>GSS</i>      | -0.859 | 2.60E-03 | <i>CABYR</i>     | -0.618 | 2.70E-03 |
| <i>CLUAP1</i>   | -0.865 | 2.60E-03 | <i>TXLNG</i>     | -0.620 | 2.70E-03 |

|                  |        |          |                     |        |          |
|------------------|--------|----------|---------------------|--------|----------|
| <i>C1orf194</i>  | -0.869 | 2.60E-03 | <i>MTBP</i>         | -0.637 | 2.70E-03 |
| <i>ANKS1B</i>    | -0.899 | 2.60E-03 | <i>FLVCR1</i>       | -0.637 | 2.70E-03 |
| <i>PCP2</i>      | -0.965 | 2.60E-03 | <i>LYSMD1</i>       | -0.643 | 2.70E-03 |
| <i>SSH3</i>      | -0.995 | 2.60E-03 | <i>SCRIB</i>        | -0.645 | 2.70E-03 |
| <i>SPATA6</i>    | -1.073 | 2.60E-03 | <i>NENF</i>         | -0.660 | 2.70E-03 |
| <i>WDR35</i>     | -1.080 | 2.60E-03 | <i>KRTCAP3</i>      | -0.677 | 2.70E-03 |
| <i>LOC401052</i> | -1.136 | 2.60E-03 | <i>CCHCR1</i>       | -0.690 | 2.70E-03 |
| <i>APOL1</i>     | 1.924  | 2.70E-03 | <i>BCL7A</i>        | -0.733 | 2.70E-03 |
| <i>SLC7A7</i>    | 1.912  | 2.70E-03 | <i>SLC19A1</i>      | -0.735 | 2.70E-03 |
| <i>HLA-DRB1</i>  | 1.882  | 2.70E-03 | <i>NR2C2AP</i>      | -0.817 | 2.70E-03 |
| <i>PTPN22</i>    | 1.863  | 2.70E-03 | <i>STARD6</i>       | -0.483 | 2.80E-03 |
| <i>LOC96610</i>  | 1.180  | 2.70E-03 | <i>C22orf29</i>     | -0.545 | 2.80E-03 |
| <i>DNASE1</i>    | -0.708 | 2.70E-03 | <i>SOX6</i>         | -0.570 | 2.80E-03 |
| <i>IFNA21</i>    | -0.770 | 2.70E-03 | <i>MCMDC2</i>       | -0.570 | 2.80E-03 |
| <i>LOC400752</i> | -0.829 | 2.70E-03 | <i>SLMO1</i>        | -0.578 | 2.80E-03 |
| <i>UCN</i>       | -0.840 | 2.70E-03 | <i>HSPA4L</i>       | -0.580 | 2.80E-03 |
| <i>TACC2</i>     | -0.844 | 2.70E-03 | <i>GRHL2</i>        | -0.583 | 2.80E-03 |
| <i>DIP2C</i>     | -0.887 | 2.70E-03 | <i>KIFC1</i>        | -0.590 | 2.80E-03 |
| <i>TMEM145</i>   | -0.888 | 2.70E-03 | <i>SNRPD1</i>       | -0.593 | 2.80E-03 |
| <i>SLC25A29</i>  | -0.896 | 2.70E-03 | <i>SLC39A3</i>      | -0.597 | 2.80E-03 |
| <i>RAB26</i>     | -0.904 | 2.70E-03 | <i>CATSPER3</i>     | -0.597 | 2.80E-03 |
| <i>TTC39A</i>    | -0.906 | 2.70E-03 | <i>ANKRD23</i>      | -0.597 | 2.80E-03 |
| <i>RGL2</i>      | -0.943 | 2.70E-03 | <i>C10orf35</i>     | -0.600 | 2.80E-03 |
| <i>DNAAF3</i>    | -0.996 | 2.70E-03 | <i>GCAT</i>         | -0.608 | 2.80E-03 |
| <i>LMF1</i>      | -1.017 | 2.70E-03 | <i>PRDX2</i>        | -0.610 | 2.80E-03 |
| <i>PPP1R13B</i>  | -1.039 | 2.70E-03 | <i>SAC3D1</i>       | -0.613 | 2.80E-03 |
| <i>LOC113230</i> | -1.048 | 2.70E-03 | <i>USP21</i>        | -0.618 | 2.80E-03 |
| <i>MMAB</i>      | -1.140 | 2.70E-03 | <i>SGOL1</i>        | -0.627 | 2.80E-03 |
| <i>IL2RB</i>     | 1.926  | 2.80E-03 | <i>KIF22</i>        | -0.635 | 2.80E-03 |
| <i>GCET2</i>     | 1.471  | 2.80E-03 | <i>KIAA1549</i>     | -0.640 | 2.80E-03 |
| <i>OLR1</i>      | 1.251  | 2.80E-03 | <i>ANAPC7</i>       | -0.640 | 2.80E-03 |
| <i>RAB42</i>     | 0.716  | 2.80E-03 | <i>FANCG</i>        | -0.648 | 2.80E-03 |
| <i>METTLL20</i>  | -0.743 | 2.80E-03 | <i>FEM1A</i>        | -0.650 | 2.80E-03 |
| <i>XRRA1</i>     | -0.768 | 2.80E-03 | <i>NEK2</i>         | -0.653 | 2.80E-03 |
| <i>PPFIA4</i>    | -0.771 | 2.80E-03 | <i>C1orf112</i>     | -0.653 | 2.80E-03 |
| <i>GRTP1</i>     | -0.776 | 2.80E-03 | <i>C17orf76-AS1</i> | -0.653 | 2.80E-03 |
| <i>CPLX1</i>     | -0.791 | 2.80E-03 | <i>POLE</i>         | -0.658 | 2.80E-03 |
| <i>MGC3771</i>   | -0.796 | 2.80E-03 | <i>E2F1</i>         | -0.673 | 2.80E-03 |
| <i>ZNF527</i>    | -0.801 | 2.80E-03 | <i>BOLA1</i>        | -0.705 | 2.80E-03 |
| <i>PRRG2</i>     | -0.809 | 2.80E-03 | <i>AGBL5</i>        | -0.748 | 2.80E-03 |
| <i>NPNT</i>      | -0.812 | 2.80E-03 | <i>ZEB2</i>         | 1.160  | 2.90E-03 |
| <i>GOLGA2P5</i>  | -0.814 | 2.80E-03 | <i>SLFN11</i>       | 0.987  | 2.90E-03 |
| <i>GCAT</i>      | -0.826 | 2.80E-03 | <i>CPXM1</i>        | 0.817  | 2.90E-03 |
| <i>DCXR</i>      | -0.827 | 2.80E-03 | <i>CHST7</i>        | 0.680  | 2.90E-03 |
| <i>LOC338799</i> | -0.832 | 2.80E-03 | <i>C3orf80</i>      | 0.487  | 2.90E-03 |
| <i>FBRSL1</i>    | -0.832 | 2.80E-03 | <i>RASD2</i>        | -0.540 | 2.90E-03 |
| <i>ZNF687</i>    | -0.843 | 2.80E-03 | <i>ATP6V1E2</i>     | -0.543 | 2.90E-03 |
| <i>NECAB3</i>    | -0.843 | 2.80E-03 | <i>FKBP4</i>        | -0.593 | 2.90E-03 |
| <i>KIAA1549</i>  | -0.847 | 2.80E-03 | <i>C1orf210</i>     | -0.597 | 2.90E-03 |
| <i>PIK3R2</i>    | -0.852 | 2.80E-03 | <i>TLL12</i>        | -0.610 | 2.90E-03 |
| <i>KIAA0556</i>  | -0.854 | 2.80E-03 | <i>DPCD</i>         | -0.613 | 2.90E-03 |

|                   |        |          |                   |        |          |
|-------------------|--------|----------|-------------------|--------|----------|
| <i>UNC5CL</i>     | -0.874 | 2.80E-03 | <i>ATAD2</i>      | -0.623 | 2.90E-03 |
| <i>GEMIN8</i>     | -0.887 | 2.80E-03 | <i>WDR43</i>      | -0.625 | 2.90E-03 |
| <i>ZNF395</i>     | -0.893 | 2.80E-03 | <i>ZNF24</i>      | -0.628 | 2.90E-03 |
| <i>PLEKHA6</i>    | -0.914 | 2.80E-03 | <i>FLJ37453</i>   | -0.657 | 2.90E-03 |
| <i>CADM2</i>      | -0.930 | 2.80E-03 | <i>VAX2</i>       | -0.665 | 2.90E-03 |
| <i>CATSPER3</i>   | -0.938 | 2.80E-03 | <i>ZMYND19</i>    | -0.687 | 2.90E-03 |
| <i>BBS1</i>       | -0.944 | 2.80E-03 | <i>MCAT</i>       | -0.688 | 2.90E-03 |
| <i>MCMDC2</i>     | -0.947 | 2.80E-03 | <i>DOM3Z</i>      | -0.775 | 2.90E-03 |
| <i>KIAA1429</i>   | -1.001 | 2.80E-03 | <i>LAIR1</i>      | 1.183  | 3.00E-03 |
| <i>CHADL</i>      | -1.003 | 2.80E-03 | <i>PCSK5</i>      | 0.788  | 3.00E-03 |
| <i>SPATA18</i>    | -1.017 | 2.80E-03 | <i>LYG2</i>       | -0.537 | 3.00E-03 |
| <i>FAAH</i>       | -1.083 | 2.80E-03 | <i>CYB5R2</i>     | -0.540 | 3.00E-03 |
| <i>PTPRC</i>      | 2.053  | 2.90E-03 | <i>SLC25A2</i>    | -0.560 | 3.00E-03 |
| <i>MLKL</i>       | 1.984  | 2.90E-03 | <i>HES6</i>       | -0.563 | 3.00E-03 |
| <i>ACSL5</i>      | 1.605  | 2.90E-03 | <i>ZNF16</i>      | -0.568 | 3.00E-03 |
| <i>ASPHD2</i>     | 1.100  | 2.90E-03 | <i>C1orf111</i>   | -0.573 | 3.00E-03 |
| <i>FAM70A</i>     | 0.714  | 2.90E-03 | <i>KLHL17</i>     | -0.577 | 3.00E-03 |
| <i>HOXC10</i>     | -0.675 | 2.90E-03 | <i>MORC2</i>      | -0.578 | 3.00E-03 |
| <i>TEX33</i>      | -0.699 | 2.90E-03 | <i>POLR2H</i>     | -0.580 | 3.00E-03 |
| <i>WBP2NL</i>     | -0.707 | 2.90E-03 | <i>MIF</i>        | -0.580 | 3.00E-03 |
| <i>KAZN</i>       | -0.751 | 2.90E-03 | <i>GCDH</i>       | -0.585 | 3.00E-03 |
| <i>FAM131A</i>    | -0.782 | 2.90E-03 | <i>MLF1IP</i>     | -0.593 | 3.00E-03 |
| <i>LRP2BP</i>     | -0.787 | 2.90E-03 | <i>PHKA1</i>      | -0.595 | 3.00E-03 |
| <i>ADARB2</i>     | -0.792 | 2.90E-03 | <i>DICER1-AS1</i> | -0.597 | 3.00E-03 |
| <i>USP40</i>      | -0.802 | 2.90E-03 | <i>PARPBP</i>     | -0.600 | 3.00E-03 |
| <i>CCNB3</i>      | -0.806 | 2.90E-03 | <i>NAA25</i>      | -0.603 | 3.00E-03 |
| <i>DMRTB1</i>     | -0.809 | 2.90E-03 | <i>TIMM44</i>     | -0.615 | 3.00E-03 |
| <i>SLC22A17</i>   | -0.810 | 2.90E-03 | <i>LIN9</i>       | -0.617 | 3.00E-03 |
| <i>ASB14</i>      | -0.820 | 2.90E-03 | <i>CKAP2L</i>     | -0.617 | 3.00E-03 |
| <i>DNASE1L2</i>   | -0.827 | 2.90E-03 | <i>TOP1MT</i>     | -0.623 | 3.00E-03 |
| <i>C2orf77</i>    | -0.836 | 2.90E-03 | <i>AZ11</i>       | -0.635 | 3.00E-03 |
| <i>IGF1R</i>      | -0.839 | 2.90E-03 | <i>CIT</i>        | -0.638 | 3.00E-03 |
| <i>C20orf96</i>   | -0.860 | 2.90E-03 | <i>OR7E24</i>     | -0.655 | 3.00E-03 |
| <i>ARHGAP33</i>   | -0.864 | 2.90E-03 | <i>TMEM97</i>     | -0.660 | 3.00E-03 |
| <i>GKAP1</i>      | -0.867 | 2.90E-03 | <i>GINS2</i>      | -0.675 | 3.00E-03 |
| <i>CMBL</i>       | -0.884 | 2.90E-03 | <i>MGC27345</i>   | -0.677 | 3.00E-03 |
| <i>LCA5L</i>      | -0.885 | 2.90E-03 | <i>MYEF2</i>      | -0.683 | 3.00E-03 |
| <i>SPRYD7</i>     | -0.890 | 2.90E-03 | <i>TROAP</i>      | -0.690 | 3.00E-03 |
| <i>FAM174B</i>    | -0.940 | 2.90E-03 | <i>SNRPE</i>      | -0.720 | 3.00E-03 |
| <i>LRRC73</i>     | -1.008 | 2.90E-03 | <i>GPR34</i>      | 0.987  | 3.10E-03 |
| <i>TMEM99</i>     | -1.067 | 2.90E-03 | <i>ACP5</i>       | 0.890  | 3.10E-03 |
| <i>VPS37D</i>     | -1.190 | 2.90E-03 | <i>CLUL1</i>      | -0.513 | 3.10E-03 |
| <i>LYZ</i>        | 1.723  | 3.00E-03 | <i>ZSCAN20</i>    | -0.513 | 3.10E-03 |
| <i>PLCL2</i>      | 1.540  | 3.00E-03 | <i>SDR9C7</i>     | -0.517 | 3.10E-03 |
| <i>PLCXD2</i>     | 1.003  | 3.00E-03 | <i>TFDP2</i>      | -0.538 | 3.10E-03 |
| <i>ANKRD36BP2</i> | 0.869  | 3.00E-03 | <i>FHDC1</i>      | -0.553 | 3.10E-03 |
| <i>ZNF713</i>     | -0.697 | 3.00E-03 | <i>SLC5A8</i>     | -0.557 | 3.10E-03 |
| <i>FAM228A</i>    | -0.698 | 3.00E-03 | <i>FAM131A</i>    | -0.558 | 3.10E-03 |
| <i>LYG2</i>       | -0.754 | 3.00E-03 | <i>XRCC6BP1</i>   | -0.567 | 3.10E-03 |
| <i>C6orf225</i>   | -0.794 | 3.00E-03 | <i>RPRML</i>      | -0.570 | 3.10E-03 |
| <i>PHKA1</i>      | -0.798 | 3.00E-03 | <i>ABCA3</i>      | -0.575 | 3.10E-03 |



|                   |        |          |                 |        |          |
|-------------------|--------|----------|-----------------|--------|----------|
| <i>LPHN1</i>      | -0.807 | 3.00E-03 | <i>SUDS3</i>    | -0.577 | 3.10E-03 |
| <i>THSD4</i>      | -0.809 | 3.00E-03 | <i>F12</i>      | -0.583 | 3.10E-03 |
| <i>MAST2</i>      | -0.816 | 3.00E-03 | <i>LIN54</i>    | -0.587 | 3.10E-03 |
| <i>NAT6</i>       | -0.818 | 3.00E-03 | <i>DHTKD1</i>   | -0.590 | 3.10E-03 |
| <i>SPPL3</i>      | -0.826 | 3.00E-03 | <i>C12orf73</i> | -0.590 | 3.10E-03 |
| <i>RDH13</i>      | -0.827 | 3.00E-03 | <i>HELLS</i>    | -0.597 | 3.10E-03 |
| <i>SMCR7</i>      | -0.828 | 3.00E-03 | <i>TCEB2</i>    | -0.598 | 3.10E-03 |
| <i>SLC22A5</i>    | -0.831 | 3.00E-03 | <i>ELAVL1</i>   | -0.603 | 3.10E-03 |
| <i>UBN2</i>       | -0.839 | 3.00E-03 | <i>STRA13</i>   | -0.605 | 3.10E-03 |
| <i>FAM46B</i>     | -0.839 | 3.00E-03 | <i>PHLPP1</i>   | -0.610 | 3.10E-03 |
| <i>YBX2</i>       | -0.852 | 3.00E-03 | <i>PRKCZ</i>    | -0.618 | 3.10E-03 |
| <i>SHISA4</i>     | -0.887 | 3.00E-03 | <i>GTF2H4</i>   | -0.620 | 3.10E-03 |
| <i>MAGI3</i>      | -0.921 | 3.00E-03 | <i>DNAH14</i>   | -0.630 | 3.10E-03 |
| <i>SNRPE</i>      | -0.930 | 3.00E-03 | <i>ZNF497</i>   | -0.637 | 3.10E-03 |
| <i>JMJD8</i>      | -0.954 | 3.00E-03 | <i>KIF15</i>    | -0.640 | 3.10E-03 |
| <i>DICER1-AS1</i> | -0.976 | 3.00E-03 | <i>INTS3</i>    | -0.650 | 3.10E-03 |
| <i>LRRC56</i>     | -0.987 | 3.00E-03 | <i>TRAP1</i>    | -0.670 | 3.10E-03 |
| <i>GOLT1A</i>     | -0.992 | 3.00E-03 | <i>HMGXB4</i>   | -0.670 | 3.10E-03 |
| <i>PRPF40B</i>    | -0.992 | 3.00E-03 | <i>EXOSC2</i>   | -0.683 | 3.10E-03 |
| <i>MYEF2</i>      | -1.098 | 3.00E-03 | <i>PRR22</i>    | -0.693 | 3.10E-03 |
| <i>RGS18</i>      | 1.756  | 3.10E-03 | <i>SFXN4</i>    | -0.703 | 3.10E-03 |
| <i>NPL</i>        | 1.730  | 3.10E-03 | <i>CHDH</i>     | -0.717 | 3.10E-03 |
| <i>LYSMD2</i>     | 1.555  | 3.10E-03 | <i>DHRS13</i>   | -0.720 | 3.10E-03 |
| <i>MMP7</i>       | 1.085  | 3.10E-03 | <i>SLA</i>      | 1.178  | 3.20E-03 |
| <i>RAB9BP1</i>    | -0.659 | 3.10E-03 | <i>SFRP4</i>    | 1.060  | 3.20E-03 |
| <i>HBZ</i>        | -0.690 | 3.10E-03 | <i>ARL4C</i>    | 0.838  | 3.20E-03 |
| <i>CCDC148</i>    | -0.789 | 3.10E-03 | <i>PCDHGC4</i>  | -0.550 | 3.20E-03 |
| <i>C1orf226</i>   | -0.797 | 3.10E-03 | <i>ACTR3B</i>   | -0.563 | 3.20E-03 |
| <i>MZT2B</i>      | -0.798 | 3.10E-03 | <i>ZNF326</i>   | -0.580 | 3.20E-03 |
| <i>HKR1</i>       | -0.817 | 3.10E-03 | <i>KHK</i>      | -0.590 | 3.20E-03 |
| <i>ABCA3</i>      | -0.828 | 3.10E-03 | <i>ZNF397</i>   | -0.593 | 3.20E-03 |
| <i>BAIAP2</i>     | -0.832 | 3.10E-03 | <i>ALKBH2</i>   | -0.603 | 3.20E-03 |
| <i>PEX19</i>      | -0.844 | 3.10E-03 | <i>FANCI</i>    | -0.620 | 3.20E-03 |
| <i>PTOV1</i>      | -0.860 | 3.10E-03 | <i>TSEN54</i>   | -0.627 | 3.20E-03 |
| <i>SERINC2</i>    | -0.867 | 3.10E-03 | <i>LIG1</i>     | -0.678 | 3.20E-03 |
| <i>ZNF497</i>     | -0.869 | 3.10E-03 | <i>SAYS1</i>    | -0.718 | 3.20E-03 |
| <i>TTC18</i>      | -0.874 | 3.10E-03 | <i>CD320</i>    | -0.720 | 3.20E-03 |
| <i>TBX3</i>       | -0.879 | 3.10E-03 | <i>PSMC3IP</i>  | -0.725 | 3.20E-03 |
| <i>LRRC43</i>     | -0.894 | 3.10E-03 | <i>GIMAP4</i>   | 1.180  | 3.30E-03 |
| <i>BNIP1</i>      | -0.908 | 3.10E-03 | <i>GALM</i>     | 0.867  | 3.30E-03 |
| <i>NR2E3</i>      | -0.909 | 3.10E-03 | <i>FABP4</i>    | 0.700  | 3.30E-03 |
| <i>SERTAD4</i>    | -0.920 | 3.10E-03 | <i>GPR37</i>    | -0.460 | 3.30E-03 |
| <i>CASZ1</i>      | -0.923 | 3.10E-03 | <i>DYDC2</i>    | -0.513 | 3.30E-03 |
| <i>MAPT</i>       | -0.938 | 3.10E-03 | <i>C2orf70</i>  | -0.523 | 3.30E-03 |
| <i>RAB40C</i>     | -0.946 | 3.10E-03 | <i>PAQR9</i>    | -0.533 | 3.30E-03 |
| <i>DHRS13</i>     | -0.948 | 3.10E-03 | <i>SERPIN11</i> | -0.540 | 3.30E-03 |
| <i>GAS8</i>       | -0.958 | 3.10E-03 | <i>ANKS6</i>    | -0.553 | 3.30E-03 |
| <i>WDR90</i>      | -1.074 | 3.10E-03 | <i>FLJ25328</i> | -0.570 | 3.30E-03 |
| <i>CHDH</i>       | -1.110 | 3.10E-03 | <i>ABCB8</i>    | -0.585 | 3.30E-03 |
| <i>EFHC1</i>      | -1.148 | 3.10E-03 | <i>PTCHD2</i>   | -0.587 | 3.30E-03 |
| <i>LPAR5</i>      | 1.203  | 3.20E-03 | <i>TSFM</i>     | -0.590 | 3.30E-03 |

|                  |        |          |                     |        |          |
|------------------|--------|----------|---------------------|--------|----------|
| <i>COX7B2</i>    | 0.347  | 3.20E-03 | <i>POCIA</i>        | -0.597 | 3.30E-03 |
| <i>HOXC4</i>     | -0.696 | 3.20E-03 | <i>CDT1</i>         | -0.600 | 3.30E-03 |
| <i>PBOV1</i>     | -0.800 | 3.20E-03 | <i>STMN1</i>        | -0.613 | 3.30E-03 |
| <i>SHANK2</i>    | -0.811 | 3.20E-03 | <i>WEE1</i>         | -0.615 | 3.30E-03 |
| <i>ZNF853</i>    | -0.813 | 3.20E-03 | <i>PAK6</i>         | -0.615 | 3.30E-03 |
| <i>CDKL3</i>     | -0.848 | 3.20E-03 | <i>MORN2</i>        | -0.627 | 3.30E-03 |
| <i>VPS13D</i>    | -0.865 | 3.20E-03 | <i>CACYBP</i>       | -0.628 | 3.30E-03 |
| <i>FBLL1</i>     | -0.875 | 3.20E-03 | <i>SNHG11</i>       | -0.630 | 3.30E-03 |
| <i>FBXL16</i>    | -0.927 | 3.20E-03 | <i>HOOK1</i>        | -0.650 | 3.30E-03 |
| <i>MIPOL1</i>    | -0.971 | 3.20E-03 | <i>CENPV</i>        | -0.653 | 3.30E-03 |
| <i>PSMB9</i>     | 2.098  | 3.30E-03 | <i>TIGD1</i>        | -0.680 | 3.30E-03 |
| <i>SERPINB9</i>  | 1.548  | 3.30E-03 | <i>POLD2</i>        | -0.765 | 3.30E-03 |
| <i>SPATA9</i>    | -0.633 | 3.30E-03 | <i>NT5C3L</i>       | -0.860 | 3.30E-03 |
| <i>FOXA1</i>     | -0.733 | 3.30E-03 | <i>NCF2</i>         | 1.155  | 3.40E-03 |
| <i>WDPCP</i>     | -0.743 | 3.30E-03 | <i>LCP2</i>         | 1.145  | 3.40E-03 |
| <i>MSI2</i>      | -0.752 | 3.30E-03 | <i>GPR65</i>        | 1.123  | 3.40E-03 |
| <i>RPS6KA6</i>   | -0.753 | 3.30E-03 | <i>CARD6</i>        | 1.083  | 3.40E-03 |
| <i>ANKRD35</i>   | -0.759 | 3.30E-03 | <i>NPL</i>          | 0.968  | 3.40E-03 |
| <i>NPHP1</i>     | -0.767 | 3.30E-03 | <i>MCTP1</i>        | 0.908  | 3.40E-03 |
| <i>SLC16A5</i>   | -0.785 | 3.30E-03 | <i>HIST1H2BO</i>    | -0.465 | 3.40E-03 |
| <i>RNF112</i>    | -0.794 | 3.30E-03 | <i>SIAH3</i>        | -0.487 | 3.40E-03 |
| <i>MST1P9</i>    | -0.795 | 3.30E-03 | <i>ZNF511</i>       | -0.580 | 3.40E-03 |
| <i>TMEM141</i>   | -0.800 | 3.30E-03 | <i>ACBD6</i>        | -0.580 | 3.40E-03 |
| <i>FAM210B</i>   | -0.802 | 3.30E-03 | <i>CTPS2</i>        | -0.588 | 3.40E-03 |
| <i>PLA2G12A</i>  | -0.805 | 3.30E-03 | <i>STRN</i>         | -0.590 | 3.40E-03 |
| <i>ABCB8</i>     | -0.824 | 3.30E-03 | <i>KIF12</i>        | -0.593 | 3.40E-03 |
| <i>DRD2</i>      | -0.832 | 3.30E-03 | <i>PUF60</i>        | -0.598 | 3.40E-03 |
| <i>COL28A1</i>   | -0.838 | 3.30E-03 | <i>TMEM54</i>       | -0.600 | 3.40E-03 |
| <i>RUNDC1</i>    | -0.840 | 3.30E-03 | <i>LOC100128292</i> | -0.600 | 3.40E-03 |
| <i>FLJ25328</i>  | -0.854 | 3.30E-03 | <i>NPEPL1</i>       | -0.605 | 3.40E-03 |
| <i>TRIQQ</i>     | -0.866 | 3.30E-03 | <i>NR2F6</i>        | -0.608 | 3.40E-03 |
| <i>TBC1D24</i>   | -0.870 | 3.30E-03 | <i>UBAP2</i>        | -0.610 | 3.40E-03 |
| <i>EPB41L5</i>   | -0.924 | 3.30E-03 | <i>DYX1C1</i>       | -0.620 | 3.40E-03 |
| <i>PLIN5</i>     | -0.951 | 3.30E-03 | <i>C1orf51</i>      | -0.633 | 3.40E-03 |
| <i>KIAA1244</i>  | -0.957 | 3.30E-03 | <i>IMMP1L</i>       | -0.637 | 3.40E-03 |
| <i>KIAA1467</i>  | -0.960 | 3.30E-03 | <i>GNAZ</i>         | -0.640 | 3.40E-03 |
| <i>SMIM1</i>     | -0.998 | 3.30E-03 | <i>GCFC2</i>        | -0.643 | 3.40E-03 |
| <i>CTDSPL</i>    | -1.032 | 3.30E-03 | <i>STRBP</i>        | -0.653 | 3.40E-03 |
| <i>NT5C3L</i>    | -1.046 | 3.30E-03 | <i>TMEM18</i>       | -0.667 | 3.40E-03 |
| <i>SNHG11</i>    | -1.095 | 3.30E-03 | <i>IPO9</i>         | -0.670 | 3.40E-03 |
| <i>TCEA3</i>     | -1.096 | 3.30E-03 | <i>MDH1B</i>        | -0.677 | 3.40E-03 |
| <i>ERBB3</i>     | -1.099 | 3.30E-03 | <i>TTC28-AS1</i>    | -0.720 | 3.40E-03 |
| <i>SUGT1P3</i>   | -1.130 | 3.30E-03 | <i>PDGFRL</i>       | 0.848  | 3.50E-03 |
| <i>KLHL6</i>     | 1.793  | 3.40E-03 | <i>FAM24B</i>       | -0.490 | 3.50E-03 |
| <i>LOC654433</i> | 0.419  | 3.40E-03 | <i>C1orf226</i>     | -0.520 | 3.50E-03 |
| <i>HOXC13</i>    | -0.707 | 3.40E-03 | <i>ZP4</i>          | -0.537 | 3.50E-03 |
| <i>FAM184B</i>   | -0.714 | 3.40E-03 | <i>ZNF165</i>       | -0.550 | 3.50E-03 |
| <i>PRSS35</i>    | -0.738 | 3.40E-03 | <i>PCGF1</i>        | -0.555 | 3.50E-03 |
| <i>LCE1B</i>     | -0.751 | 3.40E-03 | <i>FANCE</i>        | -0.563 | 3.50E-03 |
| <i>INPP5A</i>    | -0.785 | 3.40E-03 | <i>COBL</i>         | -0.563 | 3.50E-03 |
| <i>LOC728431</i> | -0.786 | 3.40E-03 | <i>FAM222A</i>      | -0.567 | 3.50E-03 |

|                     |        |          |                  |        |          |
|---------------------|--------|----------|------------------|--------|----------|
| <i>RAB17</i>        | -0.794 | 3.40E-03 | <i>RTKN</i>      | -0.583 | 3.50E-03 |
| <i>TMEM161B</i>     | -0.798 | 3.40E-03 | <i>WDR90</i>     | -0.587 | 3.50E-03 |
| <i>C6orf136</i>     | -0.799 | 3.40E-03 | <i>RFC5</i>      | -0.628 | 3.50E-03 |
| <i>PXMP4</i>        | -0.809 | 3.40E-03 | <i>MZT2A</i>     | -0.658 | 3.50E-03 |
| <i>HOXC11</i>       | -0.810 | 3.40E-03 | <i>CENPF</i>     | -0.673 | 3.50E-03 |
| <i>PRR22</i>        | -0.813 | 3.40E-03 | <i>CEP85</i>     | -0.678 | 3.50E-03 |
| <i>SPRED2</i>       | -0.851 | 3.40E-03 | <i>ZNF250</i>    | -0.683 | 3.50E-03 |
| <i>ARHGEF26</i>     | -0.872 | 3.40E-03 | <i>FBXO41</i>    | -0.685 | 3.50E-03 |
| <i>HSBP1L1</i>      | -0.885 | 3.40E-03 | <i>NRF1</i>      | -0.688 | 3.50E-03 |
| <i>KCTD6</i>        | -0.885 | 3.40E-03 | <i>GIMAP8</i>    | 1.093  | 3.60E-03 |
| <i>ZNF709</i>       | -0.886 | 3.40E-03 | <i>AKAP12</i>    | 0.940  | 3.60E-03 |
| <i>FLJ10661</i>     | -0.902 | 3.40E-03 | <i>EML6</i>      | -0.513 | 3.60E-03 |
| <i>FLJ90757</i>     | -0.905 | 3.40E-03 | <i>CHRAC1</i>    | -0.530 | 3.60E-03 |
| <i>MDH1B</i>        | -0.921 | 3.40E-03 | <i>WDPCP</i>     | -0.533 | 3.60E-03 |
| <i>TLE2</i>         | -0.942 | 3.40E-03 | <i>WNK3</i>      | -0.573 | 3.60E-03 |
| <i>HSD11B1L</i>     | -1.010 | 3.40E-03 | <i>TIGD3</i>     | -0.580 | 3.60E-03 |
| <i>KIF12</i>        | -1.073 | 3.40E-03 | <i>VPS37D</i>    | -0.583 | 3.60E-03 |
| <i>PARP14</i>       | 2.040  | 3.50E-03 | <i>NDUFAF4</i>   | -0.590 | 3.60E-03 |
| <i>BTN2A2</i>       | 1.569  | 3.50E-03 | <i>PFDN6</i>     | -0.593 | 3.60E-03 |
| <i>TMEM200A</i>     | 1.277  | 3.50E-03 | <i>TMEM143</i>   | -0.607 | 3.60E-03 |
| <i>EMB</i>          | 1.177  | 3.50E-03 | <i>LSM4</i>      | -0.608 | 3.60E-03 |
| <i>FAM46C</i>       | 1.041  | 3.50E-03 | <i>PSTK</i>      | -0.623 | 3.60E-03 |
| <i>HOMER2</i>       | -0.669 | 3.50E-03 | <i>C8orf82</i>   | -0.627 | 3.60E-03 |
| <i>WDR17</i>        | -0.728 | 3.50E-03 | <i>ZNF396</i>    | -0.643 | 3.60E-03 |
| <i>AP4M1</i>        | -0.734 | 3.50E-03 | <i>WDR60</i>     | -0.648 | 3.60E-03 |
| <i>NOXRED1</i>      | -0.735 | 3.50E-03 | <i>TRAIP</i>     | -0.648 | 3.60E-03 |
| <i>C1orf100</i>     | -0.737 | 3.50E-03 | <i>KIAA0895</i>  | -0.653 | 3.60E-03 |
| <i>FGFR3</i>        | -0.787 | 3.50E-03 | <i>GSTO2</i>     | -0.690 | 3.60E-03 |
| <i>ACSS2</i>        | -0.791 | 3.50E-03 | <i>MBLAC1</i>    | -0.697 | 3.60E-03 |
| <i>ZNF3</i>         | -0.794 | 3.50E-03 | <i>C16orf55</i>  | -0.697 | 3.60E-03 |
| <i>SERTAD4-AS1</i>  | -0.825 | 3.50E-03 | <i>CNKSRI</i>    | -0.790 | 3.60E-03 |
| <i>ALDH6A1</i>      | -0.852 | 3.50E-03 | <i>C1R</i>       | 1.185  | 3.70E-03 |
| <i>ZNF177</i>       | -0.858 | 3.50E-03 | <i>C2</i>        | 1.073  | 3.70E-03 |
| <i>BTBD9</i>        | -0.864 | 3.50E-03 | <i>HLA-DRB1</i>  | 1.038  | 3.70E-03 |
| <i>ZNF491</i>       | -0.868 | 3.50E-03 | <i>VEGFC</i>     | 1.028  | 3.70E-03 |
| <i>SLC25A35</i>     | -0.870 | 3.50E-03 | <i>CELF2</i>     | 0.968  | 3.70E-03 |
| <i>CCDC151</i>      | -0.899 | 3.50E-03 | <i>C16orf54</i>  | 0.843  | 3.70E-03 |
| <i>C17orf28</i>     | -0.903 | 3.50E-03 | <i>FAM70A</i>    | 0.505  | 3.70E-03 |
| <i>LOC100129794</i> | -1.147 | 3.50E-03 | <i>LRRC19</i>    | -0.438 | 3.70E-03 |
| <i>CREB3L4</i>      | -1.290 | 3.50E-03 | <i>RPS6KA6</i>   | -0.520 | 3.70E-03 |
| <i>ST8SIA4</i>      | 1.759  | 3.60E-03 | <i>MFSD4</i>     | -0.540 | 3.70E-03 |
| <i>SAMD3</i>        | 1.642  | 3.60E-03 | <i>COL28A1</i>   | -0.540 | 3.70E-03 |
| <i>CXorf61</i>      | 0.446  | 3.60E-03 | <i>TDH</i>       | -0.553 | 3.70E-03 |
| <i>FXYD4</i>        | -0.704 | 3.60E-03 | <i>LOC440356</i> | -0.563 | 3.70E-03 |
| <i>RPH3AL</i>       | -0.707 | 3.60E-03 | <i>MIPOL1</i>    | -0.573 | 3.70E-03 |
| <i>OR7E24</i>       | -0.734 | 3.60E-03 | <i>PGAP2</i>     | -0.583 | 3.70E-03 |
| <i>NALCN</i>        | -0.735 | 3.60E-03 | <i>SNX22</i>     | -0.583 | 3.70E-03 |
| <i>CHST10</i>       | -0.790 | 3.60E-03 | <i>LOC284889</i> | -0.583 | 3.70E-03 |
| <i>DUSP8</i>        | -0.800 | 3.60E-03 | <i>AFG3L2</i>    | -0.593 | 3.70E-03 |
| <i>SOGA1</i>        | -0.811 | 3.60E-03 | <i>KIF2C</i>     | -0.605 | 3.70E-03 |
| <i>TMEM9</i>        | -0.812 | 3.60E-03 | <i>ARL9</i>      | -0.617 | 3.70E-03 |

|                     |        |          |                  |        |          |
|---------------------|--------|----------|------------------|--------|----------|
| <i>LRRC48</i>       | -0.817 | 3.60E-03 | <i>PXMP2</i>     | -0.635 | 3.70E-03 |
| <i>ADPRHL1</i>      | -0.838 | 3.60E-03 | <i>DVL1</i>      | -0.643 | 3.70E-03 |
| <i>ADCY9</i>        | -0.865 | 3.60E-03 | <i>ZNF554</i>    | -0.737 | 3.70E-03 |
| <i>POMT2</i>        | -0.870 | 3.60E-03 | <i>CD93</i>      | 1.123  | 3.80E-03 |
| <i>LAMB2P1</i>      | -0.886 | 3.60E-03 | <i>CECR1</i>     | 1.000  | 3.80E-03 |
| <i>ZCWPW2</i>       | -0.889 | 3.60E-03 | <i>PLCL2</i>     | 0.858  | 3.80E-03 |
| <i>KRT18</i>        | -0.898 | 3.60E-03 | <i>CDC14C</i>    | -0.410 | 3.80E-03 |
| <i>GRK4</i>         | -0.962 | 3.60E-03 | <i>C7orf13</i>   | -0.467 | 3.80E-03 |
| <i>RHOD</i>         | -0.974 | 3.60E-03 | <i>HIST1H2BB</i> | -0.475 | 3.80E-03 |
| <i>GSTO2</i>        | -1.046 | 3.60E-03 | <i>TFAP2C</i>    | -0.508 | 3.80E-03 |
| <i>WDR60</i>        | -1.144 | 3.60E-03 | <i>TBL1X</i>     | -0.510 | 3.80E-03 |
| <i>ZNF396</i>       | -1.278 | 3.60E-03 | <i>BOLL</i>      | -0.543 | 3.80E-03 |
| <i>GIMAP7</i>       | 1.843  | 3.70E-03 | <i>WDYHV1</i>    | -0.560 | 3.80E-03 |
| <i>SLFN11</i>       | 1.665  | 3.70E-03 | <i>CECR5</i>     | -0.565 | 3.80E-03 |
| <i>KLHDC7B</i>      | 1.660  | 3.70E-03 | <i>36892</i>     | -0.577 | 3.80E-03 |
| <i>LAIR2</i>        | 0.990  | 3.70E-03 | <i>VPS72</i>     | -0.580 | 3.80E-03 |
| <i>IDI2</i>         | -0.623 | 3.70E-03 | <i>SCML2</i>     | -0.595 | 3.80E-03 |
| <i>PLA2G10</i>      | -0.631 | 3.70E-03 | <i>ZNF692</i>    | -0.695 | 3.80E-03 |
| <i>LETM2</i>        | -0.680 | 3.70E-03 | <i>C17orf69</i>  | -0.723 | 3.80E-03 |
| <i>ETNK2</i>        | -0.681 | 3.70E-03 | <i>FAM53A</i>    | -0.727 | 3.80E-03 |
| <i>FHDC1</i>        | -0.732 | 3.70E-03 | <i>FSTL1</i>     | 1.200  | 3.90E-03 |
| <i>MACROD2</i>      | -0.750 | 3.70E-03 | <i>GREM1</i>     | 0.868  | 3.90E-03 |
| <i>PAK6</i>         | -0.755 | 3.70E-03 | <i>ST3GAL5</i>   | 0.828  | 3.90E-03 |
| <i>MPP7</i>         | -0.759 | 3.70E-03 | <i>CYP4Z2P</i>   | 0.253  | 3.90E-03 |
| <i>DYX1C1</i>       | -0.775 | 3.70E-03 | <i>STK33</i>     | -0.500 | 3.90E-03 |
| <i>CNNM2</i>        | -0.781 | 3.70E-03 | <i>IBA57</i>     | -0.537 | 3.90E-03 |
| <i>SH3RF1</i>       | -0.792 | 3.70E-03 | <i>REPIN1</i>    | -0.538 | 3.90E-03 |
| <i>WDR31</i>        | -0.809 | 3.70E-03 | <i>TSNARE1</i>   | -0.550 | 3.90E-03 |
| <i>SRCIN1</i>       | -0.818 | 3.70E-03 | <i>CELSR2</i>    | -0.573 | 3.90E-03 |
| <i>CRNDE</i>        | -0.843 | 3.70E-03 | <i>GATAD2B</i>   | -0.573 | 3.90E-03 |
| <i>LOC284440</i>    | -0.846 | 3.70E-03 | <i>TMEM9</i>     | -0.577 | 3.90E-03 |
| <i>DVL1</i>         | -0.852 | 3.70E-03 | <i>FAM189B</i>   | -0.623 | 3.90E-03 |
| <i>MKS1</i>         | -0.853 | 3.70E-03 | <i>IL17RB</i>    | -0.660 | 3.90E-03 |
| <i>VPS52</i>        | -0.870 | 3.70E-03 | <i>SNHG15</i>    | -0.687 | 3.90E-03 |
| <i>CCDC106</i>      | -0.879 | 3.70E-03 | <i>GIMAP1</i>    | 1.083  | 4.00E-03 |
| <i>C1orf88</i>      | -0.956 | 3.70E-03 | <i>C5orf62</i>   | 0.833  | 4.00E-03 |
| <i>LOC145837</i>    | -0.971 | 3.70E-03 | <i>SLC22A3</i>   | 0.465  | 4.00E-03 |
| <i>ZNF554</i>       | -1.018 | 3.70E-03 | <i>LDHC</i>      | -0.495 | 4.00E-03 |
| <i>LILRB2</i>       | 1.949  | 3.80E-03 | <i>PPIL6</i>     | -0.510 | 4.00E-03 |
| <i>SLAMF8</i>       | 1.945  | 3.80E-03 | <i>RNF8</i>      | -0.530 | 4.00E-03 |
| <i>GCH1</i>         | 1.847  | 3.80E-03 | <i>HSBP1L1</i>   | -0.553 | 4.00E-03 |
| <i>RNF145</i>       | 1.256  | 3.80E-03 | <i>IQGAP3</i>    | -0.567 | 4.00E-03 |
| <i>SUCNR1</i>       | 1.060  | 3.80E-03 | <i>ASIC1</i>     | -0.573 | 4.00E-03 |
| <i>PDE4DIP</i>      | 0.864  | 3.80E-03 | <i>DUS4L</i>     | -0.615 | 4.00E-03 |
| <i>LRRC19</i>       | -0.587 | 3.80E-03 | <i>ASNS</i>      | -0.525 | 4.10E-03 |
| <i>PDZK1</i>        | -0.659 | 3.80E-03 | <i>DSCR6</i>     | -0.538 | 4.10E-03 |
| <i>RERG</i>         | -0.749 | 3.80E-03 | <i>PLD6</i>      | -0.543 | 4.10E-03 |
| <i>C17orf76-AS1</i> | -0.769 | 3.80E-03 | <i>C8orf49</i>   | -0.573 | 4.10E-03 |
| <i>GNAZ</i>         | -0.783 | 3.80E-03 | <i>POLE2</i>     | -0.580 | 4.10E-03 |
| <i>FMO5</i>         | -0.785 | 3.80E-03 | <i>TADA1</i>     | -0.587 | 4.10E-03 |
| <i>STH</i>          | -0.810 | 3.80E-03 | <i>CHAF1A</i>    | -0.638 | 4.10E-03 |

|                     |        |          |                     |        |          |
|---------------------|--------|----------|---------------------|--------|----------|
| <i>MPP2</i>         | -0.818 | 3.80E-03 | <i>EVI2B</i>        | 1.190  | 4.20E-03 |
| <i>KLHL26</i>       | -0.819 | 3.80E-03 | <i>LY86</i>         | 1.150  | 4.20E-03 |
| <i>NOP14-AS1</i>    | -0.829 | 3.80E-03 | <i>AP1S2</i>        | 0.998  | 4.20E-03 |
| <i>HHAT</i>         | -0.853 | 3.80E-03 | <i>SERTAD4</i>      | -0.503 | 4.20E-03 |
| <i>C17orf69</i>     | -0.917 | 3.80E-03 | <i>GLB1L2</i>       | -0.523 | 4.20E-03 |
| <i>C2orf63</i>      | -0.965 | 3.80E-03 | <i>FKBPL</i>        | -0.545 | 4.20E-03 |
| <i>ZNF692</i>       | -1.056 | 3.80E-03 | <i>RBFA</i>         | -0.573 | 4.20E-03 |
| <i>IRF8</i>         | 1.873  | 3.90E-03 | <i>OR52D1</i>       | -0.590 | 4.20E-03 |
| <i>CLEC12A</i>      | 1.444  | 3.90E-03 | <i>SEPT5</i>        | -0.600 | 4.20E-03 |
| <i>PCED1B</i>       | 1.393  | 3.90E-03 | <i>SSX2IP</i>       | -0.640 | 4.20E-03 |
| <i>CTTN</i>         | -0.730 | 3.90E-03 | <i>APITD1</i>       | -0.645 | 4.20E-03 |
| <i>CYB5D1</i>       | -0.737 | 3.90E-03 | <i>HLA-DMB</i>      | 1.118  | 4.30E-03 |
| <i>C20orf152</i>    | -0.743 | 3.90E-03 | <i>PRKCH</i>        | 0.905  | 4.30E-03 |
| <i>CASC1</i>        | -0.744 | 3.90E-03 | <i>MEOX2</i>        | 0.725  | 4.30E-03 |
| <i>ZNF596</i>       | -0.757 | 3.90E-03 | <i>C22orf23</i>     | -0.517 | 4.30E-03 |
| <i>C16orf45</i>     | -0.773 | 3.90E-03 | <i>UPP2</i>         | -0.547 | 4.30E-03 |
| <i>CSMD1</i>        | -0.780 | 3.90E-03 | <i>SOGA1</i>        | -0.547 | 4.30E-03 |
| <i>RING1</i>        | -0.814 | 3.90E-03 | <i>NOP14-AS1</i>    | -0.560 | 4.30E-03 |
| <i>LOC100132356</i> | -0.924 | 3.90E-03 | <i>CDK20</i>        | -0.560 | 4.30E-03 |
| <i>KIAA1324</i>     | -0.933 | 3.90E-03 | <i>SMIM1</i>        | -0.573 | 4.30E-03 |
| <i>BBS5</i>         | -0.938 | 3.90E-03 | <i>LOC100287482</i> | -0.640 | 4.30E-03 |
| <i>CC2D2A</i>       | -1.094 | 3.90E-03 | <i>HLA-DMA</i>      | 1.110  | 4.40E-03 |
| <i>RSPO3</i>        | 1.315  | 4.00E-03 | <i>LAT2</i>         | 1.025  | 4.40E-03 |
| <i>NLRP7</i>        | 0.682  | 4.00E-03 | <i>STAMBPL1</i>     | 0.907  | 4.40E-03 |
| <i>RASEF</i>        | -0.715 | 4.00E-03 | <i>NDN</i>          | 0.875  | 4.40E-03 |
| <i>AQP11</i>        | -0.729 | 4.00E-03 | <i>LMO2</i>         | 0.835  | 4.40E-03 |
| <i>FAM71F1</i>      | -0.745 | 4.00E-03 | <i>RAB36</i>        | -0.530 | 4.40E-03 |
| <i>PC</i>           | -0.752 | 4.00E-03 | <i>FLJ10661</i>     | -0.530 | 4.40E-03 |
| <i>MYB</i>          | -0.771 | 4.00E-03 | <i>TMEM241</i>      | -0.557 | 4.40E-03 |
| <i>TMEM134</i>      | -0.807 | 4.00E-03 | <i>WBSCR22</i>      | -0.570 | 4.40E-03 |
| <i>SLC25A4</i>      | -0.819 | 4.00E-03 | <i>AARS2</i>        | -0.570 | 4.40E-03 |
| <i>C9orf152</i>     | -0.908 | 4.00E-03 | <i>SEMA4F</i>       | -0.578 | 4.40E-03 |
| <i>PLEKHH1</i>      | -0.912 | 4.00E-03 | <i>USP39</i>        | -0.653 | 4.40E-03 |
| <i>LOC284023</i>    | -0.913 | 4.00E-03 | <i>TYROBP</i>       | 1.193  | 4.50E-03 |
| <i>ZHX3</i>         | -0.914 | 4.00E-03 | <i>NCKAP1L</i>      | 1.178  | 4.50E-03 |
| <i>TMEM8B</i>       | -1.017 | 4.00E-03 | <i>ITGAM</i>        | 1.125  | 4.50E-03 |
| <i>CLEC4A</i>       | 1.922  | 4.10E-03 | <i>HCLS1</i>        | 1.120  | 4.50E-03 |
| <i>GIMAP1</i>       | 1.874  | 4.10E-03 | <i>CPA3</i>         | 0.890  | 4.50E-03 |
| <i>CTLA4</i>        | 1.760  | 4.10E-03 | <i>STEAP1</i>       | 0.793  | 4.50E-03 |
| <i>RASSF5</i>       | 1.755  | 4.10E-03 | <i>SIX2</i>         | -0.503 | 4.50E-03 |
| <i>ZNF319</i>       | 1.076  | 4.10E-03 | <i>SLC41A3</i>      | -0.523 | 4.50E-03 |
| <i>NUDT4</i>        | -0.664 | 4.10E-03 | <i>WDR73</i>        | -0.548 | 4.50E-03 |
| <i>RAB15</i>        | -0.674 | 4.10E-03 | <i>NDUFAF6</i>      | -0.553 | 4.50E-03 |
| <i>KBTBD10</i>      | -0.752 | 4.10E-03 | <i>ERBB3</i>        | -0.573 | 4.50E-03 |
| <i>COQ7</i>         | -0.778 | 4.10E-03 | <i>ZNF777</i>       | -0.640 | 4.50E-03 |
| <i>CDAN1</i>        | -0.778 | 4.10E-03 | <i>TMEM68</i>       | -0.657 | 4.50E-03 |
| <i>SPIRE2</i>       | -0.782 | 4.10E-03 | <i>KIF9</i>         | -0.677 | 4.50E-03 |
| <i>CACNA2D2</i>     | -0.788 | 4.10E-03 | <i>FAM83H</i>       | -0.697 | 4.50E-03 |
| <i>ZNRF3</i>        | -0.788 | 4.10E-03 | <i>LPAR5</i>        | 0.683  | 4.60E-03 |
| <i>MST1</i>         | -0.845 | 4.10E-03 | <i>RAB9BP1</i>      | -0.445 | 4.60E-03 |
| <i>WNK4</i>         | -0.867 | 4.10E-03 | <i>MYO1H</i>        | -0.453 | 4.60E-03 |

|                  |        |          |                  |        |          |
|------------------|--------|----------|------------------|--------|----------|
| <i>PLAC8L1</i>   | -0.882 | 4.10E-03 | <i>ZSWIM3</i>    | -0.470 | 4.60E-03 |
| <i>CASP1</i>     | 2.007  | 4.20E-03 | <i>MANEAL</i>    | -0.507 | 4.60E-03 |
| <i>HLA-DQB1</i>  | 1.740  | 4.20E-03 | <i>CRCP</i>      | -0.523 | 4.60E-03 |
| <i>CLEC2D</i>    | 1.525  | 4.20E-03 | <i>SNAP47</i>    | -0.563 | 4.60E-03 |
| <i>SELE</i>      | 0.996  | 4.20E-03 | <i>HHEX</i>      | 0.730  | 4.70E-03 |
| <i>GCNT1</i>     | 0.708  | 4.20E-03 | <i>TFAP2A</i>    | -0.508 | 4.70E-03 |
| <i>RSPO2</i>     | -0.606 | 4.20E-03 | <i>SIMI</i>      | -0.520 | 4.70E-03 |
| <i>GLS2</i>      | -0.737 | 4.20E-03 | <i>SLC25A17</i>  | -0.545 | 4.70E-03 |
| <i>ZNF563</i>    | -0.751 | 4.20E-03 | <i>KIF3A</i>     | -0.565 | 4.70E-03 |
| <i>C7orf63</i>   | -0.763 | 4.20E-03 | <i>POLR2D</i>    | -0.580 | 4.70E-03 |
| <i>RHOB</i>      | -0.765 | 4.20E-03 | <i>LPXN</i>      | 1.058  | 4.80E-03 |
| <i>ZNF704</i>    | -0.776 | 4.20E-03 | <i>CHLI</i>      | 0.638  | 4.80E-03 |
| <i>TMEM143</i>   | -0.800 | 4.20E-03 | <i>GATC</i>      | -0.470 | 4.80E-03 |
| <i>SEMA4F</i>    | -0.869 | 4.20E-03 | <i>HFE2</i>      | -0.530 | 4.80E-03 |
| <i>TJP3</i>      | -0.912 | 4.20E-03 | <i>NT5C1A</i>    | -0.540 | 4.80E-03 |
| <i>SEPT5</i>     | -0.968 | 4.20E-03 | <i>LETMI</i>     | -0.568 | 4.80E-03 |
| <i>ARHGAP25</i>  | 1.919  | 4.30E-03 | <i>CENPH</i>     | -0.577 | 4.80E-03 |
| <i>APOC1</i>     | 1.182  | 4.30E-03 | <i>SURF2</i>     | -0.580 | 4.80E-03 |
| <i>HOXC9</i>     | -0.631 | 4.30E-03 | <i>CCR1</i>      | 1.138  | 4.90E-03 |
| <i>LCN12</i>     | -0.700 | 4.30E-03 | <i>HTRA4</i>     | 0.597  | 4.90E-03 |
| <i>THNSL2</i>    | -0.707 | 4.30E-03 | <i>PNPLA1</i>    | -0.490 | 4.90E-03 |
| <i>BNIP3</i>     | -0.716 | 4.30E-03 | <i>C17orf100</i> | -0.510 | 4.90E-03 |
| <i>ARHGAP32</i>  | -0.771 | 4.30E-03 | <i>MTMR12</i>    | -0.520 | 4.90E-03 |
| <i>LOC93622</i>  | -0.783 | 4.30E-03 | <i>HPDL</i>      | -0.550 | 4.90E-03 |
| <i>ATAT1</i>     | -0.797 | 4.30E-03 | <i>FOXK2</i>     | -0.558 | 4.90E-03 |
| <i>OSCP1</i>     | -0.871 | 4.30E-03 | <i>NUDT16L1</i>  | -0.567 | 4.90E-03 |
| <i>CPVL</i>      | 1.560  | 4.40E-03 | <i>DOCK10</i>    | 1.033  | 5.00E-03 |
| <i>TDO2</i>      | 1.047  | 4.40E-03 | <i>EPDR1</i>     | 0.703  | 5.00E-03 |
| <i>ARMC4</i>     | -0.652 | 4.40E-03 | <i>PPARG</i>     | 0.610  | 5.00E-03 |
| <i>NBPF3</i>     | -0.732 | 4.40E-03 | <i>UBE2U</i>     | -0.403 | 5.00E-03 |
| <i>NMNAT3</i>    | -0.774 | 4.40E-03 | <i>NEDD4L</i>    | -0.518 | 5.00E-03 |
| <i>PPP1R36</i>   | -0.881 | 4.40E-03 | <i>C3orf67</i>   | -0.537 | 5.00E-03 |
| <i>FPR3</i>      | 1.936  | 4.50E-03 | <i>NMNAT3</i>    | -0.550 | 5.00E-03 |
| <i>CD3D</i>      | 1.892  | 4.50E-03 | <i>ZNF687</i>    | -0.557 | 5.00E-03 |
| <i>ZNF740</i>    | -0.688 | 4.50E-03 | <i>RUVBL2</i>    | -0.683 | 5.00E-03 |
| <i>MGC16275</i>  | -0.688 | 4.50E-03 | <i>DOCK2</i>     | 1.105  | 5.10E-03 |
| <i>SIX2</i>      | -0.690 | 4.50E-03 | <i>EVI2A</i>     | 1.090  | 5.10E-03 |
| <i>DACH2</i>     | -0.700 | 4.50E-03 | <i>SGK1</i>      | 0.905  | 5.10E-03 |
| <i>PPP2R5A</i>   | -0.711 | 4.50E-03 | <i>P2RY14</i>    | 0.803  | 5.10E-03 |
| <i>LMAN2L</i>    | -0.745 | 4.50E-03 | <i>BTBD11</i>    | 0.363  | 5.10E-03 |
| <i>PIAS3</i>     | -0.752 | 4.50E-03 | <i>HIST1H3F</i>  | -0.485 | 5.10E-03 |
| <i>BMPRI1B</i>   | -0.753 | 4.50E-03 | <i>NUBP2</i>     | -0.575 | 5.10E-03 |
| <i>ULK2</i>      | -0.767 | 4.50E-03 | <i>SYCE3</i>     | -0.583 | 5.10E-03 |
| <i>PHLPP1</i>    | -0.771 | 4.50E-03 | <i>HLA-DPA1</i>  | 1.100  | 5.20E-03 |
| <i>DAK</i>       | -0.783 | 4.50E-03 | <i>PTPRE</i>     | 1.053  | 5.20E-03 |
| <i>C20orf132</i> | -0.788 | 4.50E-03 | <i>RARRES2</i>   | 0.945  | 5.20E-03 |
| <i>FAM83H</i>    | -0.867 | 4.50E-03 | <i>ADRA2A</i>    | 0.780  | 5.20E-03 |
| <i>ZBTB42</i>    | -0.893 | 4.50E-03 | <i>FAM105A</i>   | 0.725  | 5.20E-03 |
| <i>TMEM68</i>    | -1.007 | 4.50E-03 | <i>EGFL6</i>     | 0.648  | 5.20E-03 |
| <i>KIF9</i>      | -1.018 | 4.50E-03 | <i>LOC148709</i> | -0.513 | 5.20E-03 |
| <i>GIMAP4</i>    | 1.956  | 4.60E-03 | <i>MLF1</i>      | -0.530 | 5.20E-03 |

|                     |        |          |                  |        |          |
|---------------------|--------|----------|------------------|--------|----------|
| <i>FLVCR2</i>       | 1.302  | 4.60E-03 | <i>TCTEX1D2</i>  | -0.537 | 5.20E-03 |
| <i>LAG3</i>         | 1.301  | 4.60E-03 | <i>FAF1</i>      | -0.545 | 5.20E-03 |
| <i>ADA</i>          | 1.219  | 4.60E-03 | <i>PAM16</i>     | -0.745 | 5.20E-03 |
| <i>SLC39A8</i>      | 0.933  | 4.60E-03 | <i>IRF8</i>      | 1.013  | 5.30E-03 |
| <i>C5orf55</i>      | -0.706 | 4.60E-03 | <i>APBB1IP</i>   | 0.993  | 5.30E-03 |
| <i>TBR1</i>         | -0.724 | 4.60E-03 | <i>AKR1B1</i>    | 0.850  | 5.30E-03 |
| <i>NCKIPSD</i>      | -0.745 | 4.60E-03 | <i>FIGLA</i>     | -0.477 | 5.30E-03 |
| <i>ZG16B</i>        | -0.749 | 4.60E-03 | <i>LOC728819</i> | -0.503 | 5.30E-03 |
| <i>CTBP2</i>        | -0.757 | 4.60E-03 | <i>ST3GAL4</i>   | -0.513 | 5.30E-03 |
| <i>UNC119B</i>      | -0.762 | 4.60E-03 | <i>GJA10</i>     | -0.533 | 5.30E-03 |
| <i>ABCC8</i>        | -0.771 | 4.60E-03 | <i>ATP6V0E2</i>  | -0.553 | 5.30E-03 |
| <i>ACAP3</i>        | -0.795 | 4.60E-03 | <i>ADIG</i>      | -0.567 | 5.30E-03 |
| <i>CCDC24</i>       | -0.820 | 4.60E-03 | <i>SCARF1</i>    | 0.813  | 5.40E-03 |
| <i>CD48</i>         | 1.926  | 4.70E-03 | <i>PRR5L</i>     | 0.643  | 5.40E-03 |
| <i>GALM</i>         | 1.325  | 4.70E-03 | <i>C17orf104</i> | -0.447 | 5.40E-03 |
| <i>DHRS2</i>        | -0.609 | 4.70E-03 | <i>POLB</i>      | -0.498 | 5.40E-03 |
| <i>C22orf23</i>     | -0.693 | 4.70E-03 | <i>DTNB</i>      | -0.535 | 5.40E-03 |
| <i>ADAL</i>         | -0.713 | 4.70E-03 | <i>TARBP1</i>    | -0.555 | 5.40E-03 |
| <i>ZDHHC11</i>      | -0.731 | 4.70E-03 | <i>CHERP</i>     | -0.570 | 5.40E-03 |
| <i>FAM219B</i>      | -0.762 | 4.70E-03 | <i>IL33</i>      | 0.773  | 5.50E-03 |
| <i>FBXL2</i>        | -0.769 | 4.70E-03 | <i>VWDE</i>      | -0.487 | 5.50E-03 |
| <i>ZNF768</i>       | -0.779 | 4.70E-03 | <i>PLCB4</i>     | -0.490 | 5.50E-03 |
| <i>C6orf170</i>     | -0.782 | 4.70E-03 | <i>ZNF678</i>    | -0.527 | 5.50E-03 |
| <i>ATP1A1OS</i>     | -0.794 | 4.70E-03 | <i>NAP1L4</i>    | -0.553 | 5.50E-03 |
| <i>EPB41L4A-AS1</i> | -0.810 | 4.70E-03 | <i>COL6A3</i>    | 1.045  | 5.60E-03 |
| <i>CTSS</i>         | 2.062  | 4.80E-03 | <i>SLC7A7</i>    | 1.043  | 5.60E-03 |
| <i>TRIM69</i>       | 1.245  | 4.80E-03 | <i>LUM</i>       | 1.035  | 5.60E-03 |
| <i>TOX2</i>         | 0.843  | 4.80E-03 | <i>TMEM213</i>   | -0.417 | 5.60E-03 |
| <i>USP9Y</i>        | -0.554 | 4.80E-03 | <i>ALMS1</i>     | -0.578 | 5.60E-03 |
| <i>SCGB2A1</i>      | -0.610 | 4.80E-03 | <i>SH2B3</i>     | 1.050  | 5.70E-03 |
| <i>ULBP3</i>        | -0.611 | 4.80E-03 | <i>EMILIN2</i>   | 0.927  | 5.70E-03 |
| <i>HEATR4</i>       | -0.648 | 4.80E-03 | <i>SRG7</i>      | -0.433 | 5.70E-03 |
| <i>CGNL1</i>        | -0.708 | 4.80E-03 | <i>ELL3</i>      | -0.495 | 5.70E-03 |
| <i>RGNEF</i>        | -0.760 | 4.80E-03 | <i>HIST1H2AB</i> | -0.500 | 5.70E-03 |
| <i>DTX3L</i>        | 1.987  | 4.90E-03 | <i>CCDC11</i>    | -0.517 | 5.70E-03 |
| <i>HLA-DMB</i>      | 1.913  | 4.90E-03 | <i>NCAPG</i>     | -0.580 | 5.70E-03 |
| <i>CIQC</i>         | 1.811  | 4.90E-03 | <i>MPP1</i>      | 0.833  | 5.80E-03 |
| <i>CCL2</i>         | 1.759  | 4.90E-03 | <i>TXNDC5</i>    | 0.770  | 5.80E-03 |
| <i>BATF2</i>        | 1.661  | 4.90E-03 | <i>LPL</i>       | 0.633  | 5.80E-03 |
| <i>LOC643733</i>    | 1.330  | 4.90E-03 | <i>CLEC4C</i>    | 0.387  | 5.80E-03 |
| <i>L3MBTL4</i>      | 0.534  | 4.90E-03 | <i>KATNAL2</i>   | -0.480 | 5.80E-03 |
| <i>ZNF16</i>        | -0.696 | 4.90E-03 | <i>CHRM3</i>     | -0.483 | 5.80E-03 |
| <i>DOK7</i>         | -0.717 | 4.90E-03 | <i>CHTOP</i>     | -0.545 | 5.80E-03 |
| <i>FEM1A</i>        | -0.755 | 4.90E-03 | <i>PLAC8L1</i>   | -0.563 | 5.80E-03 |
| <i>CXXC11</i>       | -0.789 | 4.90E-03 | <i>ITGB3BP</i>   | -0.575 | 5.80E-03 |
| <i>LOC100271722</i> | -0.987 | 4.90E-03 | <i>BLM</i>       | -0.580 | 5.80E-03 |
| <i>TAP1</i>         | 2.020  | 5.00E-03 | <i>IGJ</i>       | 0.755  | 5.90E-03 |
| <i>TNFAIP3</i>      | 1.975  | 5.00E-03 | <i>HOPX</i>      | 0.598  | 5.90E-03 |
| <i>PIM2</i>         | 1.475  | 5.00E-03 | <i>COX7B2</i>    | 0.190  | 5.90E-03 |
| <i>LOC439949</i>    | 1.169  | 5.00E-03 | <i>TCP10L</i>    | -0.490 | 5.90E-03 |
| <i>GPRIN3</i>       | 0.835  | 5.00E-03 | <i>C1orf204</i>  | -0.513 | 5.90E-03 |

|                  |        |          |                  |        |          |
|------------------|--------|----------|------------------|--------|----------|
| <i>UBE2U</i>     | -0.542 | 5.00E-03 | <i>PDZD4</i>     | -0.563 | 5.90E-03 |
| <i>GPC4</i>      | -0.601 | 5.00E-03 | <i>DPYD</i>      | 1.120  | 6.00E-03 |
| <i>TAS2R5</i>    | -0.660 | 5.00E-03 | <i>TSHZ3</i>     | 1.007  | 6.00E-03 |
| <i>C17orf58</i>  | -0.741 | 5.00E-03 | <i>AOC3</i>      | 0.875  | 6.00E-03 |
| <i>EPB41L1</i>   | -0.754 | 5.00E-03 | <i>SLC47A1</i>   | 0.408  | 6.00E-03 |
| <i>PDPK1</i>     | -0.760 | 5.00E-03 | <i>CAMKMT</i>    | -0.490 | 6.00E-03 |
| <i>PCGF2</i>     | -0.786 | 5.00E-03 | <i>TMEM161A</i>  | -0.575 | 6.00E-03 |
| <i>SYCE3</i>     | -0.876 | 5.00E-03 | <i>MIS18A</i>    | -0.575 | 6.00E-03 |
| <i>HLA-DRA</i>   | 1.930  | 5.10E-03 | <i>CRISPLD2</i>  | 1.005  | 6.10E-03 |
| <i>BTLA</i>      | 1.457  | 5.10E-03 | <i>CYSLTR1</i>   | 0.870  | 6.10E-03 |
| <i>POU2AF1</i>   | 1.423  | 5.10E-03 | <i>SMOC2</i>     | 0.683  | 6.10E-03 |
| <i>CLECL1</i>    | 1.207  | 5.10E-03 | <i>LOC96610</i>  | 0.650  | 6.10E-03 |
| <i>PALD1</i>     | 0.851  | 5.10E-03 | <i>HIST1H2AM</i> | -0.495 | 6.10E-03 |
| <i>IGLL1</i>     | 0.572  | 5.10E-03 | <i>PHF16</i>     | -0.515 | 6.10E-03 |
| <i>RPL27A</i>    | -0.670 | 5.10E-03 | <i>MST1P9</i>    | -0.525 | 6.10E-03 |
| <i>PMS2P1</i>    | -0.688 | 5.10E-03 | <i>TMEM52</i>    | -0.537 | 6.10E-03 |
| <i>C3orf67</i>   | -0.738 | 5.10E-03 | <i>LAPTM5</i>    | 1.155  | 6.20E-03 |
| <i>WDR78</i>     | -0.768 | 5.10E-03 | <i>SLCO2B1</i>   | 1.080  | 6.20E-03 |
| <i>GNA11</i>     | -0.774 | 5.10E-03 | <i>ELTD1</i>     | 0.993  | 6.20E-03 |
| <i>MARCH4</i>    | -0.779 | 5.10E-03 | <i>CHRDL1</i>    | 0.765  | 6.20E-03 |
| <i>ATF7</i>      | -0.866 | 5.10E-03 | <i>PTGS1</i>     | 0.743  | 6.20E-03 |
| <i>C5orf20</i>   | 1.314  | 5.20E-03 | <i>SLC35F3</i>   | -0.417 | 6.20E-03 |
| <i>TXNDC5</i>    | 1.291  | 5.20E-03 | <i>ZDHHC23</i>   | -0.507 | 6.20E-03 |
| <i>MMP12</i>     | 1.136  | 5.20E-03 | <i>GDEP</i>      | -0.510 | 6.20E-03 |
| <i>LOC284801</i> | -0.554 | 5.20E-03 | <i>TIAL1</i>     | -0.523 | 6.20E-03 |
| <i>C1orf51</i>   | -0.627 | 5.20E-03 | <i>RHPN1-AS1</i> | -0.543 | 6.20E-03 |
| <i>FBXO36</i>    | -0.671 | 5.20E-03 | <i>PPM1E</i>     | -0.545 | 6.20E-03 |
| <i>EFR3B</i>     | -0.674 | 5.20E-03 | <i>LILRB2</i>    | 1.088  | 6.30E-03 |
| <i>LGALS2</i>    | 1.379  | 5.30E-03 | <i>ANTXR2</i>    | 1.087  | 6.30E-03 |
| <i>PIWIL4</i>    | 0.889  | 5.30E-03 | <i>E2F5</i>      | -0.520 | 6.30E-03 |
| <i>CHST2</i>     | 0.819  | 5.30E-03 | <i>LRFN4</i>     | -0.550 | 6.30E-03 |
| <i>GTSF1</i>     | 0.681  | 5.30E-03 | <i>TMEM8B</i>    | -0.570 | 6.30E-03 |
| <i>ANO5</i>      | -0.690 | 5.30E-03 | <i>PRSS35</i>    | -0.450 | 6.40E-03 |
| <i>NSUN7</i>     | -0.713 | 5.30E-03 | <i>CNGA4</i>     | -0.470 | 6.40E-03 |
| <i>ENPP1</i>     | -0.724 | 5.30E-03 | <i>HILPDA</i>    | -0.475 | 6.40E-03 |
| <i>REEP1</i>     | -0.771 | 5.30E-03 | <i>ZNF643</i>    | -0.515 | 6.40E-03 |
| <i>PBX1</i>      | -0.791 | 5.30E-03 | <i>ZNF544</i>    | -0.515 | 6.40E-03 |
| <i>C1orf162</i>  | 1.855  | 5.40E-03 | <i>LRRC73</i>    | -0.533 | 6.40E-03 |
| <i>HPSE</i>      | 1.295  | 5.40E-03 | <i>TAF4</i>      | -0.555 | 6.40E-03 |
| <i>CCDC71L</i>   | 1.167  | 5.40E-03 | <i>FAM181A</i>   | -0.563 | 6.40E-03 |
| <i>NFE2L3</i>    | 1.052  | 5.40E-03 | <i>C7orf55</i>   | -0.570 | 6.40E-03 |
| <i>PPP1R14C</i>  | 0.808  | 5.40E-03 | <i>NT5E</i>      | 0.888  | 6.50E-03 |
| <i>IL12A</i>     | 0.435  | 5.40E-03 | <i>LAYN</i>      | 0.887  | 6.50E-03 |
| <i>CST1</i>      | 0.431  | 5.40E-03 | <i>TMCC3</i>     | 0.660  | 6.50E-03 |
| <i>TNNT1</i>     | -0.660 | 5.40E-03 | <i>IL31RA</i>    | -0.490 | 6.50E-03 |
| <i>SPAG17</i>    | -0.661 | 5.40E-03 | <i>CCSAP</i>     | -0.493 | 6.50E-03 |
| <i>SHPK</i>      | -0.697 | 5.40E-03 | <i>SOX4</i>      | -0.513 | 6.50E-03 |
| <i>LYPD6</i>     | -0.707 | 5.40E-03 | <i>RHEB</i>      | -0.515 | 6.50E-03 |
| <i>OTUD7B</i>    | -0.734 | 5.40E-03 | <i>LOC401588</i> | -0.517 | 6.50E-03 |
| <i>RAI1</i>      | -0.764 | 5.40E-03 | <i>TM6SF1</i>    | 0.948  | 6.60E-03 |
| <i>RIBC1</i>     | -0.776 | 5.40E-03 | <i>ITM2A</i>     | 0.830  | 6.60E-03 |



|                  |        |          |                  |        |          |
|------------------|--------|----------|------------------|--------|----------|
| <i>RAB11FIP4</i> | -0.787 | 5.40E-03 | <i>RAP2B</i>     | 0.610  | 6.60E-03 |
| <i>GPR65</i>     | 1.882  | 5.50E-03 | <i>HSD17B11</i>  | 1.078  | 6.70E-03 |
| <i>C1QB</i>      | 1.837  | 5.50E-03 | <i>CTSL1</i>     | 0.975  | 6.70E-03 |
| <i>EOMES</i>     | 1.207  | 5.50E-03 | <i>MILR1</i>     | 0.760  | 6.70E-03 |
| <i>C3orf80</i>   | 0.476  | 5.50E-03 | <i>RSPO3</i>     | 0.733  | 6.70E-03 |
| <i>DCD</i>       | -0.659 | 5.50E-03 | <i>C18orf54</i>  | -0.563 | 6.70E-03 |
| <i>DLX1</i>      | -0.674 | 5.50E-03 | <i>SAMSN1</i>    | 1.020  | 6.80E-03 |
| <i>PLD6</i>      | -0.699 | 5.50E-03 | <i>CFH</i>       | 0.973  | 6.80E-03 |
| <i>CAMK2N1</i>   | -0.706 | 5.50E-03 | <i>TBXAS1</i>    | 0.958  | 6.80E-03 |
| <i>C1QTNF4</i>   | -0.752 | 5.50E-03 | <i>SUPV3L1</i>   | -0.540 | 6.80E-03 |
| <i>TMEM101</i>   | -0.771 | 5.50E-03 | <i>AKAP1</i>     | -0.563 | 6.80E-03 |
| <i>PYROXD2</i>   | -0.775 | 5.50E-03 | <i>IGFBP6</i>    | 1.005  | 6.90E-03 |
| <i>KCTD3</i>     | -0.795 | 5.50E-03 | <i>TFEC</i>      | 0.928  | 6.90E-03 |
| <i>IL18R1</i>    | 1.314  | 5.60E-03 | <i>GPX3</i>      | 0.805  | 6.90E-03 |
| <i>C15orf48</i>  | 1.263  | 5.60E-03 | <i>BBS5</i>      | -0.437 | 6.90E-03 |
| <i>RASGEF1A</i>  | 0.517  | 5.60E-03 | <i>ARHGEF26</i>  | -0.468 | 6.90E-03 |
| <i>MYO1H</i>     | -0.593 | 5.60E-03 | <i>AS3MT</i>     | -0.540 | 6.90E-03 |
| <i>LOC284889</i> | -0.692 | 5.60E-03 | <i>SRGN</i>      | 1.155  | 7.00E-03 |
| <i>C20orf26</i>  | -0.709 | 5.60E-03 | <i>COL15A1</i>   | 0.923  | 7.00E-03 |
| <i>FAM200B</i>   | -0.766 | 5.60E-03 | <i>LXN</i>       | 0.808  | 7.00E-03 |
| <i>EARS2</i>     | -0.775 | 5.60E-03 | <i>WBP2NL</i>    | -0.427 | 7.00E-03 |
| <i>LOC646762</i> | -0.885 | 5.60E-03 | <i>LINC00461</i> | -0.487 | 7.00E-03 |
| <i>SH3KBP1</i>   | 1.377  | 5.70E-03 | <i>INTS8</i>     | -0.535 | 7.00E-03 |
| <i>NCKAP5</i>    | -0.621 | 5.70E-03 | <i>CEP78</i>     | -0.553 | 7.00E-03 |
| <i>C11orf88</i>  | -0.639 | 5.70E-03 | <i>BRCA1</i>     | -0.570 | 7.00E-03 |
| <i>COPG2</i>     | -0.669 | 5.70E-03 | <i>KCNK5</i>     | -0.445 | 7.10E-03 |
| <i>CRCP</i>      | -0.678 | 5.70E-03 | <i>SUGT1P3</i>   | -0.453 | 7.10E-03 |
| <i>PDE8B</i>     | -0.697 | 5.70E-03 | <i>CABLES2</i>   | -0.500 | 7.10E-03 |
| <i>LNX1</i>      | -0.736 | 5.70E-03 | <i>COL3A1</i>    | 1.058  | 7.20E-03 |
| <i>PIAS4</i>     | -0.783 | 5.70E-03 | <i>LOC441666</i> | -0.407 | 7.20E-03 |
| <i>C1QA</i>      | 1.840  | 5.80E-03 | <i>ZSWIM1</i>    | -0.483 | 7.20E-03 |
| <i>CLEC7A</i>    | 1.781  | 5.80E-03 | <i>ZNF706</i>    | -0.493 | 7.20E-03 |
| <i>TIFAB</i>     | 1.654  | 5.80E-03 | <i>ITGB2</i>     | 1.133  | 7.30E-03 |
| <i>TMEM51</i>    | 1.100  | 5.80E-03 | <i>DSE</i>       | 1.095  | 7.30E-03 |
| <i>TNIP3</i>     | 0.912  | 5.80E-03 | <i>FLII</i>      | 1.055  | 7.30E-03 |
| <i>LIPG</i>      | 0.829  | 5.80E-03 | <i>SDPR</i>      | 0.755  | 7.30E-03 |
| <i>SYTL5</i>     | -0.551 | 5.80E-03 | <i>CECR7</i>     | -0.463 | 7.30E-03 |
| <i>SYBU</i>      | -0.680 | 5.80E-03 | <i>ATP8B5P</i>   | -0.473 | 7.30E-03 |
| <i>PPIP5K1</i>   | -0.696 | 5.80E-03 | <i>LRRC1</i>     | -0.498 | 7.30E-03 |
| <i>ZMYND12</i>   | -0.747 | 5.80E-03 | <i>TMEM67</i>    | -0.547 | 7.30E-03 |
| <i>C17orf108</i> | -0.794 | 5.80E-03 | <i>DIEXF</i>     | -0.548 | 7.30E-03 |
| <i>ADCY6</i>     | -0.795 | 5.80E-03 | <i>HRAS</i>      | -0.575 | 7.30E-03 |
| <i>CD300LF</i>   | 1.781  | 5.90E-03 | <i>PDGFRA</i>    | 1.020  | 7.40E-03 |
| <i>THEMIS</i>    | 1.553  | 5.90E-03 | <i>KLHL6</i>     | 0.920  | 7.40E-03 |
| <i>CCL18</i>     | 1.474  | 5.90E-03 | <i>OLR1</i>      | 0.670  | 7.40E-03 |
| <i>CMTM8</i>     | -0.661 | 5.90E-03 | <i>ID3</i>       | 0.613  | 7.40E-03 |
| <i>WBSCR27</i>   | -0.728 | 5.90E-03 | <i>MEOX1</i>     | 0.543  | 7.40E-03 |
| <i>FAM53A</i>    | -0.740 | 5.90E-03 | <i>C1orf56</i>   | -0.468 | 7.40E-03 |
| <i>HERC5</i>     | 1.601  | 6.00E-03 | <i>C1S</i>       | 1.110  | 7.50E-03 |
| <i>P2RY14</i>    | 1.253  | 6.00E-03 | <i>HLA-DPBI</i>  | 0.983  | 7.50E-03 |
| <i>MMP1</i>      | 1.094  | 6.00E-03 | <i>VCAN</i>      | 0.950  | 7.50E-03 |

|                   |        |          |                  |        |          |
|-------------------|--------|----------|------------------|--------|----------|
| <i>NUAK2</i>      | 0.954  | 6.00E-03 | <i>POSTN</i>     | 0.925  | 7.50E-03 |
| <i>ST6GALNAC5</i> | 0.946  | 6.00E-03 | <i>ZNF423</i>    | 0.753  | 7.50E-03 |
| <i>GRIK4</i>      | -0.631 | 6.00E-03 | <i>PCED1B</i>    | 0.723  | 7.50E-03 |
| <i>IRX5</i>       | -0.642 | 6.00E-03 | <i>MMD</i>       | 0.690  | 7.50E-03 |
| <i>PRKAA2</i>     | -0.701 | 6.00E-03 | <i>PDLIM1</i>    | 0.673  | 7.50E-03 |
| <i>IQCH</i>       | -0.710 | 6.00E-03 | <i>HIST1H3B</i>  | -0.493 | 7.50E-03 |
| <i>RIMS1</i>      | -0.730 | 6.00E-03 | <i>FRAT2</i>     | -0.525 | 7.50E-03 |
| <i>SUDS3</i>      | -0.761 | 6.00E-03 | <i>ARHGAP15</i>  | 1.005  | 7.60E-03 |
| <i>EPN3</i>       | -0.761 | 6.00E-03 | <i>FCGR3B</i>    | 0.773  | 7.60E-03 |
| <i>ST6GAL1</i>    | 1.190  | 6.10E-03 | <i>FLT1</i>      | 0.720  | 7.60E-03 |
| <i>COL22A1</i>    | 0.884  | 6.10E-03 | <i>PIP4K2A</i>   | 0.708  | 7.60E-03 |
| <i>DISP1</i>      | -0.690 | 6.10E-03 | <i>PPAPDC1A</i>  | 0.663  | 7.60E-03 |
| <i>ENPP5</i>      | -0.715 | 6.10E-03 | <i>TNFSF4</i>    | 0.655  | 7.60E-03 |
| <i>GPR98</i>      | -0.741 | 6.10E-03 | <i>ANGPT2</i>    | 0.535  | 7.60E-03 |
| <i>XAF1</i>       | 1.893  | 6.20E-03 | <i>UMODL1</i>    | -0.420 | 7.60E-03 |
| <i>LPXN</i>       | 1.821  | 6.20E-03 | <i>FAM81A</i>    | -0.467 | 7.60E-03 |
| <i>RSAD2</i>      | 1.763  | 6.20E-03 | <i>QRICH2</i>    | -0.480 | 7.60E-03 |
| <i>CAPZA3</i>     | -0.515 | 6.20E-03 | <i>RAVER2</i>    | -0.493 | 7.60E-03 |
| <i>ADAM32</i>     | -0.620 | 6.20E-03 | <i>PPOX</i>      | -0.558 | 7.60E-03 |
| <i>MGC2752</i>    | -0.695 | 6.20E-03 | <i>CFD</i>       | 0.850  | 7.70E-03 |
| <i>FDXR</i>       | -0.724 | 6.20E-03 | <i>NLRC3</i>     | 0.797  | 7.70E-03 |
| <i>BCDIN3D</i>    | -0.726 | 6.20E-03 | <i>RGCC</i>      | 0.655  | 7.70E-03 |
| <i>SPDEF</i>      | -0.808 | 6.20E-03 | <i>CASZ1</i>     | -0.545 | 7.70E-03 |
| <i>FGL2</i>       | 1.878  | 6.30E-03 | <i>IFFO1</i>     | 1.028  | 7.80E-03 |
| <i>WARS</i>       | 1.844  | 6.30E-03 | <i>VGLL3</i>     | 0.953  | 7.80E-03 |
| <i>IL4I1</i>      | 1.779  | 6.30E-03 | <i>MFAP5</i>     | 0.870  | 7.80E-03 |
| <i>ALOX5</i>      | 1.773  | 6.30E-03 | <i>SOX7</i>      | 0.507  | 7.80E-03 |
| <i>TCF7</i>       | 1.074  | 6.30E-03 | <i>RNF32</i>     | -0.438 | 7.80E-03 |
| <i>ATP1B4</i>     | -0.612 | 6.30E-03 | <i>KAZN</i>      | -0.488 | 7.80E-03 |
| <i>ABHD1</i>      | -0.725 | 6.30E-03 | <i>TRPS1</i>     | -0.495 | 7.80E-03 |
| <i>PROM2</i>      | -0.752 | 6.30E-03 | <i>RIBC2</i>     | -0.513 | 7.80E-03 |
| <i>TRAT1</i>      | 1.610  | 6.40E-03 | <i>ATG4D</i>     | -0.557 | 7.80E-03 |
| <i>P2RX5</i>      | 1.073  | 6.40E-03 | <i>KRBA1</i>     | -0.573 | 7.80E-03 |
| <i>KLRC3</i>      | 0.571  | 6.40E-03 | <i>DCN</i>       | 1.195  | 7.90E-03 |
| <i>C16orf55</i>   | -0.720 | 6.40E-03 | <i>SUCNR1</i>    | 0.593  | 7.90E-03 |
| <i>ZNF20</i>      | -0.743 | 6.40E-03 | <i>HIST3H3</i>   | -0.448 | 7.90E-03 |
| <i>SEMA4D</i>     | 1.543  | 6.50E-03 | <i>MCF2L-AS1</i> | -0.505 | 7.90E-03 |
| <i>PCDHB13</i>    | -0.546 | 6.50E-03 | <i>DLEU1</i>     | -0.543 | 7.90E-03 |
| <i>ZNF77</i>      | -0.649 | 6.50E-03 | <i>MKS1</i>      | -0.553 | 7.90E-03 |
| <i>SLC25A27</i>   | -0.779 | 6.50E-03 | <i>SIGLEC1</i>   | 1.063  | 8.00E-03 |
| <i>CSAD</i>       | -0.796 | 6.50E-03 | <i>ARHGAP25</i>  | 1.048  | 8.00E-03 |
| <i>AS3MT</i>      | -0.959 | 6.50E-03 | <i>TCF4</i>      | 0.978  | 8.00E-03 |
| <i>CD2</i>        | 1.920  | 6.60E-03 | <i>CMTM3</i>     | 0.970  | 8.00E-03 |
| <i>COL6A6</i>     | 0.783  | 6.60E-03 | <i>GAS1</i>      | 0.888  | 8.00E-03 |
| <i>CHRM3</i>      | -0.634 | 6.60E-03 | <i>HLA-DRB6</i>  | 0.795  | 8.00E-03 |
| <i>RFESD</i>      | -0.712 | 6.60E-03 | <i>CRTAM</i>     | 0.770  | 8.00E-03 |
| <i>WHSC2</i>      | -0.778 | 6.60E-03 | <i>TRMT12</i>    | -0.490 | 8.00E-03 |
| <i>TRIM22</i>     | 2.018  | 6.70E-03 | <i>PTPRC</i>     | 1.118  | 8.10E-03 |
| <i>HLA-DPA1</i>   | 1.858  | 6.70E-03 | <i>OLFML3</i>    | 1.033  | 8.10E-03 |
| <i>CD96</i>       | 1.696  | 6.70E-03 | <i>HAVCR2</i>    | 1.007  | 8.10E-03 |
| <i>NR1H3</i>      | 1.271  | 6.70E-03 | <i>SLC9A9</i>    | 0.940  | 8.10E-03 |

|                  |        |          |                 |        |          |
|------------------|--------|----------|-----------------|--------|----------|
| <i>BCL11B</i>    | 1.155  | 6.70E-03 | <i>RHOXF1</i>   | -0.463 | 8.10E-03 |
| <i>TRABD2A</i>   | 0.834  | 6.70E-03 | <i>CEP41</i>    | -0.540 | 8.10E-03 |
| <i>HIST3H3</i>   | -0.618 | 6.70E-03 | <i>CTSC</i>     | 0.948  | 8.20E-03 |
| <i>FLJ33630</i>  | -0.678 | 6.70E-03 | <i>ANK2</i>     | 0.858  | 8.20E-03 |
| <i>PTGR2</i>     | -0.744 | 6.70E-03 | <i>CCDC69</i>   | 0.790  | 8.20E-03 |
| <i>NRBP2</i>     | -0.764 | 6.70E-03 | <i>RBP4</i>     | 0.468  | 8.20E-03 |
| <i>DHRS4-AS1</i> | -0.782 | 6.70E-03 | <i>STPG1</i>    | -0.410 | 8.20E-03 |
| <i>ULK1</i>      | -0.801 | 6.70E-03 | <i>POLH</i>     | -0.470 | 8.20E-03 |
| <i>EMILIN2</i>   | 1.581  | 6.80E-03 | <i>FCER1G</i>   | 1.100  | 8.30E-03 |
| <i>SYK</i>       | 1.465  | 6.80E-03 | <i>G0S2</i>     | 0.730  | 8.30E-03 |
| <i>SLC2A5</i>    | 1.043  | 6.80E-03 | <i>APOC1</i>    | 0.653  | 8.30E-03 |
| <i>P2RY1</i>     | -0.591 | 6.80E-03 | <i>TIGD4</i>    | -0.493 | 8.30E-03 |
| <i>ZNF555</i>    | -0.656 | 6.80E-03 | <i>SEC14L5</i>  | -0.500 | 8.30E-03 |
| <i>EEF1A2</i>    | -0.699 | 6.80E-03 | <i>MAP7</i>     | -0.510 | 8.30E-03 |
| <i>GIMAP6</i>    | 1.719  | 6.90E-03 | <i>GTDC2</i>    | -0.513 | 8.30E-03 |
| <i>RCSA1</i>     | 1.645  | 6.90E-03 | <i>ARL8A</i>    | -0.517 | 8.30E-03 |
| <i>CLIC2</i>     | 1.607  | 6.90E-03 | <i>FYN</i>      | 0.915  | 8.40E-03 |
| <i>GPR155</i>    | 1.460  | 6.90E-03 | <i>PPAP2B</i>   | 0.883  | 8.40E-03 |
| <i>FKBP11</i>    | 1.190  | 6.90E-03 | <i>MANIC1</i>   | 0.853  | 8.40E-03 |
| <i>SLITRK4</i>   | -0.539 | 6.90E-03 | <i>FOXO1</i>    | 0.845  | 8.40E-03 |
| <i>CYP4X1</i>    | -0.633 | 6.90E-03 | <i>DACT1</i>    | 0.715  | 8.40E-03 |
| <i>STK16</i>     | -0.672 | 6.90E-03 | <i>PLAC8</i>    | 0.698  | 8.40E-03 |
| <i>BCL7A</i>     | -0.719 | 6.90E-03 | <i>CXCR7</i>    | 0.633  | 8.40E-03 |
| <i>ZNF609</i>    | -0.779 | 6.90E-03 | <i>MAEL</i>     | 0.257  | 8.40E-03 |
| <i>CD274</i>     | 1.555  | 7.00E-03 | <i>FSD1L</i>    | -0.463 | 8.40E-03 |
| <i>ATP6V1B1</i>  | -0.633 | 7.00E-03 | <i>BTBD6</i>    | -0.483 | 8.40E-03 |
| <i>PPP1R3C</i>   | -0.737 | 7.00E-03 | <i>SLC4A3</i>   | -0.525 | 8.40E-03 |
| <i>HOXC8</i>     | -0.744 | 7.00E-03 | <i>MMAB</i>     | -0.530 | 8.40E-03 |
| <i>CD8A</i>      | 1.762  | 7.10E-03 | <i>SEPT7P2</i>  | -0.540 | 8.40E-03 |
| <i>STAT4</i>     | 1.705  | 7.10E-03 | <i>ITGA4</i>    | 0.918  | 8.50E-03 |
| <i>SELL</i>      | 1.680  | 7.10E-03 | <i>GAL3ST4</i>  | 0.645  | 8.50E-03 |
| <i>DAPP1</i>     | 1.582  | 7.10E-03 | <i>XIST</i>     | 0.383  | 8.50E-03 |
| <i>ARHGAP39</i>  | -0.731 | 7.10E-03 | <i>UTY</i>      | -0.393 | 8.50E-03 |
| <i>BTN3A2</i>    | 1.808  | 7.20E-03 | <i>C6orf118</i> | -0.470 | 8.50E-03 |
| <i>GAL3ST4</i>   | 0.977  | 7.20E-03 | <i>DNMT3A</i>   | -0.493 | 8.50E-03 |
| <i>CRIL</i>      | 0.863  | 7.20E-03 | <i>DAND5</i>    | -0.517 | 8.50E-03 |
| <i>BHLHE41</i>   | 0.826  | 7.20E-03 | <i>NT5M</i>     | -0.558 | 8.50E-03 |
| <i>SPINK13</i>   | -0.574 | 7.20E-03 | <i>TLR7</i>     | 0.928  | 8.60E-03 |
| <i>HIST1H1T</i>  | -0.628 | 7.20E-03 | <i>MMRN1</i>    | 0.598  | 8.60E-03 |
| <i>CCDC11</i>    | -0.688 | 7.20E-03 | <i>TAS2R9</i>   | -0.465 | 8.60E-03 |
| <i>SSR4P1</i>    | -0.689 | 7.20E-03 | <i>RFESD</i>    | -0.503 | 8.60E-03 |
| <i>BAG3</i>      | -0.744 | 7.20E-03 | <i>MORN4</i>    | -0.507 | 8.60E-03 |
| <i>POLE</i>      | -0.799 | 7.20E-03 | <i>THNSL1</i>   | -0.525 | 8.60E-03 |
| <i>EVI2B</i>     | 1.928  | 7.30E-03 | <i>SPON1</i>    | 0.893  | 8.70E-03 |
| <i>TNFAIP8</i>   | 1.714  | 7.30E-03 | <i>PDGFD</i>    | 0.780  | 8.70E-03 |
| <i>MB21D1</i>    | 1.350  | 7.30E-03 | <i>ERICH1</i>   | 0.503  | 8.70E-03 |
| <i>MAB21L3</i>   | -0.553 | 7.30E-03 | <i>ULBP1</i>    | -0.393 | 8.70E-03 |
| <i>GPR111</i>    | -0.603 | 7.30E-03 | <i>DEPDC4</i>   | -0.477 | 8.70E-03 |
| <i>CAB39L</i>    | -0.623 | 7.30E-03 | <i>EPSTI1</i>   | 0.990  | 8.80E-03 |
| <i>LEFTY1</i>    | -0.630 | 7.30E-03 | <i>ERG</i>      | 0.840  | 8.80E-03 |
| <i>MAP3K12</i>   | -0.761 | 7.30E-03 | <i>CGREF1</i>   | -0.473 | 8.80E-03 |

|                  |        |          |                   |        |          |
|------------------|--------|----------|-------------------|--------|----------|
| <i>GPR174</i>    | 0.937  | 7.40E-03 | <i>C1orf87</i>    | -0.490 | 8.80E-03 |
| <i>HORMAD1</i>   | 0.398  | 7.40E-03 | <i>BNIP3</i>      | -0.493 | 8.80E-03 |
| <i>TMEM63C</i>   | -0.691 | 7.40E-03 | <i>CDH24</i>      | -0.523 | 8.80E-03 |
| <i>LOH12CR2</i>  | -0.723 | 7.40E-03 | <i>GPR116</i>     | 0.863  | 8.90E-03 |
| <i>DSTYK</i>     | -0.734 | 7.40E-03 | <i>CD1D</i>       | 0.670  | 8.90E-03 |
| <i>TXNRD2</i>    | -0.748 | 7.40E-03 | <i>XG</i>         | 0.490  | 8.90E-03 |
| <i>PHKA2</i>     | -0.765 | 7.40E-03 | <i>TBX15</i>      | 0.463  | 8.90E-03 |
| <i>SNX10</i>     | 1.619  | 7.50E-03 | <i>SAMHD1</i>     | 0.908  | 9.00E-03 |
| <i>SLC22A3</i>   | 0.472  | 7.50E-03 | <i>IL18</i>       | 0.653  | 9.00E-03 |
| <i>SLC44A5</i>   | -0.572 | 7.50E-03 | <i>SPP1</i>       | 0.583  | 9.00E-03 |
| <i>KATNAL2</i>   | -0.616 | 7.50E-03 | <i>FLVCR1-AS1</i> | -0.430 | 9.00E-03 |
| <i>ZACN</i>      | -0.627 | 7.50E-03 | <i>NOL10</i>      | -0.518 | 9.00E-03 |
| <i>PER2</i>      | -0.699 | 7.50E-03 | <i>HOOK2</i>      | -0.525 | 9.00E-03 |
| <i>IFI44L</i>    | 1.822  | 7.60E-03 | <i>TMEM61</i>     | -0.530 | 9.00E-03 |
| <i>ITK</i>       | 1.694  | 7.60E-03 | <i>PAQR6</i>      | -0.533 | 9.00E-03 |
| <i>CXorf21</i>   | 1.297  | 7.60E-03 | <i>ZNF133</i>     | -0.555 | 9.00E-03 |
| <i>CXorf65</i>   | 1.272  | 7.60E-03 | <i>TMUB1</i>      | -0.573 | 9.00E-03 |
| <i>CHST11</i>    | 1.213  | 7.60E-03 | <i>LPAR6</i>      | 0.945  | 9.10E-03 |
| <i>BBOX1</i>     | 0.722  | 7.60E-03 | <i>RASSF5</i>     | 0.873  | 9.10E-03 |
| <i>FAM227B</i>   | -0.507 | 7.60E-03 | <i>CTSZ</i>       | 0.833  | 9.10E-03 |
| <i>FSIP2</i>     | -0.599 | 7.60E-03 | <i>RSPO2</i>      | -0.397 | 9.10E-03 |
| <i>SLAMF7</i>    | 1.718  | 7.70E-03 | <i>PHF13</i>      | -0.490 | 9.10E-03 |
| <i>SCML4</i>     | 1.363  | 7.70E-03 | <i>DLX6</i>       | -0.503 | 9.10E-03 |
| <i>EPHA7</i>     | -0.658 | 7.70E-03 | <i>GPSM1</i>      | -0.553 | 9.10E-03 |
| <i>PHF13</i>     | -0.691 | 7.70E-03 | <i>CLIC2</i>      | 0.878  | 9.20E-03 |
| <i>AFF3</i>      | -0.703 | 7.70E-03 | <i>TMEM37</i>     | 0.763  | 9.20E-03 |
| <i>INTU</i>      | -0.714 | 7.70E-03 | <i>CNKSR2</i>     | -0.458 | 9.20E-03 |
| <i>LATS1</i>     | -0.716 | 7.70E-03 | <i>SNORA74A</i>   | -0.537 | 9.20E-03 |
| <i>RRNAD1</i>    | -0.778 | 7.70E-03 | <i>FAP</i>        | 1.003  | 9.30E-03 |
| <i>DOCK10</i>    | 1.715  | 7.80E-03 | <i>LYZ</i>        | 0.850  | 9.30E-03 |
| <i>BCL2A1</i>    | 1.699  | 7.80E-03 | <i>KIAA0226L</i>  | 0.635  | 9.30E-03 |
| <i>IFNG</i>      | 1.314  | 7.80E-03 | <i>BHLHE41</i>    | 0.563  | 9.30E-03 |
| <i>HIST1H2BA</i> | -0.475 | 7.80E-03 | <i>HOMER2</i>     | -0.400 | 9.30E-03 |
| <i>ANXA9</i>     | -0.696 | 7.80E-03 | <i>SIPA1L3</i>    | -0.465 | 9.30E-03 |
| <i>FBXO15</i>    | -0.728 | 7.80E-03 | <i>DLG3</i>       | -0.498 | 9.30E-03 |
| <i>SLC19A2</i>   | -0.738 | 7.80E-03 | <i>SETDB1</i>     | -0.543 | 9.30E-03 |
| <i>ZFYVE21</i>   | -0.745 | 7.80E-03 | <i>SEBOX</i>      | -0.563 | 9.30E-03 |
| <i>BRF1</i>      | -0.803 | 7.80E-03 | <i>CTSB</i>       | 1.150  | 9.40E-03 |
| <i>IFI16</i>     | 1.933  | 7.90E-03 | <i>CD86</i>       | 1.068  | 9.40E-03 |
| <i>FYB</i>       | 1.910  | 7.90E-03 | <i>PIK3AP1</i>    | 0.883  | 9.40E-03 |
| <i>LAT2</i>      | 1.716  | 7.90E-03 | <i>NEFH</i>       | 0.338  | 9.40E-03 |
| <i>PCDH20</i>    | -0.574 | 7.90E-03 | <i>MGC16275</i>   | -0.417 | 9.40E-03 |
| <i>TTC28-AS1</i> | -0.648 | 7.90E-03 | <i>DACH2</i>      | -0.463 | 9.40E-03 |
| <i>MAPKBP1</i>   | -0.752 | 7.90E-03 | <i>HIST1H1E</i>   | -0.468 | 9.40E-03 |
| <i>HLA-DMA</i>   | 1.852  | 8.00E-03 | <i>MARCH1</i>     | 0.930  | 9.50E-03 |
| <i>IFI27</i>     | 1.605  | 8.00E-03 | <i>APOE</i>       | 0.813  | 9.50E-03 |
| <i>IGFLR1</i>    | 1.563  | 8.00E-03 | <i>LOC643733</i>  | 0.690  | 9.50E-03 |
| <i>EAF2</i>      | 1.214  | 8.00E-03 | <i>CST1</i>       | 0.273  | 9.50E-03 |
| <i>FAM105B</i>   | 1.028  | 8.00E-03 | <i>TMPRSS12</i>   | -0.470 | 9.50E-03 |
| <i>SLC17A8</i>   | -0.600 | 8.00E-03 | <i>C19orf52</i>   | -0.517 | 9.50E-03 |
| <i>H19</i>       | -0.604 | 8.00E-03 | <i>TNFRSF1B</i>   | 1.050  | 9.60E-03 |

|                 |        |          |                     |        |          |
|-----------------|--------|----------|---------------------|--------|----------|
| <i>SYCP3</i>    | -0.610 | 8.00E-03 | <i>HLA-DRA</i>      | 1.003  | 9.60E-03 |
| <i>IQCF5</i>    | -0.692 | 8.00E-03 | <i>P2RY13</i>       | 0.968  | 9.60E-03 |
| <i>BTBD17</i>   | -0.722 | 8.00E-03 | <i>STAT4</i>        | 0.915  | 9.60E-03 |
| <i>DCTN2</i>    | -0.741 | 8.00E-03 | <i>ERAP2</i>        | 0.573  | 9.60E-03 |
| <i>IL10RA</i>   | 1.942  | 8.10E-03 | <i>LAMP5</i>        | 0.465  | 9.60E-03 |
| <i>ARHGAP9</i>  | 1.884  | 8.10E-03 | <i>ZNF607</i>       | -0.490 | 9.60E-03 |
| <i>PAQR9</i>    | -0.609 | 8.10E-03 | <i>GPANK1</i>       | -0.490 | 9.60E-03 |
| <i>CLVS1</i>    | -0.674 | 8.10E-03 | <i>TSTD1</i>        | -0.510 | 9.60E-03 |
| <i>PHYHD1</i>   | -0.693 | 8.10E-03 | <i>NEIL3</i>        | -0.555 | 9.60E-03 |
| <i>GSTCD</i>    | -0.734 | 8.10E-03 | <i>EZH2</i>         | -0.570 | 9.60E-03 |
| <i>ANKRD23</i>  | -0.747 | 8.10E-03 | <i>LINC00476</i>    | -0.447 | 9.70E-03 |
| <i>PLCD3</i>    | -0.755 | 8.10E-03 | <i>C6orf136</i>     | -0.540 | 9.70E-03 |
| <i>PAG1</i>     | 1.312  | 8.20E-03 | <i>NUDT14</i>       | -0.543 | 9.70E-03 |
| <i>PLBD1</i>    | 1.131  | 8.20E-03 | <i>BTK</i>          | 0.980  | 9.80E-03 |
| <i>PSTPIP2</i>  | 0.947  | 8.20E-03 | <i>C1orf54</i>      | 0.873  | 9.80E-03 |
| <i>KCNN2</i>    | -0.566 | 8.20E-03 | <i>SNX18</i>        | 0.467  | 9.80E-03 |
| <i>C4orf47</i>  | -0.645 | 8.20E-03 | <i>TBC1D22B</i>     | -0.463 | 9.80E-03 |
| <i>HCN2</i>     | -0.761 | 8.20E-03 | <i>LOC100129794</i> | -0.480 | 9.80E-03 |
| <i>PAM16</i>    | -0.789 | 8.20E-03 | <i>DPH2</i>         | -0.565 | 9.80E-03 |
| <i>AOAH</i>     | 1.725  | 8.30E-03 | <i>C5AR1</i>        | 0.923  | 9.90E-03 |
| <i>NAPSB</i>    | 1.659  | 8.30E-03 | <i>HLA-DQB1</i>     | 0.868  | 9.90E-03 |
| <i>HCG26</i>    | 1.449  | 8.30E-03 | <i>MAP3K5</i>       | 0.833  | 9.90E-03 |
| <i>MICB</i>     | 1.338  | 8.30E-03 | <i>HTR2B</i>        | 0.585  | 9.90E-03 |
| <i>TEX14</i>    | -0.605 | 8.30E-03 | <i>KCTD1</i>        | -0.427 | 9.90E-03 |
| <i>FAM59A</i>   | -0.656 | 8.30E-03 | <i>CCDC147</i>      | -0.487 | 9.90E-03 |
| <i>C6orf226</i> | -0.748 | 8.30E-03 | <i>POLR3H</i>       | -0.557 | 9.90E-03 |
| <i>PTCHD2</i>   | -0.784 | 8.30E-03 | <i>IGSF6</i>        | 0.960  | 1.00E-02 |
| <i>HLA-F</i>    | 1.985  | 8.40E-03 | <i>GTSF1</i>        | 0.387  | 1.00E-02 |
| <i>IFIT3</i>    | 1.910  | 8.40E-03 | <i>LRRC8E</i>       | -0.485 | 1.00E-02 |
| <i>NCF2</i>     | 1.882  | 8.40E-03 | <i>DHRS9</i>        | 0.753  | 1.01E-02 |
| <i>MERTK</i>    | 0.768  | 8.40E-03 | <i>CXorf59</i>      | -0.500 | 1.01E-02 |
| <i>CXCL5</i>    | 0.717  | 8.40E-03 | <i>BDH1</i>         | -0.523 | 1.01E-02 |
| <i>C1orf150</i> | -0.499 | 8.40E-03 | <i>CCDC58</i>       | -0.533 | 1.01E-02 |
| <i>CCDC7</i>    | -0.562 | 8.40E-03 | <i>LPAR1</i>        | 0.840  | 1.02E-02 |
| <i>FAM149A</i>  | -0.605 | 8.40E-03 | <i>CA8</i>          | -0.390 | 1.02E-02 |
| <i>METTLL2</i>  | -0.652 | 8.40E-03 | <i>GPRIN2</i>       | -0.493 | 1.02E-02 |
| <i>GREB1</i>    | -0.657 | 8.40E-03 | <i>TCEA3</i>        | -0.503 | 1.02E-02 |
| <i>STK32C</i>   | -0.729 | 8.40E-03 | <i>CLEC4A</i>       | 0.983  | 1.03E-02 |
| <i>PPM1E</i>    | -0.729 | 8.40E-03 | <i>TEX26</i>        | -0.433 | 1.03E-02 |
| <i>VIPR1</i>    | -0.752 | 8.40E-03 | <i>SERTAD4-AS1</i>  | -0.450 | 1.03E-02 |
| <i>ATXN2</i>    | -0.756 | 8.40E-03 | <i>ESYT3</i>        | -0.490 | 1.03E-02 |
| <i>ARHGEF37</i> | -0.758 | 8.40E-03 | <i>ZNF398</i>       | -0.497 | 1.03E-02 |
| <i>C8orf82</i>  | -0.780 | 8.40E-03 | <i>NID2</i>         | 0.863  | 1.04E-02 |
| <i>PLK5</i>     | -0.804 | 8.40E-03 | <i>SLC16A7</i>      | 0.610  | 1.04E-02 |
| <i>UBE2L6</i>   | 1.910  | 8.50E-03 | <i>LOC283481</i>    | -0.480 | 1.04E-02 |
| <i>PPP2R2D</i>  | -0.594 | 8.50E-03 | <i>ZNRF3</i>        | -0.500 | 1.04E-02 |
| <i>MFAP3L</i>   | -0.598 | 8.50E-03 | <i>OTUB1</i>        | -0.568 | 1.04E-02 |
| <i>ICA1L</i>    | -0.670 | 8.50E-03 | <i>EXO1</i>         | -0.575 | 1.04E-02 |
| <i>ADAMTS13</i> | -0.799 | 8.50E-03 | <i>SYNE1</i>        | 0.935  | 1.05E-02 |
| <i>LAPTM5</i>   | 1.948  | 8.60E-03 | <i>KIAA1462</i>     | 0.843  | 1.05E-02 |
| <i>CCR2</i>     | 1.804  | 8.60E-03 | <i>LMO4</i>         | -0.395 | 1.05E-02 |

|                  |        |          |                  |        |          |
|------------------|--------|----------|------------------|--------|----------|
| <i>ITGA4</i>     | 1.582  | 8.60E-03 | <i>SPAG17</i>    | -0.447 | 1.05E-02 |
| <i>COL4A4</i>    | 0.899  | 8.60E-03 | <i>CYP39A1</i>   | -0.450 | 1.05E-02 |
| <i>AGPHD1</i>    | -0.636 | 8.60E-03 | <i>HSF2BP</i>    | -0.470 | 1.05E-02 |
| <i>IQCF1</i>     | -0.662 | 8.60E-03 | <i>VAR52</i>     | -0.533 | 1.05E-02 |
| <i>IQCK</i>      | -0.682 | 8.60E-03 | <i>LDB2</i>      | 0.910  | 1.06E-02 |
| <i>SMAD9</i>     | -0.688 | 8.60E-03 | <i>RGS18</i>     | 0.810  | 1.06E-02 |
| <i>PPP2R2C</i>   | -0.711 | 8.60E-03 | <i>BCAT1</i>     | 0.653  | 1.06E-02 |
| <i>DOCK2</i>     | 1.791  | 8.70E-03 | <i>HOXA9</i>     | 0.225  | 1.06E-02 |
| <i>TAP2</i>      | 1.652  | 8.70E-03 | <i>ZBTB3</i>     | -0.457 | 1.06E-02 |
| <i>GPR171</i>    | 1.567  | 8.70E-03 | <i>FAM71F1</i>   | -0.510 | 1.06E-02 |
| <i>APOBEC3F</i>  | 0.890  | 8.70E-03 | <i>ZDHHC16</i>   | -0.530 | 1.06E-02 |
| <i>KLRC4</i>     | 0.505  | 8.70E-03 | <i>ABI3BP</i>    | 0.850  | 1.07E-02 |
| <i>CDC14C</i>    | -0.482 | 8.70E-03 | <i>PARP8</i>     | 0.805  | 1.07E-02 |
| <i>DNAL1I</i>    | -0.643 | 8.70E-03 | <i>SLC2A5</i>    | 0.615  | 1.07E-02 |
| <i>IGSF22</i>    | -0.670 | 8.70E-03 | <i>KLHDC10</i>   | -0.440 | 1.07E-02 |
| <i>NME5</i>      | -0.704 | 8.70E-03 | <i>NOXRED1</i>   | -0.447 | 1.07E-02 |
| <i>ZNF19</i>     | -0.715 | 8.70E-03 | <i>FLJ30679</i>  | -0.490 | 1.07E-02 |
| <i>RNASE6</i>    | 1.738  | 8.80E-03 | <i>ABCB9</i>     | -0.533 | 1.07E-02 |
| <i>MX2</i>       | 1.686  | 8.80E-03 | <i>CXXC11</i>    | -0.557 | 1.07E-02 |
| <i>FCGR2B</i>    | 1.540  | 8.80E-03 | <i>HEG1</i>      | 1.030  | 1.08E-02 |
| <i>STAP1</i>     | 1.288  | 8.80E-03 | <i>PDK4</i>      | 0.740  | 1.08E-02 |
| <i>TBL1X</i>     | -0.616 | 8.80E-03 | <i>RALBP1</i>    | -0.430 | 1.08E-02 |
| <i>CLGN</i>      | -0.623 | 8.80E-03 | <i>UNC80</i>     | -0.490 | 1.08E-02 |
| <i>ICAI</i>      | -0.631 | 8.80E-03 | <i>LOC388796</i> | -0.513 | 1.08E-02 |
| <i>CCDC125</i>   | -0.655 | 8.80E-03 | <i>BZW2</i>      | -0.528 | 1.08E-02 |
| <i>LOC728485</i> | -0.763 | 8.80E-03 | <i>EPAS1</i>     | 0.990  | 1.09E-02 |
| <i>CELF2</i>     | 1.451  | 8.90E-03 | <i>ST8SIA4</i>   | 0.840  | 1.09E-02 |
| <i>RABGAP1L</i>  | 1.446  | 8.90E-03 | <i>ZSWIM2</i>    | -0.430 | 1.09E-02 |
| <i>CD163L1</i>   | 0.562  | 8.90E-03 | <i>TMEM74</i>    | -0.457 | 1.09E-02 |
| <i>LAMA1</i>     | 0.472  | 8.90E-03 | <i>SLC6A8</i>    | -0.508 | 1.09E-02 |
| <i>C10orf113</i> | 0.254  | 8.90E-03 | <i>DPT</i>       | 0.988  | 1.10E-02 |
| <i>UGT1A6</i>    | -0.599 | 8.90E-03 | <i>PEAR1</i>     | 0.763  | 1.10E-02 |
| <i>SCGB1D2</i>   | -0.618 | 8.90E-03 | <i>SEL1L3</i>    | 0.645  | 1.10E-02 |
| <i>RTTN</i>      | -0.711 | 8.90E-03 | <i>FREMI</i>     | 0.460  | 1.10E-02 |
| <i>TLR1</i>      | 1.791  | 9.00E-03 | <i>TAS2R8</i>    | -0.493 | 1.10E-02 |
| <i>ADRB2</i>     | 0.827  | 9.00E-03 | <i>ZMYND12</i>   | -0.510 | 1.10E-02 |
| <i>IL20RA</i>    | -0.634 | 9.00E-03 | <i>DSTYK</i>     | -0.515 | 1.10E-02 |
| <i>KIAA0319</i>  | -0.635 | 9.00E-03 | <i>TAF2</i>      | -0.565 | 1.10E-02 |
| <i>CCDC30</i>    | -0.661 | 9.00E-03 | <i>CCDC80</i>    | 1.070  | 1.11E-02 |
| <i>CNKSR1</i>    | -0.681 | 9.00E-03 | <i>C3</i>        | 0.883  | 1.11E-02 |
| <i>TMEM54</i>    | -0.712 | 9.00E-03 | <i>LIMA1</i>     | 0.860  | 1.11E-02 |
| <i>UPP2</i>      | -0.721 | 9.00E-03 | <i>EHD4</i>      | 0.850  | 1.11E-02 |
| <i>ELMO3</i>     | -0.732 | 9.00E-03 | <i>FLJ40852</i>  | -0.453 | 1.11E-02 |
| <i>LETM1</i>     | -0.755 | 9.00E-03 | <i>TCHP</i>      | -0.483 | 1.11E-02 |
| <i>LAP3</i>      | 1.875  | 9.10E-03 | <i>LONRF2</i>    | -0.503 | 1.11E-02 |
| <i>HLA-DPBI</i>  | 1.632  | 9.10E-03 | <i>FANCF</i>     | -0.528 | 1.11E-02 |
| <i>RUNX3</i>     | 1.489  | 9.10E-03 | <i>IFI16</i>     | 1.078  | 1.12E-02 |
| <i>TMEM176B</i>  | 1.185  | 9.10E-03 | <i>FTL</i>       | 0.948  | 1.12E-02 |
| <i>FAM105A</i>   | 0.940  | 9.10E-03 | <i>BEND7</i>     | -0.437 | 1.12E-02 |
| <i>PPIL6</i>     | -0.570 | 9.10E-03 | <i>FAM84B</i>    | -0.450 | 1.12E-02 |
| <i>YBEY</i>      | -0.650 | 9.10E-03 | <i>EBF1</i>      | 0.863  | 1.13E-02 |

|           |        |          |             |        |          |
|-----------|--------|----------|-------------|--------|----------|
| ZNF76     | -0.755 | 9.10E-03 | FPR3        | 0.993  | 1.14E-02 |
| EMR2      | 1.382  | 9.20E-03 | ROR2        | 0.595  | 1.14E-02 |
| GNG2      | 1.355  | 9.20E-03 | LEP         | 0.510  | 1.14E-02 |
| PNOC      | 1.058  | 9.20E-03 | RBBP9       | -0.425 | 1.14E-02 |
| ZDHC15    | -0.576 | 9.20E-03 | ZNF252P-AS1 | -0.507 | 1.14E-02 |
| SERPINB11 | -0.600 | 9.20E-03 | C11orf49    | -0.518 | 1.14E-02 |
| PIEZO2    | -0.618 | 9.20E-03 | OLFML1      | 0.978  | 1.15E-02 |
| SLC4A3    | -0.711 | 9.20E-03 | ALOX5AP     | 0.950  | 1.15E-02 |
| HCLS1     | 1.853  | 9.30E-03 | ADCY7       | 0.898  | 1.15E-02 |
| SIGLEC10  | 1.624  | 9.30E-03 | CXorf21     | 0.743  | 1.15E-02 |
| GGTA1P    | 1.249  | 9.30E-03 | NEK6        | 0.680  | 1.15E-02 |
| CD226     | 1.128  | 9.30E-03 | ZNF77       | -0.430 | 1.15E-02 |
| RSPH4A    | -0.580 | 9.30E-03 | GJA9        | -0.475 | 1.15E-02 |
| LOC728819 | -0.618 | 9.30E-03 | ANO8        | -0.517 | 1.15E-02 |
| TNNI3     | -0.667 | 9.30E-03 | POLG2       | -0.538 | 1.15E-02 |
| DTWD2     | -0.690 | 9.30E-03 | SPARCL1     | 0.938  | 1.16E-02 |
| TIGD3     | -0.730 | 9.30E-03 | HSD11B1     | 0.640  | 1.16E-02 |
| IFI44     | 1.870  | 9.40E-03 | MMP3        | 0.485  | 1.16E-02 |
| LACC1     | 1.351  | 9.40E-03 | EYA3        | -0.435 | 1.16E-02 |
| ELMO1     | 1.057  | 9.40E-03 | GRTP1       | -0.470 | 1.16E-02 |
| ALDH1A1   | 0.894  | 9.40E-03 | PRUNE       | -0.498 | 1.16E-02 |
| CACNG1    | -0.754 | 9.40E-03 | SLC25A15    | -0.520 | 1.16E-02 |
| ARHGAP15  | 1.716  | 9.50E-03 | TXNL4A      | -0.543 | 1.16E-02 |
| MS4A4A    | 1.663  | 9.50E-03 | PUS7        | -0.568 | 1.16E-02 |
| SMAP2     | 1.382  | 9.50E-03 | LBH         | 0.680  | 1.17E-02 |
| LY75      | 1.346  | 9.50E-03 | ADRBK2      | 0.578  | 1.17E-02 |
| CCL13     | 1.345  | 9.50E-03 | TRIM6       | 0.513  | 1.17E-02 |
| COQ6      | -0.657 | 9.50E-03 | TRABD2A     | 0.483  | 1.17E-02 |
| UBE2D4    | -0.706 | 9.50E-03 | RANBP17     | -0.428 | 1.17E-02 |
| LGMN      | 1.295  | 9.60E-03 | CD14        | 1.040  | 1.18E-02 |
| RGS1      | 1.207  | 9.60E-03 | CCL8        | 0.723  | 1.18E-02 |
| RASGRP3   | 1.191  | 9.60E-03 | IQGAP2      | 0.628  | 1.18E-02 |
| HOTAIR    | -0.489 | 9.60E-03 | FAM176C     | 0.420  | 1.18E-02 |
| UTY       | -0.512 | 9.60E-03 | ELOVL4      | -0.440 | 1.18E-02 |
| VSIG10    | -0.621 | 9.60E-03 | PROKR2      | -0.500 | 1.18E-02 |
| PRF1      | 1.734  | 9.70E-03 | NNMT        | 0.955  | 1.19E-02 |
| RTP4      | 1.657  | 9.70E-03 | SYT11       | 0.780  | 1.19E-02 |
| ARL4C     | 1.090  | 9.70E-03 | ITGBL1      | 0.763  | 1.19E-02 |
| TMEM241   | -0.586 | 9.70E-03 | HOXB2       | 0.373  | 1.19E-02 |
| LGR6      | -0.591 | 9.70E-03 | XPNPEP3     | -0.425 | 1.19E-02 |
| GREB1L    | -0.698 | 9.70E-03 | CYBB        | 1.030  | 1.20E-02 |
| IKZF1     | 1.814  | 9.80E-03 | ZNF490      | -0.457 | 1.20E-02 |
| SP140L    | 1.377  | 9.80E-03 | BSPRY       | -0.488 | 1.20E-02 |
| FMNL2     | 1.131  | 9.80E-03 | SPC25       | -0.568 | 1.21E-02 |
| GFI1      | 1.120  | 9.80E-03 | SAPCD1      | -0.580 | 1.21E-02 |
| CASP8     | 1.118  | 9.80E-03 | GPR183      | 0.870  | 1.22E-02 |
| HLA-DQB2  | 1.044  | 9.80E-03 | PCLO        | -0.530 | 1.22E-02 |
| ROBO1     | 0.997  | 9.80E-03 | IL7R        | 0.895  | 1.23E-02 |
| KCNRG     | -0.529 | 9.80E-03 | CYTIP       | 0.895  | 1.23E-02 |
| ABHD12B   | -0.530 | 9.80E-03 | PROS1       | 0.878  | 1.23E-02 |
| ARSG      | -0.570 | 9.80E-03 | ABCA6       | 0.843  | 1.23E-02 |

|                   |        |          |                  |        |          |
|-------------------|--------|----------|------------------|--------|----------|
| <i>ARHGEF5</i>    | -0.607 | 9.80E-03 | <i>CHSY3</i>     | 0.667  | 1.23E-02 |
| <i>FNTB</i>       | -0.639 | 9.80E-03 | <i>KLC4</i>      | -0.527 | 1.23E-02 |
| <i>TMEM18</i>     | -0.655 | 9.80E-03 | <i>LSP1</i>      | 0.993  | 1.24E-02 |
| <i>MYO5C</i>      | -0.681 | 9.80E-03 | <i>ADAM12</i>    | 0.925  | 1.24E-02 |
| <i>TP53TG1</i>    | -0.772 | 9.80E-03 | <i>TOX2</i>      | 0.430  | 1.24E-02 |
| <i>CYB5D2</i>     | -0.780 | 9.80E-03 | <i>C2orf15</i>   | -0.453 | 1.24E-02 |
| <i>OAS2</i>       | 1.794  | 9.90E-03 | <i>B4GALT3</i>   | -0.473 | 1.24E-02 |
| <i>IL18BP</i>     | 1.581  | 9.90E-03 | <i>FAM198B</i>   | 0.868  | 1.25E-02 |
| <i>LOC285548</i>  | -0.590 | 9.90E-03 | <i>CD28</i>      | 0.793  | 1.25E-02 |
| <i>RADIL</i>      | -0.655 | 9.90E-03 | <i>ALDH2</i>     | 0.793  | 1.25E-02 |
| <i>CMTM4</i>      | -0.661 | 9.90E-03 | <i>TIE1</i>      | 0.658  | 1.25E-02 |
| <i>C16orf92</i>   | -0.733 | 9.90E-03 | <i>MTMR7</i>     | -0.403 | 1.25E-02 |
| <i>PARP15</i>     | 1.164  | 1.00E-02 | <i>REG1A</i>     | -0.420 | 1.25E-02 |
| <i>ST3GAL5</i>    | 0.995  | 1.00E-02 | <i>NSUN4</i>     | -0.440 | 1.25E-02 |
| <i>DDX3Y</i>      | -0.507 | 1.00E-02 | <i>MLLT4-AS1</i> | -0.540 | 1.25E-02 |
| <i>FAM84B</i>     | -0.627 | 1.00E-02 | <i>CDH5</i>      | 0.795  | 1.26E-02 |
| <i>CD163</i>      | 1.740  | 1.01E-02 | <i>VCAM1</i>     | 0.778  | 1.26E-02 |
| <i>CXCR6</i>      | 1.710  | 1.01E-02 | <i>ST6GAL1</i>   | 0.623  | 1.26E-02 |
| <i>CECR1</i>      | 1.510  | 1.01E-02 | <i>CAV1</i>      | 0.938  | 1.27E-02 |
| <i>TRIM14</i>     | 1.244  | 1.01E-02 | <i>EMR2</i>      | 0.780  | 1.27E-02 |
| <i>DUSP2</i>      | 0.934  | 1.01E-02 | <i>TDRD9</i>     | 0.213  | 1.27E-02 |
| <i>TNFSF4</i>     | 0.879  | 1.01E-02 | <i>SFT2D3</i>    | -0.470 | 1.27E-02 |
| <i>LRRK1</i>      | 0.879  | 1.01E-02 | <i>KPTN</i>      | -0.488 | 1.27E-02 |
| <i>KLRF1</i>      | 0.695  | 1.01E-02 | <i>SMG7</i>      | -0.513 | 1.27E-02 |
| <i>CLDN23</i>     | 0.634  | 1.01E-02 | <i>CD4</i>       | 1.028  | 1.29E-02 |
| <i>SLC35F3</i>    | -0.512 | 1.01E-02 | <i>CLEC12A</i>   | 0.663  | 1.29E-02 |
| <i>ZNF34</i>      | -0.628 | 1.01E-02 | <i>PLIN2</i>     | 0.583  | 1.29E-02 |
| <i>ANO10</i>      | -0.655 | 1.01E-02 | <i>UNC5CL</i>    | -0.473 | 1.29E-02 |
| <i>FHIT</i>       | -0.661 | 1.01E-02 | <i>HOXC11</i>    | -0.488 | 1.29E-02 |
| <i>TRAK1</i>      | -0.693 | 1.01E-02 | <i>SALL3</i>     | -0.503 | 1.29E-02 |
| <i>IFT43</i>      | -0.745 | 1.01E-02 | <i>C7orf53</i>   | -0.513 | 1.29E-02 |
| <i>MIRLET7BHG</i> | -0.750 | 1.01E-02 | <i>ZNF653</i>    | -0.517 | 1.29E-02 |
| <i>SLA</i>        | 1.885  | 1.02E-02 | <i>AXL</i>       | 1.013  | 1.30E-02 |
| <i>SP140</i>      | 1.625  | 1.02E-02 | <i>SYCP2</i>     | -0.410 | 1.30E-02 |
| <i>GIMAP8</i>     | 1.610  | 1.02E-02 | <i>LINC00338</i> | -0.475 | 1.30E-02 |
| <i>IRX3</i>       | -0.587 | 1.02E-02 | <i>FAM161A</i>   | -0.553 | 1.30E-02 |
| <i>ZBTB7C</i>     | -0.618 | 1.02E-02 | <i>PAFAH1B3</i>  | -0.565 | 1.30E-02 |
| <i>GPHN</i>       | -0.665 | 1.02E-02 | <i>LRMP</i>      | 0.848  | 1.31E-02 |
| <i>SEPT6</i>      | 1.344  | 1.03E-02 | <i>GM2A</i>      | 0.845  | 1.31E-02 |
| <i>TMCC3</i>      | 0.851  | 1.03E-02 | <i>GFPT2</i>     | 0.835  | 1.31E-02 |
| <i>PRR5L</i>      | 0.749  | 1.03E-02 | <i>JAM3</i>      | 0.770  | 1.31E-02 |
| <i>FBXO16</i>     | -0.599 | 1.03E-02 | <i>CXCL14</i>    | 0.548  | 1.31E-02 |
| <i>FAM120AOS</i>  | -0.601 | 1.03E-02 | <i>ELAVL2</i>    | -0.495 | 1.31E-02 |
| <i>SOX12</i>      | -0.748 | 1.03E-02 | <i>GPSM2</i>     | -0.505 | 1.31E-02 |
| <i>ITGAM</i>      | 1.796  | 1.04E-02 | <i>MYL6B</i>     | -0.543 | 1.31E-02 |
| <i>GVINP1</i>     | 1.701  | 1.04E-02 | <i>GIMAP5</i>    | 0.995  | 1.32E-02 |
| <i>RAB27A</i>     | 1.447  | 1.04E-02 | <i>CSF2RB</i>    | 0.905  | 1.32E-02 |
| <i>SYNGAP1</i>    | -0.773 | 1.04E-02 | <i>CD200</i>     | 0.620  | 1.32E-02 |
| <i>CCR1</i>       | 1.834  | 1.05E-02 | <i>EOMES</i>     | 0.580  | 1.32E-02 |
| <i>GAB3</i>       | 1.531  | 1.05E-02 | <i>LANCL2</i>    | -0.458 | 1.32E-02 |
| <i>GZMH</i>       | 1.489  | 1.05E-02 | <i>DHCR7</i>     | -0.483 | 1.32E-02 |



|                    |        |          |                  |        |          |
|--------------------|--------|----------|------------------|--------|----------|
| <i>PRKCH</i>       | 1.184  | 1.05E-02 | <i>LOC728485</i> | -0.537 | 1.32E-02 |
| <i>CSTA</i>        | 1.098  | 1.05E-02 | <i>LY96</i>      | 1.098  | 1.33E-02 |
| <i>RARRES1</i>     | 0.982  | 1.05E-02 | <i>LRRK2</i>     | 0.837  | 1.33E-02 |
| <i>TRAF3</i>       | 0.887  | 1.05E-02 | <i>LOC339524</i> | 0.780  | 1.33E-02 |
| <i>ANKDD1A</i>     | 0.781  | 1.05E-02 | <i>ACSL5</i>     | 0.690  | 1.33E-02 |
| <i>C8orf47</i>     | 0.389  | 1.05E-02 | <i>KDR</i>       | 0.648  | 1.33E-02 |
| <i>FONG</i>        | 0.341  | 1.05E-02 | <i>CPM</i>       | 0.548  | 1.33E-02 |
| <i>SCGB1D1</i>     | -0.589 | 1.05E-02 | <i>HIST1H4F</i>  | -0.383 | 1.33E-02 |
| <i>COBL</i>        | -0.633 | 1.05E-02 | <i>XYLB</i>      | -0.440 | 1.33E-02 |
| <i>C5</i>          | -0.668 | 1.05E-02 | <i>RABL5</i>     | -0.470 | 1.33E-02 |
| <i>DPCD</i>        | -0.709 | 1.05E-02 | <i>GMFG</i>      | 0.985  | 1.34E-02 |
| <i>FAM98C</i>      | -0.766 | 1.05E-02 | <i>PRRX1</i>     | 0.900  | 1.34E-02 |
| <i>ARNTL2</i>      | 1.362  | 1.06E-02 | <i>SUSD1</i>     | 0.687  | 1.34E-02 |
| <i>IFNAR2</i>      | 1.048  | 1.06E-02 | <i>APOL4</i>     | 0.517  | 1.34E-02 |
| <i>TESPA1</i>      | 0.972  | 1.06E-02 | <i>LRRCC1</i>    | -0.513 | 1.34E-02 |
| <i>MUC15</i>       | 0.502  | 1.06E-02 | <i>NOP56</i>     | -0.573 | 1.34E-02 |
| <i>PKHD1L1</i>     | 0.372  | 1.06E-02 | <i>MXRA5</i>     | 0.903  | 1.35E-02 |
| <i>MAGEA4</i>      | 0.315  | 1.06E-02 | <i>PTPN22</i>    | 0.848  | 1.35E-02 |
| <i>EML6</i>        | -0.573 | 1.06E-02 | <i>DARC</i>      | 0.810  | 1.35E-02 |
| <i>SNORD8</i>      | -0.595 | 1.06E-02 | <i>CYP1B1</i>    | 0.703  | 1.35E-02 |
| <i>FAM222A-AS1</i> | -0.621 | 1.06E-02 | <i>CXCL13</i>    | 0.545  | 1.35E-02 |
| <i>SFT2D3</i>      | -0.648 | 1.06E-02 | <i>C10orf12</i>  | -0.435 | 1.35E-02 |
| <i>KAZALD1</i>     | -0.671 | 1.06E-02 | <i>HIST1H4G</i>  | -0.460 | 1.35E-02 |
| <i>MFSD3</i>       | -0.762 | 1.06E-02 | <i>THAP9</i>     | -0.513 | 1.35E-02 |
| <i>ISG20</i>       | 1.639  | 1.07E-02 | <i>HAUS8</i>     | -0.537 | 1.35E-02 |
| <i>CXCR4</i>       | 1.316  | 1.07E-02 | <i>FHL1</i>      | 0.778  | 1.36E-02 |
| <i>LRRC6</i>       | -0.536 | 1.07E-02 | <i>HPGDS</i>     | 0.678  | 1.36E-02 |
| <i>RBM20</i>       | -0.548 | 1.07E-02 | <i>NR1H3</i>     | 0.648  | 1.36E-02 |
| <i>CSPG5</i>       | -0.617 | 1.07E-02 | <i>IGDCC4</i>    | 0.547  | 1.36E-02 |
| <i>GDPD3</i>       | -0.624 | 1.07E-02 | <i>IGLL3P</i>    | 0.525  | 1.36E-02 |
| <i>ULK4</i>        | -0.643 | 1.07E-02 | <i>ABCB1</i>     | 0.495  | 1.36E-02 |
| <i>GPR18</i>       | 1.320  | 1.08E-02 | <i>ZSCAN5A</i>   | -0.423 | 1.36E-02 |
| <i>ERP27</i>       | 0.598  | 1.08E-02 | <i>KIAA2022</i>  | -0.463 | 1.36E-02 |
| <i>PROM1</i>       | 0.502  | 1.08E-02 | <i>KSR2</i>      | -0.467 | 1.36E-02 |
| <i>SETD3</i>       | -0.578 | 1.08E-02 | <i>FP588</i>     | -0.553 | 1.36E-02 |
| <i>LDHC</i>        | -0.582 | 1.08E-02 | <i>SLAMF8</i>    | 0.985  | 1.37E-02 |
| <i>TUBG2</i>       | -0.655 | 1.08E-02 | <i>GPRIN3</i>    | 0.453  | 1.37E-02 |
| <i>KISS1R</i>      | -0.661 | 1.08E-02 | <i>IQCD</i>      | -0.463 | 1.37E-02 |
| <i>ATP9A</i>       | -0.737 | 1.08E-02 | <i>CLVS1</i>     | -0.470 | 1.37E-02 |
| <i>CD1D</i>        | 0.939  | 1.09E-02 | <i>ZNF491</i>    | -0.477 | 1.37E-02 |
| <i>ALPK2</i>       | 0.875  | 1.09E-02 | <i>PYCRL</i>     | -0.555 | 1.37E-02 |
| <i>ST8SIA1</i>     | 0.641  | 1.09E-02 | <i>CCR5</i>      | 0.938  | 1.38E-02 |
| <i>RGMB</i>        | -0.586 | 1.09E-02 | <i>ALOX5</i>     | 0.893  | 1.38E-02 |
| <i>CAPN8</i>       | -0.597 | 1.09E-02 | <i>C1orf100</i>  | -0.467 | 1.38E-02 |
| <i>SLC41A3</i>     | -0.639 | 1.09E-02 | <i>SNRPC</i>     | -0.563 | 1.38E-02 |
| <i>NPAS2</i>       | -0.645 | 1.09E-02 | <i>OXLD1</i>     | -0.563 | 1.38E-02 |
| <i>CACNB2</i>      | -0.679 | 1.09E-02 | <i>HIST1H2BI</i> | -0.405 | 1.39E-02 |
| <i>LYZL4</i>       | -0.741 | 1.09E-02 | <i>GLS2</i>      | -0.465 | 1.39E-02 |
| <i>ZNF397</i>      | -0.748 | 1.09E-02 | <i>FAHD2A</i>    | -0.513 | 1.39E-02 |
| <i>FLJ45983</i>    | -0.769 | 1.09E-02 | <i>CUX2</i>      | 0.293  | 1.40E-02 |
| <i>CD247</i>       | 1.611  | 1.10E-02 | <i>HIST1H3A</i>  | -0.393 | 1.40E-02 |

|                  |        |          |                     |        |          |
|------------------|--------|----------|---------------------|--------|----------|
| <i>CFHR2</i>     | 0.785  | 1.10E-02 | <i>LCN12</i>        | -0.413 | 1.40E-02 |
| <i>TIMD4</i>     | 0.624  | 1.10E-02 | <i>C3orf37</i>      | -0.473 | 1.40E-02 |
| <i>ARHGAP36</i>  | -0.586 | 1.10E-02 | <i>ARHGAP30</i>     | 1.020  | 1.41E-02 |
| <i>DDAH1</i>     | -0.643 | 1.10E-02 | <i>CD68</i>         | 0.935  | 1.41E-02 |
| <i>C11orf52</i>  | -0.714 | 1.10E-02 | <i>SERPINB9</i>     | 0.678  | 1.41E-02 |
| <i>SLC26A11</i>  | -0.733 | 1.10E-02 | <i>KL</i>           | 0.455  | 1.41E-02 |
| <i>C2</i>        | 1.637  | 1.11E-02 | <i>TRAF3IP1</i>     | -0.438 | 1.41E-02 |
| <i>TLR3</i>      | 1.365  | 1.11E-02 | <i>AIF1</i>         | 1.133  | 1.42E-02 |
| <i>STYK1</i>     | 0.588  | 1.11E-02 | <i>CCRL2</i>        | 0.783  | 1.42E-02 |
| <i>ZNF541</i>    | -0.682 | 1.11E-02 | <i>PLXNC1</i>       | 0.780  | 1.42E-02 |
| <i>PSMB8</i>     | 1.924  | 1.12E-02 | <i>PLXDC2</i>       | 0.777  | 1.42E-02 |
| <i>IGSF6</i>     | 1.640  | 1.12E-02 | <i>ABCA9</i>        | 0.670  | 1.42E-02 |
| <i>LBH</i>       | 1.068  | 1.12E-02 | <i>GEMIN8</i>       | -0.450 | 1.42E-02 |
| <i>SLC48A1</i>   | -0.714 | 1.12E-02 | <i>TM4SF18</i>      | 0.583  | 1.43E-02 |
| <i>CUL7</i>      | -0.770 | 1.12E-02 | <i>KLHL34</i>       | -0.423 | 1.43E-02 |
| <i>TMEM71</i>    | 1.015  | 1.13E-02 | <i>HYLS1</i>        | -0.490 | 1.43E-02 |
| <i>PLEKHG1</i>   | 0.850  | 1.13E-02 | <i>FXN</i>          | -0.503 | 1.43E-02 |
| <i>HHEX</i>      | 0.824  | 1.13E-02 | <i>ADNP2</i>        | -0.503 | 1.43E-02 |
| <i>SHROOM2</i>   | -0.633 | 1.13E-02 | <i>CHRNA5</i>       | -0.505 | 1.43E-02 |
| <i>ENPP7</i>     | -0.741 | 1.13E-02 | <i>SEPT6</i>        | 0.763  | 1.44E-02 |
| <i>LHFPL2</i>    | 1.291  | 1.14E-02 | <i>SYK</i>          | 0.730  | 1.44E-02 |
| <i>CD83</i>      | 1.284  | 1.14E-02 | <i>FAM26F</i>       | 0.713  | 1.44E-02 |
| <i>MSL3</i>      | 0.736  | 1.14E-02 | <i>MARVELD2</i>     | -0.453 | 1.44E-02 |
| <i>MFHAS1</i>    | 0.679  | 1.14E-02 | <i>COL5A2</i>       | 0.960  | 1.45E-02 |
| <i>FAM176C</i>   | 0.548  | 1.14E-02 | <i>FNDC1</i>        | 0.653  | 1.45E-02 |
| <i>EPYC</i>      | 0.468  | 1.14E-02 | <i>ELMO1</i>        | 0.608  | 1.45E-02 |
| <i>ACTRT3</i>    | 0.430  | 1.14E-02 | <i>SMC1B</i>        | -0.397 | 1.45E-02 |
| <i>TCTN2</i>     | -0.564 | 1.14E-02 | <i>LOC100271722</i> | -0.467 | 1.45E-02 |
| <i>CPO</i>       | -0.568 | 1.14E-02 | <i>NSUN5P2</i>      | -0.565 | 1.45E-02 |
| <i>CCDC147</i>   | -0.653 | 1.14E-02 | <i>PTGDS</i>        | 0.863  | 1.46E-02 |
| <i>SOGA3</i>     | -0.687 | 1.14E-02 | <i>TOR4A</i>        | 0.678  | 1.46E-02 |
| <i>PRLR</i>      | -0.705 | 1.14E-02 | <i>ART3</i>         | -0.375 | 1.46E-02 |
| <i>COX16</i>     | -0.713 | 1.14E-02 | <i>WDR5</i>         | -0.553 | 1.46E-02 |
| <i>UNC79</i>     | -0.726 | 1.14E-02 | <i>GLIPR1</i>       | 1.018  | 1.47E-02 |
| <i>ARAP2</i>     | 1.571  | 1.15E-02 | <i>OLFML2B</i>      | 0.838  | 1.47E-02 |
| <i>PVRIG</i>     | 1.502  | 1.15E-02 | <i>BTNL9</i>        | 0.313  | 1.47E-02 |
| <i>LAX1</i>      | 1.295  | 1.15E-02 | <i>ST20</i>         | -0.408 | 1.47E-02 |
| <i>TMEM45B</i>   | -0.625 | 1.15E-02 | <i>HIST1H4E</i>     | -0.408 | 1.47E-02 |
| <i>ASTN2</i>     | -0.632 | 1.15E-02 | <i>IGSF3</i>        | -0.443 | 1.47E-02 |
| <i>ANO8</i>      | -0.708 | 1.15E-02 | <i>EPS8L2</i>       | -0.498 | 1.47E-02 |
| <i>BTN3A1</i>    | 1.794  | 1.16E-02 | <i>PYHIN1</i>       | 0.680  | 1.48E-02 |
| <i>APOL6</i>     | 1.749  | 1.16E-02 | <i>MNI</i>          | 0.593  | 1.48E-02 |
| <i>PIK3CD</i>    | 1.625  | 1.16E-02 | <i>MSI2</i>         | -0.400 | 1.48E-02 |
| <i>NFKBIE</i>    | 1.514  | 1.16E-02 | <i>ARNT2</i>        | -0.415 | 1.48E-02 |
| <i>SLAMF1</i>    | 1.429  | 1.16E-02 | <i>IRF6</i>         | -0.443 | 1.48E-02 |
| <i>MAF</i>       | 1.064  | 1.16E-02 | <i>FAM222A-AS1</i>  | -0.447 | 1.48E-02 |
| <i>SPP1</i>      | 0.689  | 1.16E-02 | <i>PPCDC</i>        | -0.473 | 1.48E-02 |
| <i>TLR8</i>      | 1.706  | 1.17E-02 | <i>CCNE2</i>        | -0.543 | 1.48E-02 |
| <i>HLA-DOB</i>   | 1.571  | 1.17E-02 | <i>FBN1</i>         | 1.053  | 1.49E-02 |
| <i>SLC12A8</i>   | 0.486  | 1.17E-02 | <i>TXNIP</i>        | 0.918  | 1.49E-02 |
| <i>LOC283174</i> | -0.655 | 1.17E-02 | <i>VWF</i>          | 0.893  | 1.49E-02 |

|                  |        |          |                 |        |          |
|------------------|--------|----------|-----------------|--------|----------|
| <i>CTNNBIP1</i>  | -0.714 | 1.17E-02 | <i>DNMT3B</i>   | -0.498 | 1.49E-02 |
| <i>NENF</i>      | -0.726 | 1.17E-02 | <i>DNAJC27</i>  | -0.517 | 1.49E-02 |
| <i>TAL2</i>      | -0.744 | 1.17E-02 | <i>FOLR2</i>    | 1.088  | 1.50E-02 |
| <i>SIRPG</i>     | 1.411  | 1.18E-02 | <i>AOAH</i>     | 0.913  | 1.50E-02 |
| <i>PARP8</i>     | 1.248  | 1.18E-02 | <i>PAPLN</i>    | 0.597  | 1.50E-02 |
| <i>TPST2</i>     | 0.974  | 1.18E-02 | <i>NIM1</i>     | -0.430 | 1.50E-02 |
| <i>HSD11B1</i>   | 0.920  | 1.18E-02 | <i>PCYT2</i>    | -0.538 | 1.50E-02 |
| <i>CCDC83</i>    | -0.506 | 1.18E-02 | <i>ECM2</i>     | 0.948  | 1.51E-02 |
| <i>DNMBP</i>     | -0.582 | 1.18E-02 | <i>TREM2</i>    | 0.838  | 1.51E-02 |
| <i>MS4A6A</i>    | 1.908  | 1.19E-02 | <i>CCL4</i>     | 0.828  | 1.51E-02 |
| <i>APOE</i>      | 1.258  | 1.19E-02 | <i>TSPAN7</i>   | 0.673  | 1.51E-02 |
| <i>RASGRP1</i>   | 1.046  | 1.19E-02 | <i>RTN1</i>     | 0.533  | 1.51E-02 |
| <i>MT1H</i>      | 0.576  | 1.19E-02 | <i>MYB</i>      | -0.475 | 1.51E-02 |
| <i>UNC13B</i>    | -0.609 | 1.19E-02 | <i>LYRM2</i>    | -0.480 | 1.51E-02 |
| <i>FLJ25758</i>  | -0.667 | 1.19E-02 | <i>NTHL1</i>    | -0.565 | 1.51E-02 |
| <i>GTDC2</i>     | -0.668 | 1.19E-02 | <i>APOL1</i>    | 0.868  | 1.52E-02 |
| <i>PPM1K</i>     | 1.159  | 1.20E-02 | <i>DPYSL3</i>   | 0.803  | 1.52E-02 |
| <i>PLA1A</i>     | 0.821  | 1.20E-02 | <i>TMEM119</i>  | 0.777  | 1.52E-02 |
| <i>DPY19L2</i>   | -0.595 | 1.20E-02 | <i>P2RY12</i>   | 0.453  | 1.52E-02 |
| <i>DNAH12</i>    | -0.666 | 1.20E-02 | <i>PRRT3</i>    | -0.450 | 1.52E-02 |
| <i>ALAD</i>      | -0.678 | 1.20E-02 | <i>APOA1BP</i>  | -0.560 | 1.52E-02 |
| <i>PROKR2</i>    | -0.686 | 1.20E-02 | <i>RCSD1</i>    | 0.800  | 1.53E-02 |
| <i>DNAL4</i>     | -0.693 | 1.20E-02 | <i>USF1</i>     | -0.377 | 1.53E-02 |
| <i>CHD6</i>      | -0.777 | 1.20E-02 | <i>SPINK13</i>  | -0.380 | 1.53E-02 |
| <i>ADCY7</i>     | 1.538  | 1.21E-02 | <i>CASP4</i>    | 1.000  | 1.54E-02 |
| <i>OAS3</i>      | 1.495  | 1.21E-02 | <i>ARHGAP9</i>  | 0.983  | 1.54E-02 |
| <i>P2RY10</i>    | 1.385  | 1.21E-02 | <i>FERMT3</i>   | 0.923  | 1.54E-02 |
| <i>ACP5</i>      | 1.101  | 1.21E-02 | <i>SAMD3</i>    | 0.630  | 1.54E-02 |
| <i>PTPDC1</i>    | -0.653 | 1.21E-02 | <i>RGS13</i>    | 0.360  | 1.54E-02 |
| <i>MILR1</i>     | 1.045  | 1.22E-02 | <i>AMICA1</i>   | 0.857  | 1.55E-02 |
| <i>BLNK</i>      | 0.888  | 1.22E-02 | <i>PPP1R16B</i> | 0.738  | 1.55E-02 |
| <i>C15orf32</i>  | -0.586 | 1.22E-02 | <i>SLC2A3</i>   | 0.818  | 1.56E-02 |
| <i>ALDH1L1</i>   | -0.608 | 1.22E-02 | <i>ESAM</i>     | 0.677  | 1.56E-02 |
| <i>ALX1</i>      | -0.612 | 1.22E-02 | <i>EMB</i>      | 0.580  | 1.56E-02 |
| <i>ARHGAP35</i>  | -0.698 | 1.22E-02 | <i>RGL1</i>     | 0.923  | 1.57E-02 |
| <i>RFTN1</i>     | 1.436  | 1.23E-02 | <i>IL18BP</i>   | 0.830  | 1.57E-02 |
| <i>NOD2</i>      | 1.148  | 1.23E-02 | <i>ITIH5</i>    | 0.743  | 1.57E-02 |
| <i>ANKRD45</i>   | 0.365  | 1.23E-02 | <i>DYNC111</i>  | -0.455 | 1.57E-02 |
| <i>ZNF287</i>    | -0.649 | 1.23E-02 | <i>RNF133</i>   | -0.463 | 1.57E-02 |
| <i>C14orf132</i> | -0.751 | 1.23E-02 | <i>PPP1R13B</i> | -0.490 | 1.57E-02 |
| <i>FCER1G</i>    | 1.847  | 1.24E-02 | <i>C5orf20</i>  | 0.620  | 1.58E-02 |
| <i>GZMK</i>      | 1.622  | 1.24E-02 | <i>HOXA5</i>    | 0.353  | 1.58E-02 |
| <i>NKG7</i>      | 1.528  | 1.24E-02 | <i>KLHL23</i>   | -0.500 | 1.58E-02 |
| <i>KBTBD8</i>    | 1.211  | 1.24E-02 | <i>EARS2</i>    | -0.520 | 1.58E-02 |
| <i>MZB1</i>      | 1.206  | 1.24E-02 | <i>IL1R1</i>    | 0.850  | 1.59E-02 |
| <i>PODXL</i>     | 0.678  | 1.24E-02 | <i>FAM78A</i>   | 0.807  | 1.59E-02 |
| <i>HES1</i>      | -0.557 | 1.24E-02 | <i>MMRN2</i>    | 0.675  | 1.59E-02 |
| <i>PEX11A</i>    | -0.615 | 1.24E-02 | <i>ANGPTL1</i>  | 0.663  | 1.59E-02 |
| <i>TMCO5A</i>    | -0.697 | 1.24E-02 | <i>IGSF10</i>   | 0.537  | 1.59E-02 |
| <i>ERBB4</i>     | -0.699 | 1.24E-02 | <i>RAB12</i>    | -0.393 | 1.59E-02 |
| <i>KIF3A</i>     | -0.721 | 1.24E-02 | <i>ZSCAN2</i>   | -0.465 | 1.59E-02 |

|                  |        |          |                  |        |          |
|------------------|--------|----------|------------------|--------|----------|
| <i>PARP12</i>    | 1.711  | 1.25E-02 | <i>GLT8D2</i>    | 1.000  | 1.60E-02 |
| <i>LTB</i>       | 1.685  | 1.25E-02 | <i>KLF2</i>      | 0.728  | 1.60E-02 |
| <i>EGR2</i>      | 1.043  | 1.25E-02 | <i>ZNF319</i>    | 0.497  | 1.60E-02 |
| <i>C14orf37</i>  | -0.564 | 1.25E-02 | <i>GPR133</i>    | 0.427  | 1.60E-02 |
| <i>ZNF445</i>    | -0.674 | 1.25E-02 | <i>ZNF620</i>    | -0.370 | 1.60E-02 |
| <i>TTC8</i>      | -0.731 | 1.25E-02 | <i>TACC2</i>     | -0.463 | 1.60E-02 |
| <i>MAGED2</i>    | -0.751 | 1.25E-02 | <i>ZNF709</i>    | -0.500 | 1.60E-02 |
| <i>CD52</i>      | 1.660  | 1.26E-02 | <i>TH1L</i>      | -0.548 | 1.60E-02 |
| <i>IL27RA</i>    | 1.256  | 1.26E-02 | <i>PLEKHO2</i>   | 1.078  | 1.61E-02 |
| <i>IQCE</i>      | -0.645 | 1.26E-02 | <i>THBD</i>      | 0.740  | 1.61E-02 |
| <i>LCK</i>       | 1.637  | 1.27E-02 | <i>VWA5A</i>     | 0.670  | 1.61E-02 |
| <i>NT5C3</i>     | 0.862  | 1.27E-02 | <i>FAM46C</i>    | 0.440  | 1.61E-02 |
| <i>A2ML1</i>     | 0.587  | 1.27E-02 | <i>MAB21L1</i>   | 0.410  | 1.61E-02 |
| <i>RGS13</i>     | 0.498  | 1.27E-02 | <i>GZMA</i>      | 0.760  | 1.62E-02 |
| <i>DYNC1H1</i>   | -0.637 | 1.27E-02 | <i>RRN3P2</i>    | 0.360  | 1.62E-02 |
| <i>ARL8A</i>     | -0.669 | 1.27E-02 | <i>CD163L1</i>   | 0.343  | 1.62E-02 |
| <i>C3AR1</i>     | 1.784  | 1.28E-02 | <i>GLYATL2</i>   | 0.240  | 1.62E-02 |
| <i>CYSLTR1</i>   | 1.202  | 1.28E-02 | <i>BCL11A</i>    | -0.483 | 1.62E-02 |
| <i>IL31RA</i>    | -0.612 | 1.28E-02 | <i>RCBTB2</i>    | 0.913  | 1.63E-02 |
| <i>SPON2</i>     | -0.661 | 1.28E-02 | <i>TACC1</i>     | 0.863  | 1.63E-02 |
| <i>FBXO9</i>     | -0.667 | 1.28E-02 | <i>FOXN3</i>     | 0.805  | 1.63E-02 |
| <i>LEAP2</i>     | -0.684 | 1.28E-02 | <i>MMP13</i>     | 0.435  | 1.63E-02 |
| <i>DTX3</i>      | -0.783 | 1.28E-02 | <i>C10orf113</i> | 0.117  | 1.63E-02 |
| <i>SOD2</i>      | 1.625  | 1.29E-02 | <i>WDR88</i>     | -0.420 | 1.63E-02 |
| <i>CD3G</i>      | 1.443  | 1.29E-02 | <i>C5orf55</i>   | -0.420 | 1.63E-02 |
| <i>CPNE8</i>     | 1.022  | 1.29E-02 | <i>HRASLS</i>    | -0.383 | 1.64E-02 |
| <i>CPNE5</i>     | 0.807  | 1.29E-02 | <i>BTBD17</i>    | -0.497 | 1.64E-02 |
| <i>CHST9-AS1</i> | -0.524 | 1.29E-02 | <i>RCOR2</i>     | -0.540 | 1.64E-02 |
| <i>OSBPL6</i>    | -0.535 | 1.29E-02 | <i>BIN2</i>      | 0.935  | 1.65E-02 |
| <i>RIC8B</i>     | -0.608 | 1.29E-02 | <i>PCDHB8</i>    | -0.348 | 1.66E-02 |
| <i>RGS17</i>     | -0.625 | 1.29E-02 | <i>FXYD4</i>     | -0.417 | 1.66E-02 |
| <i>HLA-A</i>     | 1.840  | 1.30E-02 | <i>ZBTB42</i>    | -0.497 | 1.66E-02 |
| <i>TNFRSF1B</i>  | 1.743  | 1.30E-02 | <i>CD52</i>      | 0.905  | 1.67E-02 |
| <i>MPP1</i>      | 1.041  | 1.30E-02 | <i>NEXN</i>      | 0.833  | 1.67E-02 |
| <i>PIP4K2A</i>   | 0.902  | 1.30E-02 | <i>OLA1</i>      | -0.498 | 1.67E-02 |
| <i>SAYS1</i>     | -0.620 | 1.30E-02 | <i>MLKL</i>      | 0.863  | 1.68E-02 |
| <i>KANK4</i>     | -0.621 | 1.30E-02 | <i>FOXP4</i>     | -0.510 | 1.68E-02 |
| <i>LRTOMT</i>    | -0.644 | 1.30E-02 | <i>MYO1F</i>     | 1.055  | 1.69E-02 |
| <i>ESRRG</i>     | -0.696 | 1.30E-02 | <i>TGFBI</i>     | 0.878  | 1.69E-02 |
| <i>TLR7</i>      | 1.427  | 1.31E-02 | <i>LILRB5</i>    | 0.695  | 1.69E-02 |
| <i>P2RY6</i>     | 1.194  | 1.31E-02 | <i>TNFRSF17</i>  | 0.453  | 1.69E-02 |
| <i>MAL</i>       | 0.734  | 1.31E-02 | <i>CD300A</i>    | 0.965  | 1.70E-02 |
| <i>HIST1H2BB</i> | -0.515 | 1.31E-02 | <i>GNG11</i>     | 0.818  | 1.70E-02 |
| <i>SLITRK6</i>   | -0.547 | 1.31E-02 | <i>HOXA10</i>    | 0.190  | 1.70E-02 |
| <i>FLJ38379</i>  | -0.604 | 1.31E-02 | <i>HOXC13</i>    | -0.418 | 1.70E-02 |
| <i>WDFY3-AS2</i> | -0.672 | 1.31E-02 | <i>CTDSPL</i>    | -0.435 | 1.70E-02 |
| <i>IFITM1</i>    | 1.591  | 1.32E-02 | <i>OR7C1</i>     | -0.515 | 1.70E-02 |
| <i>HERC6</i>     | 1.541  | 1.32E-02 | <i>PSMG3</i>     | -0.557 | 1.70E-02 |
| <i>UBE2E3</i>    | 0.928  | 1.32E-02 | <i>TNFSF13B</i>  | 0.923  | 1.71E-02 |
| <i>RAB33A</i>    | 0.745  | 1.32E-02 | <i>OGN</i>       | 0.708  | 1.71E-02 |
| <i>NAGS</i>      | -0.614 | 1.32E-02 | <i>TESPA1</i>    | 0.547  | 1.71E-02 |

|                  |        |          |                 |        |          |
|------------------|--------|----------|-----------------|--------|----------|
| <i>KIAA0895</i>  | -0.660 | 1.32E-02 | <i>SHROOM2</i>  | -0.430 | 1.71E-02 |
| <i>GGT7</i>      | -0.732 | 1.32E-02 | <i>RPL32P3</i>  | -0.497 | 1.71E-02 |
| <i>DNAH7</i>     | -0.744 | 1.32E-02 | <i>GIMAP2</i>   | 0.977  | 1.72E-02 |
| <i>TMC8</i>      | 1.681  | 1.33E-02 | <i>GUSBP11</i>  | 0.573  | 1.72E-02 |
| <i>ARSE</i>      | -0.578 | 1.33E-02 | <i>CTBP2</i>    | -0.450 | 1.72E-02 |
| <i>MANEAL</i>    | -0.610 | 1.33E-02 | <i>SPPL3</i>    | -0.487 | 1.72E-02 |
| <i>ZNF483</i>    | -0.643 | 1.33E-02 | <i>CSRP2BP</i>  | -0.490 | 1.72E-02 |
| <i>FAM116B</i>   | -0.763 | 1.33E-02 | <i>GVINP1</i>   | 0.855  | 1.73E-02 |
| <i>ANKRD44</i>   | 1.109  | 1.34E-02 | <i>TMEM176B</i> | 0.665  | 1.73E-02 |
| <i>BCAT1</i>     | 0.872  | 1.34E-02 | <i>AADAC</i>    | 0.358  | 1.73E-02 |
| <i>SLFN13</i>    | 0.476  | 1.34E-02 | <i>NKAPP1</i>   | -0.410 | 1.73E-02 |
| <i>LIN28B</i>    | 0.371  | 1.34E-02 | <i>MLLT4</i>    | -0.465 | 1.73E-02 |
| <i>FAM189A1</i>  | -0.659 | 1.34E-02 | <i>RBM14</i>    | -0.533 | 1.73E-02 |
| <i>RAC2</i>      | 1.840  | 1.35E-02 | <i>COL1A2</i>   | 0.970  | 1.74E-02 |
| <i>IL6R</i>      | 0.996  | 1.35E-02 | <i>CEP112</i>   | 0.683  | 1.74E-02 |
| <i>CXCR2</i>     | 0.828  | 1.35E-02 | <i>CD80</i>     | 0.663  | 1.74E-02 |
| <i>FAM179A</i>   | 0.646  | 1.35E-02 | <i>SH3RF3</i>   | 0.573  | 1.74E-02 |
| <i>MTSS1</i>     | -0.573 | 1.35E-02 | <i>ANKDD1A</i>  | 0.490  | 1.74E-02 |
| <i>C19orf18</i>  | -0.628 | 1.35E-02 | <i>C14orf39</i> | -0.353 | 1.74E-02 |
| <i>RALGPS1</i>   | -0.756 | 1.35E-02 | <i>DNAL4</i>    | -0.485 | 1.74E-02 |
| <i>IFIT2</i>     | 1.669  | 1.36E-02 | <i>C11orf45</i> | 0.210  | 1.75E-02 |
| <i>IL7R</i>      | 1.508  | 1.36E-02 | <i>ZNF750</i>   | -0.375 | 1.75E-02 |
| <i>RFX5</i>      | 1.165  | 1.36E-02 | <i>VCX</i>      | -0.400 | 1.75E-02 |
| <i>TMEM156</i>   | 0.768  | 1.36E-02 | <i>DDX49</i>    | -0.563 | 1.75E-02 |
| <i>PIH1D2</i>    | -0.569 | 1.36E-02 | <i>ARHGDI8</i>  | 0.883  | 1.76E-02 |
| <i>C1orf56</i>   | -0.570 | 1.36E-02 | <i>SOX17</i>    | 0.675  | 1.76E-02 |
| <i>SLC22A23</i>  | -0.687 | 1.36E-02 | <i>SLC6A15</i>  | -0.475 | 1.76E-02 |
| <i>IFIH1</i>     | 1.855  | 1.37E-02 | <i>PYROXD2</i>  | -0.490 | 1.76E-02 |
| <i>PLEKHA2</i>   | 0.890  | 1.37E-02 | <i>TIMM13</i>   | -0.543 | 1.76E-02 |
| <i>SCD5</i>      | 0.588  | 1.37E-02 | <i>HTRA1</i>    | 1.038  | 1.77E-02 |
| <i>TDRD5</i>     | -0.594 | 1.37E-02 | <i>TMEM173</i>  | 0.830  | 1.77E-02 |
| <i>SLC1A2</i>    | -0.655 | 1.37E-02 | <i>C11orf96</i> | 0.663  | 1.77E-02 |
| <i>HOOK2</i>     | -0.687 | 1.37E-02 | <i>CCDC23</i>   | -0.440 | 1.77E-02 |
| <i>LOC643923</i> | -0.760 | 1.37E-02 | <i>CHRN3</i>    | -0.525 | 1.77E-02 |
| <i>AMICA1</i>    | 1.503  | 1.38E-02 | <i>SGPP1</i>    | 0.818  | 1.78E-02 |
| <i>TRAF1</i>     | 1.371  | 1.38E-02 | <i>SLFN5</i>    | 0.780  | 1.78E-02 |
| <i>FAM69A</i>    | 1.128  | 1.38E-02 | <i>SLC39A8</i>  | 0.463  | 1.78E-02 |
| <i>GPR114</i>    | 1.086  | 1.38E-02 | <i>ZSWIM5</i>   | -0.460 | 1.78E-02 |
| <i>MYO5B</i>     | -0.620 | 1.38E-02 | <i>SNHG10</i>   | -0.497 | 1.78E-02 |
| <i>SOX13</i>     | -0.682 | 1.38E-02 | <i>SASH3</i>    | 1.043  | 1.79E-02 |
| <i>ZFH4</i>      | -0.684 | 1.38E-02 | <i>TNFAIP8</i>  | 0.845  | 1.79E-02 |
| <i>DDR1</i>      | -0.731 | 1.38E-02 | <i>MGLL</i>     | 0.695  | 1.79E-02 |
| <i>ALOX5AP</i>   | 1.573  | 1.39E-02 | <i>LMCD1</i>    | 0.685  | 1.79E-02 |
| <i>FAM107B</i>   | 0.843  | 1.39E-02 | <i>SOCS2</i>    | 0.380  | 1.79E-02 |
| <i>DAPK1</i>     | 0.809  | 1.39E-02 | <i>KCTD14</i>   | -0.400 | 1.79E-02 |
| <i>LYPD1</i>     | 0.561  | 1.39E-02 | <i>C20orf96</i> | -0.437 | 1.79E-02 |
| <i>C6orf164</i>  | -0.589 | 1.39E-02 | <i>PLK4</i>     | -0.565 | 1.79E-02 |
| <i>VAV3</i>      | -0.594 | 1.39E-02 | <i>NCF4</i>     | 0.985  | 1.80E-02 |
| <i>CASC2</i>     | -0.679 | 1.39E-02 | <i>GBP3</i>     | 0.830  | 1.80E-02 |
| <i>CD74</i>      | 1.769  | 1.40E-02 | <i>SEMA5A</i>   | 0.778  | 1.80E-02 |
| <i>SAMD9</i>     | 1.760  | 1.40E-02 | <i>CLMP</i>     | 0.623  | 1.80E-02 |

|                  |        |          |                  |        |          |
|------------------|--------|----------|------------------|--------|----------|
| <i>P2RY13</i>    | 1.557  | 1.40E-02 | <i>IL18R1</i>    | 0.620  | 1.80E-02 |
| <i>LTF</i>       | 0.638  | 1.40E-02 | <i>MECOM</i>     | 0.420  | 1.80E-02 |
| <i>TMED6</i>     | -0.491 | 1.40E-02 | <i>FUT4</i>      | 0.415  | 1.80E-02 |
| <i>MX1</i>       | 1.593  | 1.41E-02 | <i>DNASE1</i>    | -0.408 | 1.80E-02 |
| <i>FAM65B</i>    | 1.244  | 1.41E-02 | <i>LOC646762</i> | -0.423 | 1.80E-02 |
| <i>AMPD3</i>     | 1.023  | 1.41E-02 | <i>RIC8B</i>     | -0.430 | 1.80E-02 |
| <i>KIAA0125</i>  | 1.003  | 1.41E-02 | <i>RRP8</i>      | -0.483 | 1.80E-02 |
| <i>ACSL6</i>     | 0.406  | 1.41E-02 | <i>EIF2B5</i>    | -0.505 | 1.80E-02 |
| <i>RNF133</i>    | -0.634 | 1.41E-02 | <i>SNX29</i>     | 0.747  | 1.81E-02 |
| <i>POMT1</i>     | -0.711 | 1.41E-02 | <i>KLRF1</i>     | 0.415  | 1.81E-02 |
| <i>ITGAL</i>     | 1.722  | 1.42E-02 | <i>PDC</i>       | -0.420 | 1.81E-02 |
| <i>FAM78A</i>    | 1.386  | 1.42E-02 | <i>OIP5</i>      | -0.568 | 1.81E-02 |
| <i>SLC26A9</i>   | 0.458  | 1.42E-02 | <i>PCOLCE</i>    | 0.950  | 1.82E-02 |
| <i>ZNF490</i>    | -0.596 | 1.42E-02 | <i>EMCN</i>      | 0.815  | 1.82E-02 |
| <i>LRRC17</i>    | -0.654 | 1.42E-02 | <i>RAI2</i>      | 0.620  | 1.82E-02 |
| <i>CARKD</i>     | -0.715 | 1.42E-02 | <i>GJA5</i>      | 0.608  | 1.82E-02 |
| <i>NOL3</i>      | -0.729 | 1.42E-02 | <i>GUCY1B3</i>   | 0.600  | 1.82E-02 |
| <i>BTN3A3</i>    | 1.896  | 1.43E-02 | <i>GJB2</i>      | 0.397  | 1.82E-02 |
| <i>ZNF479</i>    | -0.542 | 1.43E-02 | <i>CD74</i>      | 0.963  | 1.83E-02 |
| <i>C17orf78</i>  | -0.588 | 1.43E-02 | <i>DRAM1</i>     | 0.940  | 1.83E-02 |
| <i>SETD4</i>     | -0.630 | 1.43E-02 | <i>VAV1</i>      | 0.860  | 1.83E-02 |
| <i>MUM1</i>      | -0.705 | 1.43E-02 | <i>FBXO22</i>    | -0.505 | 1.83E-02 |
| <i>SHC2</i>      | -0.756 | 1.43E-02 | <i>TNPO2</i>     | -0.533 | 1.83E-02 |
| <i>FERMT3</i>    | 1.638  | 1.44E-02 | <i>RFTN1</i>     | 0.773  | 1.85E-02 |
| <i>CCR7</i>      | 1.497  | 1.44E-02 | <i>STAT5A</i>    | 0.735  | 1.85E-02 |
| <i>CD24</i>      | 0.590  | 1.44E-02 | <i>SPOCK1</i>    | 0.705  | 1.85E-02 |
| <i>DEFB1</i>     | 0.571  | 1.44E-02 | <i>SNTB2</i>     | 0.673  | 1.85E-02 |
| <i>ACSS3</i>     | -0.569 | 1.44E-02 | <i>TDO2</i>      | 0.428  | 1.85E-02 |
| <i>LOC283588</i> | -0.638 | 1.44E-02 | <i>SCG2</i>      | 0.408  | 1.85E-02 |
| <i>TADA2B</i>    | -0.646 | 1.44E-02 | <i>PCK1</i>      | 0.288  | 1.85E-02 |
| <i>PLEK</i>      | 1.825  | 1.45E-02 | <i>AAR2</i>      | -0.460 | 1.85E-02 |
| <i>EVI2A</i>     | 1.672  | 1.45E-02 | <i>SPATA25</i>   | -0.493 | 1.85E-02 |
| <i>CLEC2B</i>    | 1.406  | 1.45E-02 | <i>MMACHC</i>    | -0.508 | 1.85E-02 |
| <i>APOBEC3C</i>  | 1.114  | 1.45E-02 | <i>SPARC</i>     | 1.010  | 1.86E-02 |
| <i>AKR1B1</i>    | 1.054  | 1.45E-02 | <i>EPB41L2</i>   | 0.680  | 1.86E-02 |
| <i>CDK20</i>     | -0.628 | 1.45E-02 | <i>ADAMDEC1</i>  | 0.575  | 1.86E-02 |
| <i>CES4A</i>     | -0.710 | 1.45E-02 | <i>LHFP</i>      | 0.943  | 1.87E-02 |
| <i>LOC441204</i> | -0.764 | 1.45E-02 | <i>PPAP2A</i>    | 0.815  | 1.87E-02 |
| <i>TEX264</i>    | -0.789 | 1.45E-02 | <i>HS3ST2</i>    | 0.675  | 1.87E-02 |
| <i>LINC00189</i> | -0.462 | 1.46E-02 | <i>PARP15</i>    | 0.580  | 1.87E-02 |
| <i>AGR2</i>      | -0.536 | 1.46E-02 | <i>CDO1</i>      | 0.560  | 1.87E-02 |
| <i>APOOL</i>     | -0.606 | 1.46E-02 | <i>SIX4</i>      | -0.423 | 1.87E-02 |
| <i>MAP2K5</i>    | -0.662 | 1.46E-02 | <i>C18orf56</i>  | -0.510 | 1.87E-02 |
| <i>CDC42SE2</i>  | 1.668  | 1.47E-02 | <i>NOM1</i>      | -0.527 | 1.87E-02 |
| <i>PATL2</i>     | 1.339  | 1.47E-02 | <i>GPRIN1</i>    | -0.560 | 1.87E-02 |
| <i>SLC9A7</i>    | 0.592  | 1.47E-02 | <i>UGT8</i>      | -0.408 | 1.88E-02 |
| <i>PPEF1</i>     | -0.578 | 1.47E-02 | <i>DIP2A</i>     | -0.420 | 1.88E-02 |
| <i>HIST1H4G</i>  | -0.614 | 1.47E-02 | <i>LOC144486</i> | -0.453 | 1.88E-02 |
| <i>DLG2</i>      | -0.649 | 1.47E-02 | <i>FLJ25758</i>  | -0.477 | 1.88E-02 |
| <i>ZBTB45</i>    | -0.702 | 1.47E-02 | <i>INCENP</i>    | -0.510 | 1.88E-02 |
| <i>SYT9</i>      | -0.713 | 1.47E-02 | <i>DANCR</i>     | -0.523 | 1.88E-02 |

|              |        |          |           |        |          |
|--------------|--------|----------|-----------|--------|----------|
| ZNF428       | -0.726 | 1.47E-02 | ANGPTL2   | 1.020  | 1.89E-02 |
| C21orf88     | -0.750 | 1.47E-02 | MS4A7     | 0.847  | 1.89E-02 |
| PRKCQ        | 1.035  | 1.48E-02 | CTTN      | -0.415 | 1.89E-02 |
| ADORA2A      | 0.811  | 1.48E-02 | FAM84A    | -0.420 | 1.89E-02 |
| ABCB1        | 0.605  | 1.48E-02 | WDR67     | -0.538 | 1.89E-02 |
| EEPD1        | -0.569 | 1.48E-02 | SRPX2     | 0.723  | 1.90E-02 |
| PHF20        | -0.609 | 1.48E-02 | NOX4      | 0.463  | 1.90E-02 |
| KCNE2        | -0.671 | 1.48E-02 | PMF1      | -0.515 | 1.90E-02 |
| AMN1         | -0.704 | 1.48E-02 | CDH11     | 0.938  | 1.91E-02 |
| HAVCR2       | 1.633  | 1.49E-02 | FCN1      | 0.878  | 1.91E-02 |
| WNT8A        | -0.531 | 1.49E-02 | LYVE1     | 0.780  | 1.91E-02 |
| WDR27        | -0.724 | 1.49E-02 | CD3D      | 0.735  | 1.91E-02 |
| WIPF1        | 1.761  | 1.50E-02 | FBXO16    | -0.397 | 1.91E-02 |
| KLRB1        | 1.461  | 1.50E-02 | DFFB      | -0.490 | 1.91E-02 |
| LRMP         | 1.327  | 1.50E-02 | SHANK2    | -0.510 | 1.91E-02 |
| BANK1        | 0.933  | 1.50E-02 | SLC41A2   | 0.737  | 1.92E-02 |
| FCRLA        | 0.799  | 1.50E-02 | PARM1     | 0.543  | 1.92E-02 |
| BTBD11       | 0.304  | 1.50E-02 | RBM4      | -0.467 | 1.92E-02 |
| PCDH10       | -0.615 | 1.50E-02 | LOC339352 | -0.517 | 1.92E-02 |
| UBASH3B      | 0.858  | 1.51E-02 | PAQR4     | -0.520 | 1.92E-02 |
| ORM2         | 0.360  | 1.51E-02 | SRPX      | 0.845  | 1.93E-02 |
| ZNF354C      | -0.518 | 1.51E-02 | PHACTR2   | 0.760  | 1.93E-02 |
| CAPS2        | -0.525 | 1.51E-02 | KLRK1     | 0.715  | 1.93E-02 |
| FOXP2        | -0.631 | 1.51E-02 | SHE       | 0.687  | 1.93E-02 |
| SLFN12       | 1.106  | 1.52E-02 | PLBD1     | 0.578  | 1.93E-02 |
| FAM20A       | 0.981  | 1.52E-02 | AXDND1    | -0.387 | 1.93E-02 |
| RAB37        | 0.873  | 1.52E-02 | ALX1      | -0.428 | 1.93E-02 |
| SNTN         | -0.520 | 1.52E-02 | ESCO2     | -0.540 | 1.93E-02 |
| ARMC12       | -0.637 | 1.52E-02 | ECSCR     | 0.737  | 1.94E-02 |
| PLXNB3       | -0.713 | 1.52E-02 | GALNT12   | 0.343  | 1.94E-02 |
| MZT2A        | -0.717 | 1.52E-02 | KLF5      | -0.460 | 1.94E-02 |
| UBASH3A      | 1.235  | 1.53E-02 | FGD2      | 0.957  | 1.95E-02 |
| CCR6         | 0.628  | 1.53E-02 | TLR8      | 0.888  | 1.95E-02 |
| HOPX         | 0.578  | 1.53E-02 | ABHD6     | 0.488  | 1.95E-02 |
| SDK1         | 0.491  | 1.53E-02 | CUZD1     | -0.440 | 1.95E-02 |
| DUSP15       | -0.744 | 1.53E-02 | BCL9      | -0.463 | 1.95E-02 |
| NCKAP1L      | 1.761  | 1.54E-02 | COQ7      | -0.465 | 1.95E-02 |
| CST7         | 1.586  | 1.54E-02 | PALD1     | 0.353  | 1.96E-02 |
| LILRB4       | 1.412  | 1.54E-02 | YBEY      | -0.433 | 1.96E-02 |
| MIAT         | 1.238  | 1.54E-02 | TCF20     | -0.470 | 1.96E-02 |
| PLCG2        | 1.147  | 1.54E-02 | UBXN2B    | -0.478 | 1.96E-02 |
| SYT11        | 1.129  | 1.54E-02 | LOC284023 | -0.480 | 1.96E-02 |
| LOC100130100 | 1.033  | 1.54E-02 | C10orf54  | 1.030  | 1.97E-02 |
| ZSWIM1       | -0.581 | 1.54E-02 | DDX43     | 0.120  | 1.97E-02 |
| PGLYRP2      | -0.602 | 1.54E-02 | TTY10     | -0.400 | 1.97E-02 |
| AUTS2        | -0.624 | 1.54E-02 | GLB1L3    | 0.137  | 1.98E-02 |
| ZNF683       | 1.431  | 1.55E-02 | C7orf26   | -0.505 | 1.98E-02 |
| PAQR8        | 0.764  | 1.55E-02 | PIK3CG    | 0.740  | 1.99E-02 |
| MAGEA12      | 0.345  | 1.55E-02 | RAB20     | 0.605  | 1.99E-02 |
| GRIK2        | -0.635 | 1.55E-02 | PLEKHA2   | 0.568  | 1.99E-02 |
| C16orf48     | -0.719 | 1.55E-02 | ITGAL     | 0.908  | 2.00E-02 |

|                  |        |          |                  |        |          |
|------------------|--------|----------|------------------|--------|----------|
| <i>LYN</i>       | 1.587  | 1.56E-02 | <i>CCL19</i>     | 0.665  | 2.00E-02 |
| <i>APIS2</i>     | 1.202  | 1.56E-02 | <i>NLRC5</i>     | 0.833  | 2.01E-02 |
| <i>TSPAN33</i>   | 0.726  | 1.56E-02 | <i>SELP</i>      | 0.820  | 2.01E-02 |
| <i>IQCG</i>      | 0.599  | 1.56E-02 | <i>IGFBP3</i>    | 0.625  | 2.01E-02 |
| <i>CRISP3</i>    | -0.458 | 1.56E-02 | <i>SALL1</i>     | 0.213  | 2.01E-02 |
| <i>CNIH3</i>     | -0.502 | 1.56E-02 | <i>TCAM1P</i>    | -0.360 | 2.01E-02 |
| <i>CKMT2</i>     | -0.559 | 1.56E-02 | <i>ENDOV</i>     | -0.473 | 2.01E-02 |
| <i>HILPDA</i>    | -0.562 | 1.56E-02 | <i>MUCL1</i>     | 0.287  | 2.02E-02 |
| <i>UNC80</i>     | -0.638 | 1.56E-02 | <i>ZNF233</i>    | -0.397 | 2.02E-02 |
| <i>ENDOV</i>     | -0.660 | 1.56E-02 | <i>RAB11FIP4</i> | -0.483 | 2.02E-02 |
| <i>ARHGAP30</i>  | 1.740  | 1.57E-02 | <i>GNG4</i>      | -0.495 | 2.02E-02 |
| <i>ETS1</i>      | 1.410  | 1.57E-02 | <i>CTSS</i>      | 1.055  | 2.03E-02 |
| <i>EPB41L3</i>   | 0.962  | 1.57E-02 | <i>TMEM140</i>   | 0.955  | 2.03E-02 |
| <i>CCL7</i>      | 0.931  | 1.57E-02 | <i>FUCA1</i>     | 0.905  | 2.03E-02 |
| <i>LOC148709</i> | -0.540 | 1.57E-02 | <i>CARD16</i>    | 0.857  | 2.03E-02 |
| <i>NPY1R</i>     | -0.549 | 1.57E-02 | <i>SEMA3G</i>    | 0.658  | 2.03E-02 |
| <i>REPS2</i>     | -0.595 | 1.57E-02 | <i>RASGRP3</i>   | 0.628  | 2.03E-02 |
| <i>TBC1D16</i>   | -0.623 | 1.57E-02 | <i>BST1</i>      | 0.625  | 2.03E-02 |
| <i>ZNF827</i>    | -0.641 | 1.57E-02 | <i>ZNF174</i>    | -0.433 | 2.03E-02 |
| <i>CYTH2</i>     | -0.668 | 1.57E-02 | <i>ABCA8</i>     | 0.745  | 2.04E-02 |
| <i>AKAP1</i>     | -0.716 | 1.57E-02 | <i>LRRN4CL</i>   | 0.740  | 2.04E-02 |
| <i>GPR84</i>     | 1.288  | 1.58E-02 | <i>ICOS</i>      | 0.615  | 2.04E-02 |
| <i>GAPT</i>      | 0.996  | 1.58E-02 | <i>TIGIT</i>     | 0.530  | 2.04E-02 |
| <i>ANXA2R</i>    | 0.699  | 1.58E-02 | <i>C10orf11</i>  | 0.530  | 2.04E-02 |
| <i>TNFSF15</i>   | 0.560  | 1.58E-02 | <i>ZBED2</i>     | 0.348  | 2.04E-02 |
| <i>DNAJA4</i>    | -0.503 | 1.58E-02 | <i>LAMA1</i>     | 0.237  | 2.04E-02 |
| <i>CLSTN2</i>    | -0.627 | 1.58E-02 | <i>CD300LF</i>   | 0.847  | 2.05E-02 |
| <i>PRKCZ</i>     | -0.646 | 1.58E-02 | <i>CMPK2</i>     | 0.623  | 2.05E-02 |
| <i>KIAA1522</i>  | -0.697 | 1.58E-02 | <i>BCL11B</i>    | 0.453  | 2.05E-02 |
| <i>OAS1</i>      | 1.560  | 1.59E-02 | <i>PTCD1</i>     | -0.475 | 2.05E-02 |
| <i>NEK6</i>      | 0.932  | 1.59E-02 | <i>MIR600HG</i>  | -0.508 | 2.05E-02 |
| <i>SLC34A2</i>   | 0.603  | 1.59E-02 | <i>SELL</i>      | 0.775  | 2.06E-02 |
| <i>FLJ40852</i>  | -0.583 | 1.59E-02 | <i>GAPT</i>      | 0.610  | 2.06E-02 |
| <i>ST7L</i>      | -0.584 | 1.59E-02 | <i>ERMN</i>      | 0.283  | 2.06E-02 |
| <i>NDNF</i>      | -0.602 | 1.59E-02 | <i>KIAA1328</i>  | -0.387 | 2.06E-02 |
| <i>TMEM120B</i>  | -0.646 | 1.59E-02 | <i>TULP3</i>     | -0.430 | 2.06E-02 |
| <i>S100A8</i>    | 1.095  | 1.60E-02 | <i>FYB</i>       | 0.945  | 2.07E-02 |
| <i>CXorf38</i>   | 0.963  | 1.60E-02 | <i>TGM2</i>      | 0.793  | 2.07E-02 |
| <i>SCG3</i>      | -0.513 | 1.60E-02 | <i>MDFIC</i>     | 0.710  | 2.07E-02 |
| <i>EFCAB6</i>    | -0.636 | 1.60E-02 | <i>GBP5</i>      | 0.790  | 2.08E-02 |
| <i>HLA-C</i>     | 1.893  | 1.61E-02 | <i>MAN1A1</i>    | 0.738  | 2.08E-02 |
| <i>APBB1IP</i>   | 1.419  | 1.61E-02 | <i>CD84</i>      | 0.933  | 2.09E-02 |
| <i>CD40</i>      | 1.304  | 1.61E-02 | <i>JAM2</i>      | 0.858  | 2.09E-02 |
| <i>CMTM7</i>     | 0.864  | 1.61E-02 | <i>TLR2</i>      | 0.813  | 2.09E-02 |
| <i>CD200</i>     | 0.800  | 1.61E-02 | <i>RHOU</i>      | 0.387  | 2.09E-02 |
| <i>ANKRD30A</i>  | -0.559 | 1.61E-02 | <i>FAM120C</i>   | -0.383 | 2.09E-02 |
| <i>TRIM21</i>    | 1.513  | 1.62E-02 | <i>DTYMK</i>     | -0.565 | 2.09E-02 |
| <i>C11orf71</i>  | 0.740  | 1.62E-02 | <i>MEF2C</i>     | 0.778  | 2.10E-02 |
| <i>IQCD</i>      | -0.607 | 1.62E-02 | <i>FGF7</i>      | 0.590  | 2.10E-02 |
| <i>HSD11B2</i>   | -0.614 | 1.62E-02 | <i>FKBP11</i>    | 0.533  | 2.10E-02 |
| <i>N6AMT1</i>    | -0.618 | 1.62E-02 | <i>ACVR1C</i>    | 0.353  | 2.10E-02 |



|                  |        |          |                  |        |          |
|------------------|--------|----------|------------------|--------|----------|
| <i>LOC339352</i> | -0.718 | 1.62E-02 | <i>SDK1</i>      | 0.333  | 2.10E-02 |
| <i>SASH3</i>     | 1.858  | 1.63E-02 | <i>ITK</i>       | 0.733  | 2.11E-02 |
| <i>GABRP</i>     | 0.766  | 1.63E-02 | <i>ZNF300P1</i>  | 0.327  | 2.11E-02 |
| <i>ARMC3</i>     | -0.613 | 1.63E-02 | <i>EPYC</i>      | 0.273  | 2.11E-02 |
| <i>ABCG5</i>     | -0.637 | 1.63E-02 | <i>IPO4</i>      | -0.553 | 2.11E-02 |
| <i>MANSC1</i>    | -0.666 | 1.63E-02 | <i>LCP1</i>      | 0.858  | 2.12E-02 |
| <i>HCST</i>      | 1.611  | 1.64E-02 | <i>EGFLAM</i>    | 0.490  | 2.12E-02 |
| <i>SLFN5</i>     | 1.313  | 1.64E-02 | <i>ANO4</i>      | -0.383 | 2.12E-02 |
| <i>ICAM2</i>     | 1.176  | 1.64E-02 | <i>BTBD9</i>     | -0.467 | 2.12E-02 |
| <i>OSBPL3</i>    | 0.949  | 1.64E-02 | <i>HBZ</i>       | -0.390 | 2.13E-02 |
| <i>PAPLN</i>     | 0.797  | 1.64E-02 | <i>RASSF4</i>    | 0.728  | 2.14E-02 |
| <i>LINC00310</i> | -0.492 | 1.64E-02 | <i>MIAT</i>      | 0.710  | 2.14E-02 |
| <i>ZNF620</i>    | -0.496 | 1.64E-02 | <i>SPRY1</i>     | 0.595  | 2.14E-02 |
| <i>NEFM</i>      | -0.531 | 1.64E-02 | <i>C9orf84</i>   | 0.317  | 2.14E-02 |
| <i>HOOK1</i>     | -0.658 | 1.64E-02 | <i>MICAL3</i>    | -0.435 | 2.14E-02 |
| <i>ELP2</i>      | -0.690 | 1.64E-02 | <i>DNAH11</i>    | -0.443 | 2.14E-02 |
| <i>GMFG</i>      | 1.641  | 1.65E-02 | <i>ZNF124</i>    | -0.458 | 2.14E-02 |
| <i>C17orf97</i>  | -0.525 | 1.65E-02 | <i>CBY1</i>      | -0.470 | 2.14E-02 |
| <i>NAT8</i>      | -0.582 | 1.65E-02 | <i>DDR1</i>      | -0.500 | 2.14E-02 |
| <i>NME3</i>      | -0.769 | 1.65E-02 | <i>TAF5</i>      | -0.538 | 2.14E-02 |
| <i>FAM49A</i>    | 1.059  | 1.66E-02 | <i>GAB3</i>      | 0.743  | 2.15E-02 |
| <i>FMO1</i>      | 1.035  | 1.66E-02 | <i>PAX6</i>      | -0.365 | 2.15E-02 |
| <i>SYTL3</i>     | 0.721  | 1.66E-02 | <i>ZFP64</i>     | -0.395 | 2.15E-02 |
| <i>HLA-DQA1</i>  | 0.639  | 1.66E-02 | <i>EFNA4</i>     | -0.458 | 2.15E-02 |
| <i>SLC47A1</i>   | 0.354  | 1.66E-02 | <i>PPP1R9A</i>   | -0.473 | 2.15E-02 |
| <i>NLRP2</i>     | 0.261  | 1.66E-02 | <i>SH2D6</i>     | -0.473 | 2.15E-02 |
| <i>MAEL</i>      | 0.248  | 1.66E-02 | <i>CCL5</i>      | 0.845  | 2.16E-02 |
| <i>GDF11</i>     | -0.587 | 1.66E-02 | <i>NABP1</i>     | 0.813  | 2.16E-02 |
| <i>ZNF552</i>    | -0.587 | 1.66E-02 | <i>POU2AF1</i>   | 0.500  | 2.16E-02 |
| <i>TSHZ1</i>     | -0.699 | 1.66E-02 | <i>CCDC149</i>   | -0.443 | 2.16E-02 |
| <i>OSBPL5</i>    | -0.704 | 1.66E-02 | <i>LOC728537</i> | -0.467 | 2.17E-02 |
| <i>POLRMT</i>    | -0.770 | 1.66E-02 | <i>CD96</i>      | 0.705  | 2.19E-02 |
| <i>HVCN1</i>     | 1.272  | 1.67E-02 | <i>FAM20A</i>    | 0.597  | 2.19E-02 |
| <i>RASGEF1B</i>  | 0.627  | 1.67E-02 | <i>HAO1</i>      | -0.478 | 2.19E-02 |
| <i>CCL26</i>     | 0.518  | 1.67E-02 | <i>PLVAP</i>     | 0.718  | 2.20E-02 |
| <i>IGF2BP2</i>   | 0.511  | 1.67E-02 | <i>GCET2</i>     | 0.423  | 2.20E-02 |
| <i>CA5A</i>      | -0.577 | 1.67E-02 | <i>VSIG10</i>    | -0.395 | 2.20E-02 |
| <i>PRKCB</i>     | 1.365  | 1.68E-02 | <i>MEIG1</i>     | -0.403 | 2.20E-02 |
| <i>LPIN2</i>     | 0.947  | 1.68E-02 | <i>NMU</i>       | -0.420 | 2.20E-02 |
| <i>KCNE3</i>     | 0.544  | 1.68E-02 | <i>DSN1</i>      | -0.515 | 2.20E-02 |
| <i>C20orf202</i> | -0.700 | 1.68E-02 | <i>AKR1C3</i>    | 0.485  | 2.21E-02 |
| <i>SP100</i>     | 1.634  | 1.69E-02 | <i>HBA2</i>      | 0.295  | 2.21E-02 |
| <i>IFIT1</i>     | 1.436  | 1.69E-02 | <i>PCDHA5</i>    | -0.405 | 2.21E-02 |
| <i>CTSL1</i>     | 1.405  | 1.69E-02 | <i>DBIL5P</i>    | -0.407 | 2.21E-02 |
| <i>CD72</i>      | 1.083  | 1.69E-02 | <i>TAF6</i>      | -0.483 | 2.21E-02 |
| <i>TOR4A</i>     | 0.961  | 1.69E-02 | <i>TSEN34</i>    | -0.485 | 2.21E-02 |
| <i>SUSD1</i>     | 0.953  | 1.69E-02 | <i>FGR</i>       | 0.953  | 2.22E-02 |
| <i>IRAK2</i>     | 0.870  | 1.69E-02 | <i>RAC2</i>      | 0.943  | 2.22E-02 |
| <i>LEF1</i>      | 0.584  | 1.69E-02 | <i>STEAP4</i>    | 0.518  | 2.22E-02 |
| <i>MGC39372</i>  | 0.451  | 1.69E-02 | <i>FUT11</i>     | 0.457  | 2.22E-02 |
| <i>EGF</i>       | -0.478 | 1.69E-02 | <i>ERP27</i>     | 0.333  | 2.22E-02 |

|                  |        |          |                     |        |          |
|------------------|--------|----------|---------------------|--------|----------|
| <i>MOK</i>       | -0.496 | 1.69E-02 | <i>ZFAT</i>         | -0.367 | 2.22E-02 |
| <i>IQUB</i>      | -0.582 | 1.69E-02 | <i>SIRT5</i>        | -0.483 | 2.22E-02 |
| <i>TBC1D19</i>   | -0.690 | 1.69E-02 | <i>HJURP</i>        | -0.553 | 2.22E-02 |
| <i>MGMT</i>      | -0.696 | 1.69E-02 | <i>ZFPM2</i>        | 0.643  | 2.23E-02 |
| <i>GPR183</i>    | 1.317  | 1.70E-02 | <i>ARRDC4</i>       | 0.607  | 2.23E-02 |
| <i>PIK3CG</i>    | 1.258  | 1.70E-02 | <i>SCG5</i>         | 0.333  | 2.23E-02 |
| <i>SLC2A6</i>    | 1.199  | 1.70E-02 | <i>SOX13</i>        | -0.470 | 2.23E-02 |
| <i>VAX2</i>      | -0.651 | 1.70E-02 | <i>PTRHD1</i>       | -0.490 | 2.23E-02 |
| <i>BCORL1</i>    | -0.703 | 1.70E-02 | <i>LMBR1</i>        | -0.510 | 2.23E-02 |
| <i>BST2</i>      | 1.296  | 1.71E-02 | <i>THBS2</i>        | 0.803  | 2.24E-02 |
| <i>TM6SF1</i>    | 1.227  | 1.71E-02 | <i>NCEH1</i>        | 0.783  | 2.24E-02 |
| <i>CD28</i>      | 1.125  | 1.71E-02 | <i>TMEM220</i>      | 0.303  | 2.24E-02 |
| <i>FAM43A</i>    | 0.588  | 1.71E-02 | <i>OGDHL</i>        | -0.430 | 2.24E-02 |
| <i>HS3ST3A1</i>  | 0.572  | 1.71E-02 | <i>MMP2</i>         | 0.960  | 2.25E-02 |
| <i>P2RY12</i>    | 0.543  | 1.71E-02 | <i>JAZF1</i>        | 0.740  | 2.25E-02 |
| <i>RAP1GAP2</i>  | -0.520 | 1.71E-02 | <i>CD69</i>         | 0.723  | 2.25E-02 |
| <i>NIPAL3</i>    | -0.616 | 1.71E-02 | <i>BRF2</i>         | -0.428 | 2.25E-02 |
| <i>SLC29A1</i>   | -0.649 | 1.71E-02 | <i>SLC35D3</i>      | 0.103  | 2.26E-02 |
| <i>ISG15</i>     | 1.435  | 1.72E-02 | <i>LOC100288911</i> | -0.467 | 2.26E-02 |
| <i>GPR34</i>     | 1.129  | 1.72E-02 | <i>FAM111B</i>      | -0.480 | 2.26E-02 |
| <i>EFHB</i>      | -0.500 | 1.72E-02 | <i>C1orf53</i>      | -0.495 | 2.26E-02 |
| <i>BRF2</i>      | -0.601 | 1.72E-02 | <i>LOC284440</i>    | -0.500 | 2.26E-02 |
| <i>BSCL2</i>     | -0.713 | 1.72E-02 | <i>PTCD3</i>        | -0.538 | 2.26E-02 |
| <i>BTK</i>       | 1.515  | 1.73E-02 | <i>SAMD9L</i>       | 0.970  | 2.27E-02 |
| <i>C1orf54</i>   | 1.202  | 1.73E-02 | <i>GPR171</i>       | 0.650  | 2.27E-02 |
| <i>UCHL1</i>     | 0.601  | 1.73E-02 | <i>ADTRP</i>        | 0.305  | 2.27E-02 |
| <i>MICALCL</i>   | -0.585 | 1.73E-02 | <i>STAP2</i>        | -0.440 | 2.27E-02 |
| <i>KLHDC9</i>    | -0.717 | 1.73E-02 | <i>NAPB</i>         | -0.463 | 2.27E-02 |
| <i>PARP9</i>     | 1.835  | 1.74E-02 | <i>MARCKS</i>       | 0.720  | 2.28E-02 |
| <i>SH2D2A</i>    | 1.253  | 1.74E-02 | <i>TRAM2</i>        | 0.685  | 2.28E-02 |
| <i>SGK1</i>      | 1.096  | 1.74E-02 | <i>FAM65B</i>       | 0.653  | 2.28E-02 |
| <i>MAX</i>       | 0.847  | 1.74E-02 | <i>CHST11</i>       | 0.583  | 2.28E-02 |
| <i>ADRBK2</i>    | 0.652  | 1.74E-02 | <i>DAPK1</i>        | 0.500  | 2.28E-02 |
| <i>LINC00515</i> | -0.521 | 1.75E-02 | <i>SLC19A3</i>      | 0.488  | 2.28E-02 |
| <i>HOXC6</i>     | -0.532 | 1.75E-02 | <i>IL12B</i>        | 0.325  | 2.28E-02 |
| <i>ZSCAN20</i>   | -0.567 | 1.75E-02 | <i>ICAIL</i>        | -0.417 | 2.28E-02 |
| <i>KIAA2022</i>  | -0.601 | 1.75E-02 | <i>ZNF695</i>       | -0.423 | 2.28E-02 |
| <i>GLRB</i>      | -0.658 | 1.75E-02 | <i>CDPF1</i>        | -0.447 | 2.28E-02 |
| <i>TMEM176A</i>  | 1.109  | 1.76E-02 | <i>CD48</i>         | 0.843  | 2.29E-02 |
| <i>ITM2A</i>     | 0.939  | 1.76E-02 | <i>AOX1</i>         | 0.645  | 2.29E-02 |
| <i>MAP3K14</i>   | 0.888  | 1.76E-02 | <i>TFPI2</i>        | 0.430  | 2.29E-02 |
| <i>MARC2</i>     | -0.567 | 1.76E-02 | <i>SPATS2</i>       | -0.418 | 2.29E-02 |
| <i>RBP2</i>      | -0.618 | 1.76E-02 | <i>CC2D2A</i>       | -0.440 | 2.29E-02 |
| <i>NFS1</i>      | -0.650 | 1.76E-02 | <i>BHLHB9</i>       | -0.445 | 2.29E-02 |
| <i>TMEM106C</i>  | -0.677 | 1.76E-02 | <i>PLEK</i>         | 0.943  | 2.30E-02 |
| <i>TNRC18</i>    | -0.731 | 1.76E-02 | <i>MIR155HG</i>     | 0.530  | 2.30E-02 |
| <i>KLRD1</i>     | 1.461  | 1.77E-02 | <i>ARHGEF9</i>      | -0.448 | 2.30E-02 |
| <i>IL18RAP</i>   | 1.431  | 1.77E-02 | <i>ZNF282</i>       | -0.525 | 2.30E-02 |
| <i>MARCH1</i>    | 1.333  | 1.77E-02 | <i>UFSP1</i>        | -0.550 | 2.30E-02 |
| <i>LRRC8C</i>    | 1.315  | 1.77E-02 | <i>SLC6A6</i>       | 0.590  | 2.31E-02 |
| <i>ENPP2</i>     | 1.031  | 1.77E-02 | <i>C1orf114</i>     | -0.388 | 2.31E-02 |

|                     |        |          |                 |        |          |
|---------------------|--------|----------|-----------------|--------|----------|
| <i>MMP3</i>         | 0.513  | 1.77E-02 | <i>ELK4</i>     | -0.480 | 2.31E-02 |
| <i>PIGL</i>         | -0.563 | 1.77E-02 | <i>FAM195B</i>  | -0.493 | 2.31E-02 |
| <i>DIO1</i>         | -0.564 | 1.77E-02 | <i>RAE1</i>     | -0.520 | 2.31E-02 |
| <i>SLC7A8</i>       | -0.609 | 1.77E-02 | <i>NUP133</i>   | -0.560 | 2.31E-02 |
| <i>FCRL5</i>        | 0.879  | 1.78E-02 | <i>DKK2</i>     | 0.393  | 2.32E-02 |
| <i>KIAA1257</i>     | -0.550 | 1.78E-02 | <i>ORAOV1</i>   | -0.420 | 2.32E-02 |
| <i>GCOM1</i>        | -0.552 | 1.78E-02 | <i>CPSF7</i>    | -0.493 | 2.33E-02 |
| <i>CTNND2</i>       | -0.589 | 1.78E-02 | <i>ADA</i>      | 0.480  | 2.34E-02 |
| <i>DET1</i>         | -0.663 | 1.78E-02 | <i>AQPEP</i>    | 0.367  | 2.34E-02 |
| <i>THEMIS2</i>      | 1.572  | 1.79E-02 | <i>IDO2</i>     | 0.277  | 2.34E-02 |
| <i>VAV1</i>         | 1.484  | 1.79E-02 | <i>PHKA2</i>    | -0.490 | 2.34E-02 |
| <i>CD27</i>         | 1.383  | 1.79E-02 | <i>MFAP4</i>    | 0.848  | 2.35E-02 |
| <i>AKNA</i>         | 1.326  | 1.79E-02 | <i>ADH1B</i>    | 0.700  | 2.35E-02 |
| <i>PTGS1</i>        | 0.875  | 1.79E-02 | <i>MYCT1</i>    | 0.660  | 2.35E-02 |
| <i>BASP1</i>        | 0.808  | 1.79E-02 | <i>MCOLN2</i>   | 0.373  | 2.35E-02 |
| <i>TPRG1</i>        | -0.470 | 1.79E-02 | <i>RGNEF</i>    | -0.415 | 2.35E-02 |
| <i>FAM120B</i>      | -0.603 | 1.79E-02 | <i>CLEC4F</i>   | -0.450 | 2.35E-02 |
| <i>FAM124A</i>      | -0.653 | 1.79E-02 | <i>TLL2</i>     | -0.463 | 2.35E-02 |
| <i>LAMA5</i>        | -0.679 | 1.79E-02 | <i>PATZ1</i>    | -0.513 | 2.35E-02 |
| <i>NCF4</i>         | 1.716  | 1.80E-02 | <i>DGKE</i>     | -0.400 | 2.36E-02 |
| <i>IL2RG</i>        | 1.610  | 1.80E-02 | <i>CDCA7L</i>   | -0.483 | 2.36E-02 |
| <i>PTPN7</i>        | 1.344  | 1.80E-02 | <i>CILP</i>     | 0.838  | 2.37E-02 |
| <i>PPP1R16B</i>     | 1.095  | 1.80E-02 | <i>IL21R</i>    | 0.680  | 2.37E-02 |
| <i>CCDC69</i>       | 0.992  | 1.80E-02 | <i>PDCL2</i>    | -0.320 | 2.37E-02 |
| <i>EPDR1</i>        | 0.681  | 1.80E-02 | <i>PIK3R2</i>   | -0.533 | 2.37E-02 |
| <i>NINJ2</i>        | 0.587  | 1.80E-02 | <i>HVCN1</i>    | 0.693  | 2.38E-02 |
| <i>LOC100287628</i> | 0.531  | 1.80E-02 | <i>PROCR</i>    | 0.475  | 2.38E-02 |
| <i>PCDH11X</i>      | -0.541 | 1.80E-02 | <i>FCERIA</i>   | 0.375  | 2.38E-02 |
| <i>LPA</i>          | -0.577 | 1.80E-02 | <i>RAB3C</i>    | 0.163  | 2.38E-02 |
| <i>TRAM1L1</i>      | -0.617 | 1.80E-02 | <i>AP4M1</i>    | -0.455 | 2.38E-02 |
| <i>SPATA4</i>       | -0.666 | 1.80E-02 | <i>NCOA5</i>    | -0.490 | 2.38E-02 |
| <i>DRAM1</i>        | 1.654  | 1.81E-02 | <i>PILRA</i>    | 0.790  | 2.39E-02 |
| <i>BIN2</i>         | 1.582  | 1.81E-02 | <i>CTSH</i>     | 0.695  | 2.39E-02 |
| <i>TNFAIP8L2</i>    | 1.549  | 1.81E-02 | <i>COMMD7</i>   | -0.420 | 2.39E-02 |
| <i>LAT</i>          | 1.362  | 1.81E-02 | <i>CENPL</i>    | -0.533 | 2.39E-02 |
| <i>TRAF3IP3</i>     | 1.296  | 1.81E-02 | <i>METTL10</i>  | -0.537 | 2.39E-02 |
| <i>CAMK2D</i>       | 1.185  | 1.81E-02 | <i>LILRB4</i>   | 0.750  | 2.40E-02 |
| <i>ASS1</i>         | 0.577  | 1.81E-02 | <i>PNOC</i>     | 0.500  | 2.40E-02 |
| <i>ELMOD1</i>       | -0.499 | 1.81E-02 | <i>GPR63</i>    | -0.423 | 2.40E-02 |
| <i>CGREF1</i>       | -0.572 | 1.82E-02 | <i>SLC22A16</i> | -0.430 | 2.40E-02 |
| <i>DLG5</i>         | -0.623 | 1.82E-02 | <i>RABIF</i>    | -0.455 | 2.40E-02 |
| <i>RBKS</i>         | -0.640 | 1.82E-02 | <i>NT5C1B</i>   | -0.467 | 2.40E-02 |
| <i>NAA60</i>        | -0.700 | 1.82E-02 | <i>CDK2</i>     | -0.493 | 2.40E-02 |
| <i>SPATA7</i>       | -0.726 | 1.82E-02 | <i>C3orf75</i>  | -0.523 | 2.40E-02 |
| <i>TLE4</i>         | 0.977  | 1.83E-02 | <i>WNT2</i>     | 0.808  | 2.41E-02 |
| <i>PLEKHF1</i>      | 0.933  | 1.83E-02 | <i>TAF5L</i>    | -0.438 | 2.41E-02 |
| <i>C19orf12</i>     | 0.576  | 1.83E-02 | <i>BNC2</i>     | 0.813  | 2.42E-02 |
| <i>HOXA1</i>        | 0.303  | 1.83E-02 | <i>FAM26E</i>   | 0.647  | 2.42E-02 |
| <i>SH2B3</i>        | 1.437  | 1.84E-02 | <i>VASH1</i>    | 0.633  | 2.42E-02 |
| <i>CARD6</i>        | 1.437  | 1.84E-02 | <i>SLC36A1</i>  | 0.445  | 2.42E-02 |
| <i>MSANTD3</i>      | 0.919  | 1.84E-02 | <i>SEC61A2</i>  | -0.418 | 2.42E-02 |

|                |        |          |                  |        |          |
|----------------|--------|----------|------------------|--------|----------|
| <i>PLIN2</i>   | 0.670  | 1.84E-02 | <i>LSM14B</i>    | -0.420 | 2.42E-02 |
| <i>RPS23</i>   | -0.635 | 1.84E-02 | <i>CLCN2</i>     | -0.453 | 2.42E-02 |
| <i>MANBAL</i>  | -0.701 | 1.84E-02 | <i>ISYNA1</i>    | -0.475 | 2.42E-02 |
| <i>TCEB2</i>   | -0.718 | 1.84E-02 | <i>PLXDC1</i>    | 0.733  | 2.43E-02 |
| <i>HAGH</i>    | -0.738 | 1.84E-02 | <i>PRSS23</i>    | 0.720  | 2.43E-02 |
| <i>HLA-E</i>   | 1.990  | 1.85E-02 | <i>PLEKHA8</i>   | -0.350 | 2.43E-02 |
| <i>GALNT12</i> | 0.456  | 1.85E-02 | <i>MORN3</i>     | -0.403 | 2.43E-02 |
| <i>CCDC40</i>  | -0.715 | 1.85E-02 | <i>CCR2</i>      | 0.830  | 2.44E-02 |
| <i>HS3ST1</i>  | 0.360  | 1.86E-02 | <i>CHN1</i>      | 0.538  | 2.44E-02 |
| <i>MTMR7</i>   | -0.507 | 1.86E-02 | <i>THBS4</i>     | 0.423  | 2.44E-02 |
| <i>CES3</i>    | -0.634 | 1.86E-02 | <i>KCNE3</i>     | 0.350  | 2.44E-02 |
| <i>EIF2D</i>   | -0.702 | 1.86E-02 | <i>THSD7B</i>    | 0.223  | 2.44E-02 |
| <i>ADPGK</i>   | 1.073  | 1.87E-02 | <i>TPRG1</i>     | 0.163  | 2.44E-02 |
| <i>MSX2</i>    | -0.456 | 1.87E-02 | <i>RPP14</i>     | -0.448 | 2.44E-02 |
| <i>RNF43</i>   | -0.588 | 1.87E-02 | <i>MYO5A</i>     | 0.788  | 2.45E-02 |
| <i>CHIA</i>    | -0.697 | 1.87E-02 | <i>ETSI</i>      | 0.743  | 2.45E-02 |
| <i>STK17A</i>  | 1.271  | 1.88E-02 | <i>LIMS1</i>     | 0.543  | 2.45E-02 |
| <i>VSTM1</i>   | 0.241  | 1.88E-02 | <i>STIL</i>      | -0.543 | 2.45E-02 |
| <i>NBR2</i>    | -0.588 | 1.88E-02 | <i>GZMK</i>      | 0.788  | 2.46E-02 |
| <i>B2M</i>     | 1.846  | 1.89E-02 | <i>IL15RA</i>    | 0.713  | 2.46E-02 |
| <i>MAFB</i>    | 1.212  | 1.89E-02 | <i>CCDC3</i>     | 0.613  | 2.46E-02 |
| <i>CTSZ</i>    | 1.106  | 1.89E-02 | <i>TP53I3</i>    | 0.600  | 2.46E-02 |
| <i>AAR2</i>    | -0.619 | 1.89E-02 | <i>C17orf89</i>  | -0.530 | 2.46E-02 |
| <i>ARSD</i>    | -0.676 | 1.89E-02 | <i>CMKLR1</i>    | 0.908  | 2.47E-02 |
| <i>SPOCK2</i>  | 1.379  | 1.90E-02 | <i>EFEMP1</i>    | 0.798  | 2.47E-02 |
| <i>RNF125</i>  | 0.584  | 1.90E-02 | <i>ARHGAP18</i>  | 0.767  | 2.47E-02 |
| <i>S100A7</i>  | 0.333  | 1.90E-02 | <i>CLECL1</i>    | 0.423  | 2.47E-02 |
| <i>TOM1L2</i>  | -0.760 | 1.90E-02 | <i>ANKS1B</i>    | -0.423 | 2.47E-02 |
| <i>NABP1</i>   | 1.419  | 1.91E-02 | <i>GTPBP5</i>    | -0.467 | 2.47E-02 |
| <i>RHOH</i>    | 1.111  | 1.91E-02 | <i>DLC1</i>      | 0.730  | 2.48E-02 |
| <i>LMO2</i>    | 0.865  | 1.91E-02 | <i>NAPSB</i>     | 0.720  | 2.48E-02 |
| <i>CLEC5A</i>  | 0.786  | 1.91E-02 | <i>CADM2</i>     | -0.400 | 2.48E-02 |
| <i>MMP20</i>   | 0.527  | 1.91E-02 | <i>SARNP</i>     | -0.440 | 2.48E-02 |
| <i>PRAME</i>   | 0.318  | 1.91E-02 | <i>NOP14</i>     | -0.518 | 2.48E-02 |
| <i>DDX53</i>   | -0.450 | 1.91E-02 | <i>STK10</i>     | 0.920  | 2.49E-02 |
| <i>CMTM2</i>   | -0.638 | 1.91E-02 | <i>LAMB1</i>     | 0.760  | 2.49E-02 |
| <i>PDZD4</i>   | -0.705 | 1.91E-02 | <i>LGALS3</i>    | 0.745  | 2.49E-02 |
| <i>TMEM173</i> | 1.338  | 1.92E-02 | <i>TOMM34</i>    | -0.478 | 2.49E-02 |
| <i>FCRL1</i>   | 0.587  | 1.92E-02 | <i>GKAP1</i>     | -0.530 | 2.49E-02 |
| <i>FRMD3</i>   | 0.415  | 1.92E-02 | <i>ICAM2</i>     | 0.648  | 2.50E-02 |
| <i>LYSMD1</i>  | -0.537 | 1.92E-02 | <i>FLVCR2</i>    | 0.535  | 2.50E-02 |
| <i>LCP1</i>    | 1.516  | 1.93E-02 | <i>HIST1H2BA</i> | -0.303 | 2.50E-02 |
| <i>STAT5A</i>  | 1.113  | 1.93E-02 | <i>FANCC</i>     | -0.488 | 2.50E-02 |
| <i>MOB3B</i>   | 0.641  | 1.93E-02 | <i>C19orf48</i>  | -0.563 | 2.50E-02 |
| <i>MUC16</i>   | 0.485  | 1.93E-02 | <i>CHST15</i>    | 0.643  | 2.51E-02 |
| <i>JUP</i>     | -0.662 | 1.93E-02 | <i>FMNL3</i>     | 0.607  | 2.51E-02 |
| <i>MARCO</i>   | 1.121  | 1.94E-02 | <i>TMEM71</i>    | 0.547  | 2.51E-02 |
| <i>IPCEF1</i>  | 0.859  | 1.94E-02 | <i>KLB</i>       | 0.273  | 2.51E-02 |
| <i>OR2L13</i>  | -0.452 | 1.94E-02 | <i>BRD8</i>      | -0.505 | 2.51E-02 |
| <i>EPHA6</i>   | -0.578 | 1.94E-02 | <i>SMAP2</i>     | 0.653  | 2.52E-02 |
| <i>DZANK1</i>  | -0.639 | 1.94E-02 | <i>PTPRJ</i>     | 0.553  | 2.52E-02 |

|                 |        |          |                 |        |          |
|-----------------|--------|----------|-----------------|--------|----------|
| <i>STX1A</i>    | -0.694 | 1.94E-02 | <i>CCR6</i>     | 0.370  | 2.52E-02 |
| <i>SLC9A9</i>   | 1.332  | 1.95E-02 | <i>TBR1</i>     | -0.445 | 2.52E-02 |
| <i>C3</i>       | 1.293  | 1.95E-02 | <i>MARCH9</i>   | -0.470 | 2.52E-02 |
| <i>CD8B</i>     | 0.971  | 1.95E-02 | <i>YY1AP1</i>   | -0.485 | 2.52E-02 |
| <i>KCNA3</i>    | 0.867  | 1.95E-02 | <i>NFKBIL1</i>  | -0.545 | 2.52E-02 |
| <i>IL17RB</i>   | -0.533 | 1.95E-02 | <i>GBP4</i>     | 0.703  | 2.53E-02 |
| <i>ZKSCAN2</i>  | -0.542 | 1.95E-02 | <i>MAX</i>      | 0.525  | 2.53E-02 |
| <i>MYT1L</i>    | -0.576 | 1.95E-02 | <i>RAB3IP</i>   | -0.440 | 2.53E-02 |
| <i>LMLN</i>     | -0.599 | 1.95E-02 | <i>ARHGAP24</i> | 0.670  | 2.54E-02 |
| <i>CARD11</i>   | 1.121  | 1.96E-02 | <i>CLEC2D</i>   | 0.595  | 2.54E-02 |
| <i>IL1RAPL1</i> | -0.539 | 1.96E-02 | <i>LEF1</i>     | 0.358  | 2.54E-02 |
| <i>FAM19A2</i>  | -0.560 | 1.96E-02 | <i>FAM188B</i>  | -0.360 | 2.54E-02 |
| <i>DNM1P46</i>  | -0.627 | 1.96E-02 | <i>C21orf88</i> | -0.523 | 2.54E-02 |
| <i>N6AMT2</i>   | -0.640 | 1.96E-02 | <i>HMCN1</i>    | 0.600  | 2.55E-02 |
| <i>DDX58</i>    | 1.441  | 1.97E-02 | <i>NR5A2</i>    | 0.363  | 2.55E-02 |
| <i>NAPB</i>     | -0.640 | 1.97E-02 | <i>C18orf62</i> | -0.463 | 2.55E-02 |
| <i>ZC2HC1A</i>  | -0.647 | 1.97E-02 | <i>C18orf25</i> | -0.495 | 2.55E-02 |
| <i>RNF215</i>   | -0.675 | 1.97E-02 | <i>PIF1</i>     | -0.530 | 2.55E-02 |
| <i>GPSM1</i>    | -0.725 | 1.97E-02 | <i>GINS1</i>    | -0.550 | 2.55E-02 |
| <i>AXDND1</i>   | -0.517 | 1.98E-02 | <i>IKZF1</i>    | 0.828  | 2.56E-02 |
| <i>EFCAB12</i>  | -0.595 | 1.98E-02 | <i>FAM101B</i>  | 0.453  | 2.56E-02 |
| <i>CPA1</i>     | -0.603 | 1.98E-02 | <i>SCML4</i>    | 0.540  | 2.57E-02 |
| <i>SFXN2</i>    | -0.665 | 1.98E-02 | <i>IQCF1</i>    | -0.440 | 2.57E-02 |
| <i>SP110</i>    | 1.661  | 1.99E-02 | <i>TTY12</i>    | -0.490 | 2.57E-02 |
| <i>CDH3</i>     | 0.739  | 1.99E-02 | <i>YAE1D1</i>   | -0.517 | 2.57E-02 |
| <i>GTDC1</i>    | 0.721  | 1.99E-02 | <i>PRR7</i>     | -0.518 | 2.57E-02 |
| <i>FUT11</i>    | 0.618  | 1.99E-02 | <i>F2R</i>      | 0.685  | 2.58E-02 |
| <i>CTXN1</i>    | -0.751 | 1.99E-02 | <i>PLA1A</i>    | 0.470  | 2.58E-02 |
| <i>OXNAD1</i>   | 1.066  | 2.00E-02 | <i>TIMP4</i>    | 0.388  | 2.58E-02 |
| <i>PTPRJ</i>    | 0.824  | 2.00E-02 | <i>PLEKHH1</i>  | -0.443 | 2.58E-02 |
| <i>ROPN1B</i>   | 0.167  | 2.00E-02 | <i>MPP6</i>     | -0.475 | 2.58E-02 |
| <i>SH3BP4</i>   | -0.585 | 2.00E-02 | <i>HMOX1</i>    | 0.695  | 2.59E-02 |
| <i>PCGF3</i>    | -0.601 | 2.00E-02 | <i>SGCZ</i>     | -0.367 | 2.59E-02 |
| <i>FLJ39653</i> | -0.678 | 2.00E-02 | <i>RND2</i>     | -0.485 | 2.59E-02 |
| <i>MOSPD3</i>   | -0.753 | 2.00E-02 | <i>MFNG</i>     | 0.695  | 2.60E-02 |
| <i>STK17B</i>   | 1.610  | 2.01E-02 | <i>CD247</i>    | 0.668  | 2.60E-02 |
| <i>SLAMF6</i>   | 1.211  | 2.01E-02 | <i>TRAT1</i>    | 0.570  | 2.60E-02 |
| <i>ZNF831</i>   | 0.737  | 2.01E-02 | <i>CIDEC</i>    | 0.498  | 2.60E-02 |
| <i>B3GNT1</i>   | -0.667 | 2.01E-02 | <i>SEPT8</i>    | 0.470  | 2.60E-02 |
| <i>EGFL8</i>    | -0.733 | 2.01E-02 | <i>AKR1C2</i>   | 0.298  | 2.60E-02 |
| <i>FAS</i>      | 1.465  | 2.02E-02 | <i>NLRP2</i>    | 0.133  | 2.60E-02 |
| <i>CCL28</i>    | 0.344  | 2.02E-02 | <i>TMEM216</i>  | -0.393 | 2.60E-02 |
| <i>KLHL32</i>   | -0.494 | 2.02E-02 | <i>KIAA0101</i> | -0.548 | 2.60E-02 |
| <i>OTUB2</i>    | -0.533 | 2.02E-02 | <i>ZCCHC24</i>  | 0.873  | 2.61E-02 |
| <i>LRRN2</i>    | -0.682 | 2.02E-02 | <i>GALC</i>     | 0.730  | 2.61E-02 |
| <i>RAB20</i>    | 0.851  | 2.03E-02 | <i>LPCAT2</i>   | 0.690  | 2.61E-02 |
| <i>FAXC</i>     | -0.572 | 2.03E-02 | <i>LACC1</i>    | 0.657  | 2.61E-02 |
| <i>ACP6</i>     | -0.579 | 2.03E-02 | <i>FEZ1</i>     | 0.625  | 2.61E-02 |
| <i>HLA-B</i>    | 1.910  | 2.04E-02 | <i>FGD5</i>     | 0.593  | 2.61E-02 |
| <i>NMI</i>      | 1.822  | 2.04E-02 | <i>FKBP5</i>    | 0.420  | 2.61E-02 |
| <i>IL12RB1</i>  | 1.380  | 2.04E-02 | <i>DLL1</i>     | 0.367  | 2.61E-02 |

|                  |        |          |                     |        |          |
|------------------|--------|----------|---------------------|--------|----------|
| <i>FMO3</i>      | 0.559  | 2.04E-02 | <i>CCDC152</i>      | 0.297  | 2.61E-02 |
| <i>NMNAT1</i>    | -0.577 | 2.04E-02 | <i>NLGN4X</i>       | 0.268  | 2.61E-02 |
| <i>RPL23AP32</i> | -0.603 | 2.04E-02 | <i>LOC100128893</i> | -0.437 | 2.61E-02 |
| <i>ZFP14</i>     | -0.632 | 2.04E-02 | <i>MED25</i>        | -0.495 | 2.61E-02 |
| <i>CTSW</i>      | 1.000  | 2.05E-02 | <i>THY1</i>         | 0.890  | 2.62E-02 |
| <i>CCL23</i>     | 0.573  | 2.05E-02 | <i>TGFB3</i>        | 0.783  | 2.62E-02 |
| <i>DNAJC22</i>   | -0.495 | 2.05E-02 | <i>STX6</i>         | -0.455 | 2.62E-02 |
| <i>ZNF434</i>    | -0.557 | 2.05E-02 | <i>IFITM2</i>       | 0.810  | 2.63E-02 |
| <i>RPS6KL1</i>   | -0.664 | 2.05E-02 | <i>COLEC12</i>      | 0.635  | 2.63E-02 |
| <i>MMP9</i>      | 0.960  | 2.06E-02 | <i>TAC1</i>         | 0.230  | 2.63E-02 |
| <i>AGPAT9</i>    | 0.596  | 2.06E-02 | <i>SLC29A2</i>      | -0.500 | 2.63E-02 |
| <i>RDH10</i>     | 0.555  | 2.06E-02 | <i>EMX2</i>         | 0.340  | 2.64E-02 |
| <i>TIGD4</i>     | -0.580 | 2.06E-02 | <i>HLA-DQA1</i>     | 0.375  | 2.65E-02 |
| <i>RILPL1</i>    | -0.645 | 2.06E-02 | <i>LOC285696</i>    | -0.417 | 2.65E-02 |
| <i>LCMT2</i>     | -0.646 | 2.06E-02 | <i>RMND5A</i>       | -0.475 | 2.65E-02 |
| <i>TYROBP</i>    | 1.741  | 2.07E-02 | <i>THEMIS2</i>      | 0.805  | 2.66E-02 |
| <i>PRDM1</i>     | 1.467  | 2.07E-02 | <i>TAGAP</i>        | 0.743  | 2.66E-02 |
| <i>SPIB</i>      | 1.181  | 2.07E-02 | <i>CD8A</i>         | 0.675  | 2.66E-02 |
| <i>C11orf75</i>  | 0.794  | 2.07E-02 | <i>PLEKHG4</i>      | -0.383 | 2.66E-02 |
| <i>MARCH9</i>    | -0.651 | 2.07E-02 | <i>SULF1</i>        | 0.783  | 2.67E-02 |
| <i>ITGB2</i>     | 1.713  | 2.08E-02 | <i>TAS2R5</i>       | -0.383 | 2.67E-02 |
| <i>HLA-G</i>     | 1.428  | 2.08E-02 | <i>PLAU</i>         | 0.758  | 2.68E-02 |
| <i>AR</i>        | -0.565 | 2.08E-02 | <i>CD226</i>        | 0.495  | 2.68E-02 |
| <i>FAM189A2</i>  | -0.601 | 2.08E-02 | <i>COL4A4</i>       | 0.430  | 2.68E-02 |
| <i>GRHL2</i>     | -0.620 | 2.08E-02 | <i>NCAM2</i>        | 0.270  | 2.68E-02 |
| <i>ENTPDI</i>    | 1.316  | 2.09E-02 | <i>TMEM163</i>      | 0.147  | 2.68E-02 |
| <i>CYP1B1</i>    | 0.939  | 2.09E-02 | <i>EPS15L1</i>      | -0.415 | 2.69E-02 |
| <i>CH25H</i>     | 0.777  | 2.09E-02 | <i>C15orf61</i>     | -0.477 | 2.69E-02 |
| <i>DUSP4</i>     | -0.539 | 2.09E-02 | <i>ERI3</i>         | -0.518 | 2.69E-02 |
| <i>HSD17B8</i>   | -0.700 | 2.09E-02 | <i>SKA3</i>         | -0.547 | 2.69E-02 |
| <i>VNN2</i>      | 1.255  | 2.10E-02 | <i>RAB31</i>        | 0.858  | 2.70E-02 |
| <i>SLA2</i>      | 1.203  | 2.10E-02 | <i>PRKCB</i>        | 0.700  | 2.70E-02 |
| <i>IGF2BP3</i>   | 0.563  | 2.10E-02 | <i>ANPEP</i>        | 0.568  | 2.70E-02 |
| <i>WFDC2</i>     | 0.486  | 2.10E-02 | <i>ABCG5</i>        | -0.450 | 2.70E-02 |
| <i>NR1I3</i>     | -0.549 | 2.10E-02 | <i>FLRT2</i>        | 0.723  | 2.71E-02 |
| <i>BDNF</i>      | -0.554 | 2.10E-02 | <i>PAG1</i>         | 0.593  | 2.71E-02 |
| <i>C1QTNF3</i>   | -0.634 | 2.10E-02 | <i>IL6R</i>         | 0.535  | 2.71E-02 |
| <i>PLSCR1</i>    | 1.739  | 2.11E-02 | <i>KLHL10</i>       | -0.390 | 2.71E-02 |
| <i>DPP4</i>      | 0.569  | 2.11E-02 | <i>SYT4</i>         | -0.430 | 2.71E-02 |
| <i>CCNA1</i>     | 0.353  | 2.11E-02 | <i>EMD</i>          | -0.468 | 2.71E-02 |
| <i>ZNF621</i>    | -0.627 | 2.11E-02 | <i>NPC2</i>         | 0.935  | 2.72E-02 |
| <i>SELENBP1</i>  | -0.640 | 2.11E-02 | <i>C6orf58</i>      | -0.427 | 2.72E-02 |
| <i>NFIC</i>      | -0.649 | 2.11E-02 | <i>C5orf64</i>      | -0.440 | 2.72E-02 |
| <i>LLGL2</i>     | -0.653 | 2.11E-02 | <i>EPHB3</i>        | -0.485 | 2.72E-02 |
| <i>OASL</i>      | 1.468  | 2.12E-02 | <i>PIDD</i>         | -0.550 | 2.72E-02 |
| <i>CFI</i>       | 0.972  | 2.12E-02 | <i>GLIS2</i>        | 0.560  | 2.73E-02 |
| <i>TLR10</i>     | 0.953  | 2.12E-02 | <i>KCNIP4</i>       | -0.460 | 2.73E-02 |
| <i>CLMN</i>      | -0.524 | 2.12E-02 | <i>ATP6V1B2</i>     | 0.915  | 2.74E-02 |
| <i>UGGT2</i>     | -0.616 | 2.12E-02 | <i>PTPRM</i>        | 0.818  | 2.74E-02 |
| <i>ZNF467</i>    | -0.722 | 2.12E-02 | <i>AEBP1</i>        | 0.798  | 2.74E-02 |
| <i>CCRL2</i>     | 1.115  | 2.13E-02 | <i>TMC8</i>         | 0.763  | 2.74E-02 |

|                 |        |          |                   |        |          |
|-----------------|--------|----------|-------------------|--------|----------|
| <i>PTPLAD2</i>  | 1.100  | 2.13E-02 | <i>IL2RB</i>      | 0.700  | 2.74E-02 |
| <i>MUMIL1</i>   | -0.530 | 2.13E-02 | <i>INPP1</i>      | 0.590  | 2.74E-02 |
| <i>ZNF415</i>   | -0.583 | 2.13E-02 | <i>CSGALNACT1</i> | 0.568  | 2.74E-02 |
| <i>PCBP4</i>    | -0.676 | 2.13E-02 | <i>C2orf74</i>    | 0.557  | 2.74E-02 |
| <i>FBXW9</i>    | -0.752 | 2.13E-02 | <i>ZBTB37</i>     | -0.430 | 2.74E-02 |
| <i>IFI30</i>    | 1.696  | 2.14E-02 | <i>GPRC6A</i>     | -0.483 | 2.74E-02 |
| <i>LY86</i>     | 1.563  | 2.14E-02 | <i>POLQ</i>       | -0.550 | 2.74E-02 |
| <i>CHN1</i>     | 0.777  | 2.14E-02 | <i>CSTA</i>       | 0.548  | 2.75E-02 |
| <i>PRKX</i>     | 0.609  | 2.14E-02 | <i>TMEM154</i>    | 0.477  | 2.75E-02 |
| <i>ZCCHC18</i>  | 0.584  | 2.14E-02 | <i>ARHGEF5</i>    | -0.383 | 2.75E-02 |
| <i>BMP2K</i>    | 1.073  | 2.15E-02 | <i>TRAF4</i>      | -0.470 | 2.75E-02 |
| <i>HAPLN3</i>   | 0.988  | 2.15E-02 | <i>MED26</i>      | -0.450 | 2.76E-02 |
| <i>CYP27C1</i>  | 0.323  | 2.15E-02 | <i>DDX11</i>      | -0.523 | 2.77E-02 |
| <i>LIN7A</i>    | -0.466 | 2.15E-02 | <i>ZEB1</i>       | 0.878  | 2.78E-02 |
| <i>SGK2</i>     | -0.573 | 2.15E-02 | <i>IGFBP7</i>     | 0.858  | 2.78E-02 |
| <i>PLEKHG3</i>  | -0.603 | 2.15E-02 | <i>CTHRC1</i>     | 0.580  | 2.78E-02 |
| <i>RAPH1</i>    | -0.669 | 2.15E-02 | <i>GJA1</i>       | 0.533  | 2.78E-02 |
| <i>PTDSS2</i>   | -0.699 | 2.15E-02 | <i>RBKS</i>       | -0.440 | 2.78E-02 |
| <i>TTC3</i>     | -0.778 | 2.15E-02 | <i>HEPH</i>       | 0.535  | 2.79E-02 |
| <i>ICAM3</i>    | 1.223  | 2.16E-02 | <i>SHOX2</i>      | 0.363  | 2.79E-02 |
| <i>APOC2</i>    | 0.839  | 2.16E-02 | <i>LINC00467</i>  | -0.430 | 2.79E-02 |
| <i>NFIX</i>     | -0.658 | 2.16E-02 | <i>NAPEPLD</i>    | -0.500 | 2.79E-02 |
| <i>SOCS1</i>    | 0.980  | 2.17E-02 | <i>UBN2</i>       | -0.517 | 2.79E-02 |
| <i>TBC1D4</i>   | 0.656  | 2.17E-02 | <i>SLIT3</i>      | 0.850  | 2.80E-02 |
| <i>C7orf31</i>  | 0.610  | 2.17E-02 | <i>WISP2</i>      | 0.758  | 2.80E-02 |
| <i>SH3BP5L</i>  | -0.621 | 2.17E-02 | <i>CTTNBP2</i>    | 0.277  | 2.80E-02 |
| <i>MUT</i>      | -0.758 | 2.17E-02 | <i>SPECC1</i>     | 0.197  | 2.80E-02 |
| <i>MEOX1</i>    | 0.437  | 2.18E-02 | <i>SCGB1D1</i>    | -0.400 | 2.80E-02 |
| <i>SIGLEC1</i>  | 1.565  | 2.19E-02 | <i>SELRC1</i>     | -0.495 | 2.80E-02 |
| <i>PSME2</i>    | 1.469  | 2.19E-02 | <i>NR3C1</i>      | 0.965  | 2.81E-02 |
| <i>NLRP11</i>   | -0.464 | 2.19E-02 | <i>FGFR2</i>      | -0.420 | 2.81E-02 |
| <i>OR3A2</i>    | -0.546 | 2.19E-02 | <i>ESRRB</i>      | -0.487 | 2.81E-02 |
| <i>ADCK1</i>    | -0.614 | 2.19E-02 | <i>CELF4</i>      | -0.537 | 2.81E-02 |
| <i>TNP2</i>     | -0.653 | 2.19E-02 | <i>IL2RG</i>      | 0.813  | 2.82E-02 |
| <i>SNHG8</i>    | -0.685 | 2.19E-02 | <i>KLRB1</i>      | 0.693  | 2.82E-02 |
| <i>DERL3</i>    | 0.983  | 2.20E-02 | <i>COX7A1</i>     | 0.693  | 2.82E-02 |
| <i>PDPN</i>     | 0.883  | 2.20E-02 | <i>MMP9</i>       | 0.585  | 2.82E-02 |
| <i>TXK</i>      | 0.648  | 2.20E-02 | <i>LACE1</i>      | -0.347 | 2.82E-02 |
| <i>SSBP2</i>    | -0.677 | 2.20E-02 | <i>ZNF35</i>      | -0.390 | 2.82E-02 |
| <i>TMEM61</i>   | -0.682 | 2.20E-02 | <i>VAMP5</i>      | 0.803  | 2.83E-02 |
| <i>RNF213</i>   | 1.444  | 2.21E-02 | <i>PSPH</i>       | -0.448 | 2.83E-02 |
| <i>C2orf74</i>  | 0.821  | 2.21E-02 | <i>SYNPR</i>      | -0.450 | 2.83E-02 |
| <i>ARHGAP42</i> | 0.816  | 2.21E-02 | <i>FAM64A</i>     | -0.528 | 2.83E-02 |
| <i>STK11IP</i>  | -0.682 | 2.21E-02 | <i>CD3G</i>       | 0.633  | 2.85E-02 |
| <i>TCEA2</i>    | -0.728 | 2.21E-02 | <i>CCDC43</i>     | -0.500 | 2.85E-02 |
| <i>HCK</i>      | 1.694  | 2.22E-02 | <i>COL1A1</i>     | 0.843  | 2.86E-02 |
| <i>ITGB7</i>    | 1.338  | 2.22E-02 | <i>KCNJ8</i>      | 0.650  | 2.86E-02 |
| <i>CD200R1</i>  | 0.647  | 2.22E-02 | <i>TDRKH</i>      | -0.400 | 2.86E-02 |
| <i>CXCL3</i>    | 0.600  | 2.22E-02 | <i>BTLA</i>       | 0.440  | 2.87E-02 |
| <i>ZNF862</i>   | -0.780 | 2.22E-02 | <i>HIST1H2AE</i>  | -0.335 | 2.87E-02 |
| <i>LAIR1</i>    | 1.622  | 2.23E-02 | <i>CREB3L4</i>    | -0.473 | 2.87E-02 |

|                    |        |          |                     |        |          |
|--------------------|--------|----------|---------------------|--------|----------|
| <i>DDX60L</i>      | 1.573  | 2.23E-02 | <i>KIF23</i>        | -0.543 | 2.87E-02 |
| <i>DEPDC7</i>      | 0.439  | 2.23E-02 | <i>B2M</i>          | 0.978  | 2.88E-02 |
| <i>CBY1</i>        | -0.634 | 2.23E-02 | <i>FRMD4B</i>       | 0.568  | 2.89E-02 |
| <i>GLIS1</i>       | -0.700 | 2.23E-02 | <i>SLC27A5</i>      | -0.510 | 2.89E-02 |
| <i>CD19</i>        | 0.998  | 2.24E-02 | <i>C15orf23</i>     | -0.530 | 2.89E-02 |
| <i>FMNL3</i>       | 0.909  | 2.24E-02 | <i>PCDHGB7</i>      | -0.327 | 2.90E-02 |
| <i>ACMSD</i>       | -0.541 | 2.24E-02 | <i>NLRP11</i>       | -0.333 | 2.90E-02 |
| <i>WASL</i>        | -0.646 | 2.24E-02 | <i>HIST1H1D</i>     | -0.405 | 2.90E-02 |
| <i>ZNF821</i>      | -0.718 | 2.24E-02 | <i>ZFP41</i>        | -0.407 | 2.90E-02 |
| <i>MDFIC</i>       | 1.063  | 2.25E-02 | <i>PP7080</i>       | -0.420 | 2.90E-02 |
| <i>CD1E</i>        | 0.764  | 2.25E-02 | <i>LOC100130557</i> | -0.470 | 2.90E-02 |
| <i>PGBD5</i>       | 0.367  | 2.25E-02 | <i>GULP1</i>        | 0.560  | 2.91E-02 |
| <i>PDE3A</i>       | -0.485 | 2.25E-02 | <i>FBLN7</i>        | 0.373  | 2.91E-02 |
| <i>SCGB2A2</i>     | -0.525 | 2.25E-02 | <i>NKD2</i>         | 0.350  | 2.91E-02 |
| <i>MRO</i>         | -0.583 | 2.25E-02 | <i>MED20</i>        | -0.428 | 2.91E-02 |
| <i>GPRC5C</i>      | -0.648 | 2.25E-02 | <i>ZNF707</i>       | -0.470 | 2.91E-02 |
| <i>PRNT</i>        | -0.686 | 2.25E-02 | <i>EWSR1</i>        | -0.495 | 2.91E-02 |
| <i>HELB</i>        | 0.644  | 2.26E-02 | <i>PCOLCE2</i>      | 0.255  | 2.92E-02 |
| <i>SLC7A6OS</i>    | 0.510  | 2.26E-02 | <i>INO80C</i>       | -0.433 | 2.92E-02 |
| <i>C5orf46</i>     | 0.509  | 2.26E-02 | <i>KCNG3</i>        | -0.463 | 2.92E-02 |
| <i>LYPD6B</i>      | -0.491 | 2.26E-02 | <i>ALDH1A3</i>      | 0.423  | 2.93E-02 |
| <i>WIBG</i>        | -0.639 | 2.26E-02 | <i>NHS</i>          | 0.343  | 2.93E-02 |
| <i>A1BG</i>        | -0.659 | 2.26E-02 | <i>RCAN3</i>        | -0.333 | 2.93E-02 |
| <i>CELSR3</i>      | -0.682 | 2.26E-02 | <i>ZNF704</i>       | -0.427 | 2.93E-02 |
| <i>IFI6</i>        | 1.210  | 2.27E-02 | <i>LATS1</i>        | -0.438 | 2.93E-02 |
| <i>VNN1</i>        | 0.714  | 2.27E-02 | <i>FAM195A</i>      | -0.540 | 2.93E-02 |
| <i>PIM1</i>        | 0.629  | 2.27E-02 | <i>CMAHP</i>        | 0.545  | 2.94E-02 |
| <i>C1S</i>         | 1.622  | 2.28E-02 | <i>PURB</i>         | -0.443 | 2.94E-02 |
| <i>FGD2</i>        | 1.609  | 2.28E-02 | <i>C17orf80</i>     | -0.450 | 2.94E-02 |
| <i>DENND2D</i>     | 1.005  | 2.28E-02 | <i>CCR7</i>         | 0.690  | 2.95E-02 |
| <i>FOXQ1</i>       | 0.428  | 2.28E-02 | <i>CX3CR1</i>       | 0.538  | 2.95E-02 |
| <i>UTS2D</i>       | 0.218  | 2.28E-02 | <i>GPR18</i>        | 0.535  | 2.95E-02 |
| <i>RIMKLA</i>      | -0.696 | 2.28E-02 | <i>THEMIS</i>       | 0.493  | 2.95E-02 |
| <i>ZC3H12C</i>     | 1.132  | 2.29E-02 | <i>PLA2G16</i>      | 0.440  | 2.95E-02 |
| <i>EIF2AK2</i>     | 1.043  | 2.29E-02 | <i>RGS9</i>         | -0.388 | 2.95E-02 |
| <i>ERP44</i>       | 0.902  | 2.29E-02 | <i>MT3</i>          | -0.433 | 2.95E-02 |
| <i>SLC12A2</i>     | -0.628 | 2.29E-02 | <i>ADAM32</i>       | -0.367 | 2.96E-02 |
| <i>MFNG</i>        | 1.128  | 2.30E-02 | <i>MYEOV2</i>       | -0.420 | 2.96E-02 |
| <i>CCDC19</i>      | -0.602 | 2.30E-02 | <i>NDUFAF5</i>      | -0.463 | 2.96E-02 |
| <i>ZNF777</i>      | -0.623 | 2.30E-02 | <i>RIMKLA</i>       | -0.493 | 2.96E-02 |
| <i>ZNF252P-AS1</i> | -0.638 | 2.30E-02 | <i>TLR1</i>         | 0.800  | 2.97E-02 |
| <i>SBNO1</i>       | -0.732 | 2.30E-02 | <i>EMP1</i>         | 0.773  | 2.97E-02 |
| <i>SLC2A3</i>      | 1.171  | 2.31E-02 | <i>P2RY6</i>        | 0.603  | 2.97E-02 |
| <i>RNASE1</i>      | 0.999  | 2.31E-02 | <i>BDKRB2</i>       | 0.495  | 2.97E-02 |
| <i>FAR2</i>        | 0.534  | 2.31E-02 | <i>IDI2</i>         | -0.370 | 2.97E-02 |
| <i>C5orf45</i>     | -0.686 | 2.32E-02 | <i>TRMT10A</i>      | -0.487 | 2.97E-02 |
| <i>KIAA1683</i>    | -0.738 | 2.32E-02 | <i>H1FO</i>         | -0.368 | 2.98E-02 |
| <i>TNFRSF9</i>     | 1.244  | 2.33E-02 | <i>LACTB</i>        | 0.877  | 2.99E-02 |
| <i>CTSH</i>        | 1.076  | 2.33E-02 | <i>MX2</i>          | 0.698  | 2.99E-02 |
| <i>ALDH2</i>       | 0.971  | 2.33E-02 | <i>TNIK</i>         | 0.385  | 2.99E-02 |
| <i>LGSN</i>        | -0.462 | 2.33E-02 | <i>SLC39A4</i>      | -0.495 | 2.99E-02 |



|                  |        |          |                  |        |          |
|------------------|--------|----------|------------------|--------|----------|
| <i>CYB5RL</i>    | -0.621 | 2.33E-02 | <i>MYPOP</i>     | -0.510 | 2.99E-02 |
| <i>SUOX</i>      | -0.645 | 2.33E-02 | <i>DCST1</i>     | -0.517 | 2.99E-02 |
| <i>SPRYD3</i>    | -0.659 | 2.33E-02 | <i>SP140</i>     | 0.660  | 3.00E-02 |
| <i>KIAA0195</i>  | -0.739 | 2.33E-02 | <i>LAIR2</i>     | 0.323  | 3.00E-02 |
| <i>ERAP1</i>     | 1.281  | 2.34E-02 | <i>C12orf55</i>  | -0.350 | 3.00E-02 |
| <i>STAR</i>      | 0.396  | 2.34E-02 | <i>CCDC169</i>   | -0.437 | 3.00E-02 |
| <i>MOCOS</i>     | 0.384  | 2.34E-02 | <i>YPEL1</i>     | -0.468 | 3.00E-02 |
| <i>C11orf45</i>  | 0.247  | 2.34E-02 | <i>AP1M2</i>     | -0.503 | 3.00E-02 |
| <i>SYNC</i>      | -0.624 | 2.34E-02 | <i>MAMDC2</i>    | 0.417  | 3.01E-02 |
| <i>KIAA1107</i>  | -0.698 | 2.34E-02 | <i>EGR3</i>      | 0.393  | 3.01E-02 |
| <i>RHBDF1</i>    | -0.713 | 2.34E-02 | <i>COL6A5</i>    | 0.213  | 3.01E-02 |
| <i>SPECC1</i>    | 0.308  | 2.35E-02 | <i>IGLL1</i>     | 0.205  | 3.01E-02 |
| <i>ZNF560</i>    | 0.194  | 2.35E-02 | <i>TOM1L1</i>    | -0.460 | 3.01E-02 |
| <i>APOF</i>      | -0.499 | 2.35E-02 | <i>UNC5B</i>     | 0.393  | 3.02E-02 |
| <i>CELSR2</i>    | -0.642 | 2.35E-02 | <i>CLN8</i>      | 0.298  | 3.02E-02 |
| <i>RGS19</i>     | 1.288  | 2.36E-02 | <i>HOXB6</i>     | 0.130  | 3.02E-02 |
| <i>RGL4</i>      | 0.628  | 2.36E-02 | <i>C18orf21</i>  | -0.470 | 3.02E-02 |
| <i>ZSWIM2</i>    | -0.530 | 2.37E-02 | <i>FAM136A</i>   | -0.520 | 3.02E-02 |
| <i>CDHR3</i>     | -0.564 | 2.37E-02 | <i>SMARCC1</i>   | -0.525 | 3.02E-02 |
| <i>ATP5S</i>     | -0.641 | 2.37E-02 | <i>RCAN2</i>     | 0.668  | 3.03E-02 |
| <i>RASSF2</i>    | 1.211  | 2.38E-02 | <i>FMO3</i>      | 0.358  | 3.03E-02 |
| <i>LOC728613</i> | -0.455 | 2.38E-02 | <i>GSG2</i>      | -0.533 | 3.03E-02 |
| <i>HOXB5</i>     | -0.552 | 2.38E-02 | <i>KLRG1</i>     | 0.540  | 3.04E-02 |
| <i>CNPY4</i>     | -0.588 | 2.38E-02 | <i>MMEL1</i>     | -0.443 | 3.04E-02 |
| <i>DSEL</i>      | -0.590 | 2.38E-02 | <i>C20orf132</i> | -0.453 | 3.04E-02 |
| <i>MPV17L</i>    | -0.704 | 2.38E-02 | <i>YOD1</i>      | -0.460 | 3.04E-02 |
| <i>MS4A1</i>     | 1.160  | 2.39E-02 | <i>GYPC</i>      | 0.653  | 3.05E-02 |
| <i>OBSL1</i>     | -0.666 | 2.39E-02 | <i>CLIC6</i>     | 0.323  | 3.05E-02 |
| <i>PPOX</i>      | -0.699 | 2.39E-02 | <i>KIAA1383</i>  | -0.360 | 3.05E-02 |
| <i>LRRK2</i>     | 1.148  | 2.40E-02 | <i>OTUD7B</i>    | -0.408 | 3.05E-02 |
| <i>CR2</i>       | 0.525  | 2.40E-02 | <i>SETD4</i>     | -0.418 | 3.05E-02 |
| <i>KCTD4</i>     | -0.511 | 2.40E-02 | <i>DHX35</i>     | -0.445 | 3.05E-02 |
| <i>TCP10L</i>    | -0.559 | 2.40E-02 | <i>THEM6</i>     | -0.488 | 3.05E-02 |
| <i>DFNB31</i>    | -0.646 | 2.40E-02 | <i>MSH5</i>      | -0.510 | 3.05E-02 |
| <i>DDX60</i>     | 1.695  | 2.41E-02 | <i>PMP22</i>     | 0.745  | 3.06E-02 |
| <i>NT5E</i>      | 0.906  | 2.41E-02 | <i>CAMK2D</i>    | 0.660  | 3.07E-02 |
| <i>C10orf11</i>  | 0.627  | 2.41E-02 | <i>LINC00471</i> | -0.353 | 3.07E-02 |
| <i>TM4SF18</i>   | 0.590  | 2.41E-02 | <i>TNNT1</i>     | -0.375 | 3.08E-02 |
| <i>PKNOX1</i>    | -0.495 | 2.41E-02 | <i>TMEM99</i>    | -0.417 | 3.08E-02 |
| <i>SLC25A21</i>  | -0.524 | 2.41E-02 | <i>HMHA1</i>     | 0.793  | 3.09E-02 |
| <i>RPRML</i>     | -0.653 | 2.41E-02 | <i>IGFBP4</i>    | 0.728  | 3.09E-02 |
| <i>RILPL2</i>    | 0.943  | 2.42E-02 | <i>MAGEA4</i>    | 0.125  | 3.09E-02 |
| <i>LINC00476</i> | -0.519 | 2.42E-02 | <i>SLC46A3</i>   | 0.760  | 3.10E-02 |
| <i>SLC35E2</i>   | -0.589 | 2.42E-02 | <i>COL4A1</i>    | 0.755  | 3.10E-02 |
| <i>NME4</i>      | -0.699 | 2.42E-02 | <i>FYCO1</i>     | 0.608  | 3.10E-02 |
| <i>TMEM140</i>   | 1.592  | 2.43E-02 | <i>RASA3</i>     | 0.598  | 3.10E-02 |
| <i>IL4R</i>      | 1.349  | 2.43E-02 | <i>APOD</i>      | 0.578  | 3.10E-02 |
| <i>CD47</i>      | 1.121  | 2.43E-02 | <i>LTF</i>       | 0.343  | 3.10E-02 |
| <i>ODAM</i>      | 0.431  | 2.43E-02 | <i>HEATR4</i>    | -0.357 | 3.10E-02 |
| <i>MSMB</i>      | -0.453 | 2.43E-02 | <i>DEMI</i>      | -0.380 | 3.10E-02 |
| <i>FAM20B</i>    | -0.651 | 2.43E-02 | <i>STOM</i>      | 0.680  | 3.11E-02 |

|                 |        |          |                 |        |          |
|-----------------|--------|----------|-----------------|--------|----------|
| <i>C16orf53</i> | -0.668 | 2.43E-02 | <i>CXCL9</i>    | 0.645  | 3.11E-02 |
| <i>NSUN5P2</i>  | -0.734 | 2.43E-02 | <i>BANK1</i>    | 0.470  | 3.11E-02 |
| <i>GPR133</i>   | 0.464  | 2.44E-02 | <i>LRRC2</i>    | 0.235  | 3.11E-02 |
| <i>DYDC2</i>    | -0.507 | 2.44E-02 | <i>GOLT1A</i>   | -0.430 | 3.11E-02 |
| <i>PEBP1</i>    | -0.700 | 2.44E-02 | <i>ZNF621</i>   | -0.437 | 3.11E-02 |
| <i>SLC7A4</i>   | -0.737 | 2.44E-02 | <i>ATAD5</i>    | -0.533 | 3.11E-02 |
| <i>REEP2</i>    | -0.750 | 2.44E-02 | <i>RASAL3</i>   | 0.810  | 3.12E-02 |
| <i>ADAM28</i>   | 0.914  | 2.45E-02 | <i>MS4A14</i>   | 0.487  | 3.12E-02 |
| <i>TRIM5</i>    | 0.884  | 2.45E-02 | <i>MMP12</i>    | 0.390  | 3.12E-02 |
| <i>CTHRC1</i>   | 0.864  | 2.45E-02 | <i>TEX12</i>    | -0.313 | 3.12E-02 |
| <i>DNAJC27</i>  | -0.660 | 2.45E-02 | <i>LGALS1</i>   | -0.373 | 3.12E-02 |
| <i>SCAMP4</i>   | -0.683 | 2.45E-02 | <i>DCAF4</i>    | -0.390 | 3.12E-02 |
| <i>C16orf13</i> | -0.764 | 2.45E-02 | <i>PPP1R3D</i>  | -0.410 | 3.12E-02 |
| <i>HLA-DOA</i>  | 1.548  | 2.46E-02 | <i>APOL3</i>    | 0.785  | 3.13E-02 |
| <i>KLHL11</i>   | -0.610 | 2.46E-02 | <i>CPNE8</i>    | 0.560  | 3.13E-02 |
| <i>IZUMO4</i>   | -0.702 | 2.46E-02 | <i>ETS2</i>     | 0.518  | 3.13E-02 |
| <i>SLC18B1</i>  | 0.813  | 2.47E-02 | <i>DCAF17</i>   | -0.518 | 3.13E-02 |
| <i>SMARCC2</i>  | -0.730 | 2.47E-02 | <i>RPL36</i>    | -0.523 | 3.13E-02 |
| <i>NR2F6</i>    | -0.743 | 2.47E-02 | <i>PRPF19</i>   | -0.528 | 3.13E-02 |
| <i>AIF1</i>     | 1.776  | 2.48E-02 | <i>DDX60L</i>   | 0.813  | 3.14E-02 |
| <i>TMEM132B</i> | -0.491 | 2.48E-02 | <i>TNC</i>      | 0.655  | 3.14E-02 |
| <i>RSAD1</i>    | -0.669 | 2.48E-02 | <i>GATM</i>     | 0.405  | 3.14E-02 |
| <i>SH3GL1</i>   | -0.708 | 2.48E-02 | <i>TCF7</i>     | 0.358  | 3.14E-02 |
| <i>TAPBPL</i>   | 1.124  | 2.49E-02 | <i>DHX57</i>    | -0.413 | 3.14E-02 |
| <i>MATN3</i>    | -0.523 | 2.49E-02 | <i>HCST</i>     | 0.767  | 3.15E-02 |
| <i>OBFC1</i>    | -0.587 | 2.49E-02 | <i>PRF1</i>     | 0.708  | 3.15E-02 |
| <i>PAQR6</i>    | -0.646 | 2.49E-02 | <i>ABLIM3</i>   | 0.590  | 3.15E-02 |
| <i>FOXH1</i>    | -0.744 | 2.49E-02 | <i>CD274</i>    | 0.567  | 3.15E-02 |
| <i>POLL</i>     | -0.755 | 2.49E-02 | <i>WDR31</i>    | -0.353 | 3.15E-02 |
| <i>TTL3</i>     | -0.766 | 2.49E-02 | <i>CCNB3</i>    | -0.403 | 3.15E-02 |
| <i>CD300A</i>   | 1.482  | 2.50E-02 | <i>TRIM45</i>   | -0.438 | 3.15E-02 |
| <i>HENMT1</i>   | 0.505  | 2.50E-02 | <i>SUGP2</i>    | -0.495 | 3.15E-02 |
| <i>UBE2QL1</i>  | 0.387  | 2.50E-02 | <i>RFC2</i>     | -0.555 | 3.15E-02 |
| <i>NEURL2</i>   | -0.599 | 2.50E-02 | <i>MAN2A1</i>   | 0.670  | 3.16E-02 |
| <i>BCL9</i>     | -0.600 | 2.50E-02 | <i>TBRG1</i>    | 0.627  | 3.16E-02 |
| <i>SLCO2B1</i>  | 1.389  | 2.51E-02 | <i>CR1</i>      | 0.618  | 3.16E-02 |
| <i>CTSL2</i>    | 0.485  | 2.51E-02 | <i>IFI27</i>    | 0.585  | 3.16E-02 |
| <i>PCDHB5</i>   | -0.467 | 2.51E-02 | <i>UBD</i>      | 0.485  | 3.16E-02 |
| <i>WDFY4</i>    | 1.362  | 2.53E-02 | <i>CLEC5A</i>   | 0.455  | 3.16E-02 |
| <i>LXN</i>      | 0.851  | 2.53E-02 | <i>GLDN</i>     | 0.287  | 3.16E-02 |
| <i>INPP4A</i>   | 0.849  | 2.53E-02 | <i>CNIH3</i>    | 0.235  | 3.16E-02 |
| <i>PLTP</i>     | 0.829  | 2.53E-02 | <i>LCE1E</i>    | -0.450 | 3.16E-02 |
| <i>TES</i>      | 0.778  | 2.53E-02 | <i>TIMM10</i>   | -0.538 | 3.16E-02 |
| <i>IER5</i>     | 0.778  | 2.53E-02 | <i>SYNDIG1</i>  | 0.515  | 3.17E-02 |
| <i>NLGN4Y</i>   | -0.485 | 2.53E-02 | <i>MRPL55</i>   | -0.540 | 3.17E-02 |
| <i>PCDH9</i>    | -0.533 | 2.53E-02 | <i>PALLD</i>    | 0.780  | 3.18E-02 |
| <i>CKB</i>      | -0.561 | 2.53E-02 | <i>AIM2</i>     | 0.620  | 3.18E-02 |
| <i>CCDC169</i>  | -0.601 | 2.53E-02 | <i>MYO1D</i>    | 0.515  | 3.18E-02 |
| <i>TMC4</i>     | -0.685 | 2.53E-02 | <i>FAAH2</i>    | -0.393 | 3.18E-02 |
| <i>ZNF598</i>   | -0.779 | 2.53E-02 | <i>HIST1H1A</i> | -0.468 | 3.18E-02 |
| <i>LAYN</i>     | 0.917  | 2.54E-02 | <i>VIM</i>      | 0.885  | 3.19E-02 |

|                 |        |          |                   |        |          |
|-----------------|--------|----------|-------------------|--------|----------|
| <i>VTN</i>      | -0.588 | 2.54E-02 | <i>LATS2</i>      | 0.800  | 3.19E-02 |
| <i>DNASE1L3</i> | 0.599  | 2.55E-02 | <i>HERPUD1</i>    | 0.758  | 3.19E-02 |
| <i>ADTRP</i>    | 0.382  | 2.55E-02 | <i>RNF130</i>     | 0.675  | 3.19E-02 |
| <i>ADAMTS17</i> | -0.550 | 2.55E-02 | <i>CNN2</i>       | 0.670  | 3.19E-02 |
| <i>FRY</i>      | -0.660 | 2.55E-02 | <i>LAMA2</i>      | 0.643  | 3.19E-02 |
| <i>CHST12</i>   | 0.769  | 2.56E-02 | <i>ITSN1</i>      | 0.600  | 3.19E-02 |
| <i>IL1R2</i>    | 0.663  | 2.56E-02 | <i>LRP2BP</i>     | -0.380 | 3.19E-02 |
| <i>SPATA17</i>  | -0.500 | 2.56E-02 | <i>CHMP4C</i>     | -0.393 | 3.19E-02 |
| <i>ATP9B</i>    | -0.516 | 2.56E-02 | <i>APBA2</i>      | -0.398 | 3.19E-02 |
| <i>KCNJ11</i>   | -0.559 | 2.56E-02 | <i>NXT1</i>       | -0.510 | 3.19E-02 |
| <i>SUMF2</i>    | -0.569 | 2.56E-02 | <i>DPEP2</i>      | 0.740  | 3.20E-02 |
| <i>CASP4</i>    | 1.572  | 2.57E-02 | <i>ITPRIPL2</i>   | 0.603  | 3.20E-02 |
| <i>CCDC109B</i> | 1.015  | 2.57E-02 | <i>CASP8</i>      | 0.513  | 3.20E-02 |
| <i>RTN1</i>     | 0.537  | 2.57E-02 | <i>EDNRB</i>      | 0.468  | 3.20E-02 |
| <i>HSF5</i>     | 0.289  | 2.57E-02 | <i>TP53RK</i>     | -0.470 | 3.20E-02 |
| <i>C1orf204</i> | -0.556 | 2.57E-02 | <i>GOLGA2P5</i>   | -0.473 | 3.20E-02 |
| <i>SEC14L2</i>  | -0.604 | 2.57E-02 | <i>RABGAP1L</i>   | 0.650  | 3.21E-02 |
| <i>VSIG4</i>    | 1.221  | 2.58E-02 | <i>ELMO3</i>      | -0.478 | 3.21E-02 |
| <i>EPHX3</i>    | 0.567  | 2.58E-02 | <i>MACROD1</i>    | -0.508 | 3.21E-02 |
| <i>HCG27</i>    | 0.528  | 2.58E-02 | <i>SNORD114-3</i> | 0.247  | 3.22E-02 |
| <i>SPR</i>      | -0.650 | 2.58E-02 | <i>NOL4</i>       | -0.403 | 3.22E-02 |
| <i>FUK</i>      | -0.727 | 2.58E-02 | <i>FN3K</i>       | -0.420 | 3.22E-02 |
| <i>RASAL3</i>   | 1.505  | 2.59E-02 | <i>NCAPD3</i>     | -0.520 | 3.22E-02 |
| <i>PARVG</i>    | 1.406  | 2.59E-02 | <i>PRDM1</i>      | 0.750  | 3.23E-02 |
| <i>SH2D1A</i>   | 1.229  | 2.59E-02 | <i>PPM1L</i>      | -0.300 | 3.23E-02 |
| <i>STK32B</i>   | -0.494 | 2.60E-02 | <i>COX8C</i>      | -0.367 | 3.23E-02 |
| <i>ANKMY1</i>   | -0.558 | 2.60E-02 | <i>PRDM13</i>     | -0.425 | 3.23E-02 |
| <i>SARNP</i>    | -0.590 | 2.60E-02 | <i>POU2F1</i>     | -0.453 | 3.23E-02 |
| <i>MARCKS</i>   | 1.065  | 2.61E-02 | <i>HCK</i>        | 0.860  | 3.24E-02 |
| <i>TTC39B</i>   | 0.506  | 2.61E-02 | <i>A2M</i>        | 0.713  | 3.24E-02 |
| <i>PHF7</i>     | -0.550 | 2.61E-02 | <i>KLHL29</i>     | 0.367  | 3.24E-02 |
| <i>PVT1</i>     | -0.587 | 2.61E-02 | <i>MSX2</i>       | 0.160  | 3.24E-02 |
| <i>BHLHB9</i>   | -0.587 | 2.61E-02 | <i>IQCH</i>       | -0.400 | 3.24E-02 |
| <i>ZNF839</i>   | -0.650 | 2.61E-02 | <i>EFNA1</i>      | -0.408 | 3.24E-02 |
| <i>IFIT5</i>    | 1.411  | 2.62E-02 | <i>DDX25</i>      | -0.430 | 3.24E-02 |
| <i>ETV7</i>     | 1.270  | 2.62E-02 | <i>MOB3C</i>      | 0.623  | 3.25E-02 |
| <i>EHD4</i>     | 1.075  | 2.62E-02 | <i>BLNK</i>       | 0.420  | 3.25E-02 |
| <i>GPNMB</i>    | 1.027  | 2.62E-02 | <i>FCRLA</i>      | 0.373  | 3.25E-02 |
| <i>KRT6B</i>    | 0.638  | 2.62E-02 | <i>SMAD9</i>      | -0.423 | 3.25E-02 |
| <i>RPS4Y1</i>   | -0.405 | 2.62E-02 | <i>ZC3HC1</i>     | -0.490 | 3.25E-02 |
| <i>EYA1</i>     | -0.567 | 2.62E-02 | <i>KRII</i>       | -0.530 | 3.25E-02 |
| <i>REM2</i>     | -0.621 | 2.62E-02 | <i>SP140L</i>     | 0.595  | 3.26E-02 |
| <i>EPS8L2</i>   | -0.633 | 2.62E-02 | <i>RHOH</i>       | 0.565  | 3.26E-02 |
| <i>TBXAS1</i>   | 1.069  | 2.63E-02 | <i>LAMP3</i>      | 0.475  | 3.26E-02 |
| <i>ELL3</i>     | -0.516 | 2.63E-02 | <i>FZD3</i>       | -0.440 | 3.26E-02 |
| <i>HOXC5</i>    | -0.535 | 2.63E-02 | <i>RAB33A</i>     | 0.325  | 3.27E-02 |
| <i>NLRC4</i>    | 0.982  | 2.64E-02 | <i>LOC654433</i>  | 0.120  | 3.27E-02 |
| <i>SLC25A53</i> | 0.308  | 2.64E-02 | <i>SNORD8</i>     | -0.367 | 3.27E-02 |
| <i>ADAM3A</i>   | -0.535 | 2.64E-02 | <i>NELL1</i>      | -0.448 | 3.27E-02 |
| <i>SLC25A41</i> | -0.590 | 2.64E-02 | <i>CLPB</i>       | -0.485 | 3.27E-02 |
| <i>SLC9A1</i>   | -0.646 | 2.64E-02 | <i>EPRS</i>       | -0.495 | 3.27E-02 |

|                  |        |          |                          |        |          |
|------------------|--------|----------|--------------------------|--------|----------|
| <i>PPP1R13L</i>  | -0.684 | 2.64E-02 | <i>SRRT</i>              | -0.543 | 3.27E-02 |
| <i>SYTL1</i>     | -0.693 | 2.64E-02 | <i>TPP1</i>              | 1.010  | 3.28E-02 |
| <i>SERPING1</i>  | 1.362  | 2.65E-02 | <i>SLFN12</i>            | 0.575  | 3.28E-02 |
| <i>ELF4</i>      | 1.234  | 2.65E-02 | <i>DFNA5</i>             | 0.555  | 3.28E-02 |
| <i>FNBP1</i>     | 1.221  | 2.65E-02 | <i>AQP11</i>             | -0.367 | 3.28E-02 |
| <i>CHI3L1</i>    | 0.602  | 2.65E-02 | <i>LINC00339</i>         | -0.385 | 3.28E-02 |
| <i>RNF150</i>    | 0.579  | 2.65E-02 | <i>MAPKAPK5-<br/>AS1</i> | -0.450 | 3.28E-02 |
| <i>CDKN2A</i>    | 0.457  | 2.65E-02 | <i>PPP1R35</i>           | -0.473 | 3.28E-02 |
| <i>HOXD4</i>     | -0.524 | 2.65E-02 | <i>ASPN</i>              | 0.500  | 3.29E-02 |
| <i>ARAP3</i>     | -0.586 | 2.65E-02 | <i>ZIC1</i>              | -0.323 | 3.29E-02 |
| <i>DOK6</i>      | -0.600 | 2.65E-02 | <i>E2F7</i>              | -0.493 | 3.29E-02 |
| <i>GBA2</i>      | -0.623 | 2.65E-02 | <i>ZNF783</i>            | -0.505 | 3.29E-02 |
| <i>PDDC1</i>     | -0.681 | 2.65E-02 | <i>FMNL2</i>             | 0.533  | 3.30E-02 |
| <i>KRBA1</i>     | -0.754 | 2.65E-02 | <i>TAF1B</i>             | -0.478 | 3.30E-02 |
| <i>ZNF446</i>    | -0.789 | 2.65E-02 | <i>VEPH1</i>             | -0.347 | 3.31E-02 |
| <i>STEAP1</i>    | 0.574  | 2.66E-02 | <i>ASB13</i>             | -0.403 | 3.31E-02 |
| <i>IL7</i>       | 0.526  | 2.66E-02 | <i>CCDC77</i>            | -0.487 | 3.31E-02 |
| <i>PPME1</i>     | -0.579 | 2.66E-02 | <i>CXCL11</i>            | 0.438  | 3.32E-02 |
| <i>MACROD1</i>   | -0.708 | 2.66E-02 | <i>C6orf164</i>          | -0.377 | 3.32E-02 |
| <i>MYO1F</i>     | 1.661  | 2.67E-02 | <i>SPAG5</i>             | -0.533 | 3.32E-02 |
| <i>DOCK11</i>    | 1.472  | 2.67E-02 | <i>STAB1</i>             | 0.900  | 3.33E-02 |
| <i>NFKB1</i>     | 1.183  | 2.67E-02 | <i>WDFY1</i>             | 0.750  | 3.33E-02 |
| <i>ASB2</i>      | 0.586  | 2.67E-02 | <i>CST7</i>              | 0.690  | 3.33E-02 |
| <i>HIST1H2AB</i> | -0.542 | 2.67E-02 | <i>EGR1</i>              | 0.420  | 3.33E-02 |
| <i>ASB1</i>      | -0.559 | 2.67E-02 | <i>TNFRSF11A</i>         | 0.228  | 3.33E-02 |
| <i>ARL3</i>      | -0.565 | 2.67E-02 | <i>C7orf29</i>           | 0.167  | 3.33E-02 |
| <i>ZMYND8</i>    | -0.635 | 2.67E-02 | <i>SLC25A21</i>          | -0.373 | 3.33E-02 |
| <i>COTL1</i>     | 1.319  | 2.68E-02 | <i>C11orf84</i>          | -0.467 | 3.33E-02 |
| <i>CXCL16</i>    | 1.156  | 2.68E-02 | <i>WDR74</i>             | -0.538 | 3.33E-02 |
| <i>EMR1</i>      | 0.976  | 2.68E-02 | <i>GLUL</i>              | 0.443  | 3.34E-02 |
| <i>MCTP1</i>     | 0.828  | 2.68E-02 | <i>GCNT3</i>             | -0.398 | 3.34E-02 |
| <i>REC8</i>      | 0.683  | 2.68E-02 | <i>BHLHE22</i>           | 0.560  | 3.35E-02 |
| <i>ARHGAP22</i>  | 0.607  | 2.68E-02 | <i>CCDC102B</i>          | 0.375  | 3.35E-02 |
| <i>JAKMIP1</i>   | 0.387  | 2.68E-02 | <i>P2RX5</i>             | 0.358  | 3.35E-02 |
| <i>CERS5</i>     | -0.571 | 2.69E-02 | <i>ZNF418</i>            | -0.433 | 3.35E-02 |
| <i>KIRREL2</i>   | -0.693 | 2.69E-02 | <i>METTL13</i>           | -0.505 | 3.35E-02 |
| <i>CXCL6</i>     | 0.443  | 2.70E-02 | <i>SNRNP25</i>           | -0.545 | 3.35E-02 |
| <i>JAKMIP2</i>   | 0.381  | 2.70E-02 | <i>TNS3</i>              | 0.673  | 3.36E-02 |
| <i>LOC283481</i> | -0.543 | 2.70E-02 | <i>UBASH3A</i>           | 0.548  | 3.36E-02 |
| <i>APBB2</i>     | -0.584 | 2.70E-02 | <i>ACTR5</i>             | -0.455 | 3.36E-02 |
| <i>SLC41A2</i>   | 0.982  | 2.71E-02 | <i>CCDC114</i>           | -0.483 | 3.36E-02 |
| <i>GREM1</i>     | 0.673  | 2.71E-02 | <i>OPN5</i>              | -0.563 | 3.36E-02 |
| <i>TOX</i>       | 0.423  | 2.71E-02 | <i>SERPINE1</i>          | 0.805  | 3.37E-02 |
| <i>FLNB</i>      | -0.578 | 2.71E-02 | <i>CD1C</i>              | 0.633  | 3.37E-02 |
| <i>PPDPF</i>     | -0.684 | 2.71E-02 | <i>MAGEA12</i>           | 0.145  | 3.37E-02 |
| <i>RNF166</i>    | 0.886  | 2.72E-02 | <i>FAM228A</i>           | -0.373 | 3.37E-02 |
| <i>UMODL1</i>    | -0.463 | 2.72E-02 | <i>MARCH4</i>            | -0.450 | 3.37E-02 |
| <i>LRRC46</i>    | -0.575 | 2.72E-02 | <i>EPN3</i>              | -0.463 | 3.37E-02 |
| <i>ASIC3</i>     | -0.609 | 2.72E-02 | <i>ARHGAP11A</i>         | -0.515 | 3.37E-02 |
| <i>SLC2A11</i>   | -0.627 | 2.72E-02 | <i>PLAT</i>              | 0.553  | 3.38E-02 |

|                     |        |          |                  |        |          |
|---------------------|--------|----------|------------------|--------|----------|
| <i>C5orf56</i>      | 0.725  | 2.73E-02 | <i>C7</i>        | 0.545  | 3.38E-02 |
| <i>MAML3</i>        | -0.509 | 2.73E-02 | <i>GABRA5</i>    | -0.468 | 3.38E-02 |
| <i>DLG3</i>         | -0.560 | 2.73E-02 | <i>MAGII</i>     | -0.475 | 3.38E-02 |
| <i>FAM100A</i>      | -0.713 | 2.73E-02 | <i>COL14A1</i>   | 0.740  | 3.39E-02 |
| <i>TBC1D10C</i>     | 1.377  | 2.74E-02 | <i>LOC375295</i> | 0.260  | 3.39E-02 |
| <i>TMEM154</i>      | 0.617  | 2.74E-02 | <i>XRRAl</i>     | -0.293 | 3.39E-02 |
| <i>TNFRSF10A</i>    | 0.577  | 2.74E-02 | <i>FAM184B</i>   | -0.370 | 3.39E-02 |
| <i>TNFRSF11B</i>    | 0.458  | 2.74E-02 | <i>ZFYVE9</i>    | -0.410 | 3.39E-02 |
| <i>KIAA1875</i>     | -0.691 | 2.74E-02 | <i>RPRD1A</i>    | -0.548 | 3.39E-02 |
| <i>BEND4</i>        | 0.268  | 2.75E-02 | <i>FBLN1</i>     | 0.898  | 3.40E-02 |
| <i>RGS7BP</i>       | -0.453 | 2.75E-02 | <i>GIT2</i>      | 0.730  | 3.40E-02 |
| <i>ARSK</i>         | -0.555 | 2.75E-02 | <i>LAT</i>       | 0.650  | 3.40E-02 |
| <i>CNTN1</i>        | -0.564 | 2.75E-02 | <i>ADAMTSL4</i>  | 0.470  | 3.40E-02 |
| <i>CST9</i>         | -0.597 | 2.75E-02 | <i>GIPC2</i>     | 0.255  | 3.40E-02 |
| <i>ZNF706</i>       | -0.599 | 2.75E-02 | <i>ZNF8</i>      | -0.400 | 3.40E-02 |
| <i>PELI3</i>        | -0.624 | 2.75E-02 | <i>MGAT1</i>     | 0.920  | 3.41E-02 |
| <i>PLA2G4C</i>      | 0.770  | 2.76E-02 | <i>UBE2QL1</i>   | 0.240  | 3.41E-02 |
| <i>SGSM1</i>        | -0.759 | 2.76E-02 | <i>CXorf69</i>   | 0.213  | 3.41E-02 |
| <i>ADAP2</i>        | 1.239  | 2.77E-02 | <i>GARNL3</i>    | -0.423 | 3.41E-02 |
| <i>GNA15</i>        | 0.963  | 2.77E-02 | <i>TUBB2A</i>    | 0.500  | 3.42E-02 |
| <i>POLR2J4</i>      | -0.551 | 2.77E-02 | <i>INPP4B</i>    | 0.355  | 3.42E-02 |
| <i>ORM1</i>         | 0.222  | 2.78E-02 | <i>ZSCAN22</i>   | -0.357 | 3.42E-02 |
| <i>TSPAN13</i>      | -0.561 | 2.78E-02 | <i>GPX8</i>      | 0.703  | 3.43E-02 |
| <i>PSME1</i>        | 1.470  | 2.79E-02 | <i>SPATS2L</i>   | 0.600  | 3.43E-02 |
| <i>TCP11L1</i>      | 0.629  | 2.79E-02 | <i>SLCO2A1</i>   | 0.580  | 3.43E-02 |
| <i>CYP27B1</i>      | 0.526  | 2.79E-02 | <i>TMTC1</i>     | 0.447  | 3.43E-02 |
| <i>FKBP5</i>        | 0.522  | 2.79E-02 | <i>EDEMI</i>     | 0.620  | 3.44E-02 |
| <i>SECTM1</i>       | 1.129  | 2.80E-02 | <i>PTGFRN</i>    | 0.440  | 3.44E-02 |
| <i>GFPT2</i>        | 0.963  | 2.80E-02 | <i>EFCAB4B</i>   | -0.387 | 3.44E-02 |
| <i>SNX18</i>        | 0.426  | 2.80E-02 | <i>DPH3P1</i>    | -0.443 | 3.44E-02 |
| <i>RGS10</i>        | 0.737  | 2.81E-02 | <i>BMP2K</i>     | 0.620  | 3.45E-02 |
| <i>AFMID</i>        | -0.552 | 2.81E-02 | <i>FBP1</i>      | 0.438  | 3.45E-02 |
| <i>ATP6AP1L</i>     | -0.607 | 2.81E-02 | <i>FDCSP</i>     | 0.207  | 3.45E-02 |
| <i>C12orf76</i>     | -0.614 | 2.81E-02 | <i>SKAP2</i>     | 0.805  | 3.46E-02 |
| <i>DLX2</i>         | -0.616 | 2.81E-02 | <i>CARD8</i>     | 0.738  | 3.46E-02 |
| <i>PSMB10</i>       | 1.614  | 2.82E-02 | <i>RBBP4</i>     | -0.487 | 3.46E-02 |
| <i>MAP4K1</i>       | 1.481  | 2.82E-02 | <i>RAB42</i>     | 0.173  | 3.47E-02 |
| <i>TMEM170A</i>     | 0.799  | 2.82E-02 | <i>TUSC1</i>     | -0.373 | 3.47E-02 |
| <i>LOC100169752</i> | -0.452 | 2.82E-02 | <i>CD2</i>       | 0.718  | 3.48E-02 |
| <i>CCDC158</i>      | -0.546 | 2.82E-02 | <i>SH3D19</i>    | 0.653  | 3.48E-02 |
| <i>SLC15A3</i>      | 1.595  | 2.83E-02 | <i>PDE2A</i>     | 0.593  | 3.48E-02 |
| <i>PIP4K2C</i>      | -0.519 | 2.83E-02 | <i>DIS3L2</i>    | -0.390 | 3.48E-02 |
| <i>PCLO</i>         | -0.646 | 2.83E-02 | <i>ZNF142</i>    | -0.468 | 3.48E-02 |
| <i>JAZF1</i>        | 1.045  | 2.84E-02 | <i>LOC202781</i> | -0.617 | 3.48E-02 |
| <i>COL6A5</i>       | 0.305  | 2.84E-02 | <i>UGCG</i>      | 0.610  | 3.49E-02 |
| <i>MOB3C</i>        | 0.955  | 2.85E-02 | <i>SLAMF1</i>    | 0.553  | 3.49E-02 |
| <i>CUEDC1</i>       | -0.599 | 2.85E-02 | <i>PALMD</i>     | 0.473  | 3.49E-02 |
| <i>INPP5D</i>       | 1.248  | 2.86E-02 | <i>ANTXR1</i>    | 0.698  | 3.50E-02 |
| <i>FBXO6</i>        | 1.002  | 2.86E-02 | <i>RGS1</i>      | 0.493  | 3.50E-02 |
| <i>KLRG1</i>        | 0.757  | 2.86E-02 | <i>PIM2</i>      | 0.450  | 3.50E-02 |
| <i>FNDC5</i>        | -0.662 | 2.86E-02 | <i>SPATA5</i>    | -0.480 | 3.50E-02 |

|                    |        |          |                    |        |          |
|--------------------|--------|----------|--------------------|--------|----------|
| <i>C20orf79</i>    | -0.664 | 2.86E-02 | <i>MIR100HG</i>    | 0.620  | 3.51E-02 |
| <i>RORC</i>        | -0.676 | 2.87E-02 | <i>NLRC4</i>       | 0.583  | 3.51E-02 |
| <i>GAS2L1</i>      | -0.678 | 2.87E-02 | <i>CD38</i>        | 0.443  | 3.51E-02 |
| <i>ZNF10</i>       | -0.686 | 2.87E-02 | <i>DOK7</i>        | -0.387 | 3.51E-02 |
| <i>APOBEC3B</i>    | 0.754  | 2.88E-02 | <i>C10orf122</i>   | -0.413 | 3.51E-02 |
| <i>ATP10A</i>      | 0.485  | 2.88E-02 | <i>PPM1J</i>       | -0.423 | 3.51E-02 |
| <i>ENOSF1</i>      | -0.599 | 2.88E-02 | <i>KRTAP7-1</i>    | -0.440 | 3.51E-02 |
| <i>FAM211B</i>     | -0.680 | 2.88E-02 | <i>FAM184A</i>     | -0.453 | 3.51E-02 |
| <i>OPTN</i>        | 1.564  | 2.89E-02 | <i>POLA2</i>       | -0.530 | 3.51E-02 |
| <i>CLDN1</i>       | 0.573  | 2.89E-02 | <i>FBLN5</i>       | 0.665  | 3.52E-02 |
| <i>ARHGAP5-AS1</i> | -0.520 | 2.89E-02 | <i>PHLDB2</i>      | 0.620  | 3.52E-02 |
| <i>FGGY</i>        | -0.536 | 2.89E-02 | <i>CPED1</i>       | 0.583  | 3.52E-02 |
| <i>SLC35B2</i>     | -0.654 | 2.89E-02 | <i>SULF2</i>       | 0.500  | 3.52E-02 |
| <i>ZC3HAV1</i>     | 0.837  | 2.90E-02 | <i>GALNT10</i>     | 0.465  | 3.52E-02 |
| <i>STON2</i>       | -0.498 | 2.90E-02 | <i>KIAA1257</i>    | -0.380 | 3.52E-02 |
| <i>ZFYVE9</i>      | -0.574 | 2.90E-02 | <i>FAAH</i>        | -0.483 | 3.52E-02 |
| <i>KIAA1407</i>    | -0.694 | 2.90E-02 | <i>ISMI</i>        | 0.263  | 3.53E-02 |
| <i>DHX32</i>       | -0.495 | 2.91E-02 | <i>SGPP2</i>       | 0.210  | 3.53E-02 |
| <i>GSTA4</i>       | -0.609 | 2.91E-02 | <i>DZANK1</i>      | -0.425 | 3.53E-02 |
| <i>MTX3</i>        | -0.658 | 2.91E-02 | <i>SPPL2A</i>      | 0.853  | 3.54E-02 |
| <i>ARHGAP17</i>    | 0.785  | 2.93E-02 | <i>CD302</i>       | 0.690  | 3.54E-02 |
| <i>DYRK2</i>       | 0.696  | 2.93E-02 | <i>CLEC10A</i>     | 0.638  | 3.54E-02 |
| <i>FERMT1</i>      | 0.565  | 2.93E-02 | <i>FAM49A</i>      | 0.550  | 3.54E-02 |
| <i>SAMD12</i>      | -0.423 | 2.93E-02 | <i>FAM89A</i>      | 0.193  | 3.54E-02 |
| <i>SCUBE2</i>      | -0.563 | 2.93E-02 | <i>MKNK1</i>       | 0.615  | 3.55E-02 |
| <i>HECTD2</i>      | -0.685 | 2.93E-02 | <i>RSBNIL</i>      | -0.460 | 3.55E-02 |
| <i>FLII</i>        | 1.312  | 2.94E-02 | <i>GBP2</i>        | 0.853  | 3.56E-02 |
| <i>SCARF1</i>      | 0.652  | 2.94E-02 | <i>IFI30</i>       | 0.840  | 3.56E-02 |
| <i>ZNF233</i>      | -0.499 | 2.94E-02 | <i>ACTC1</i>       | 0.388  | 3.56E-02 |
| <i>E4F1</i>        | -0.749 | 2.94E-02 | <i>HARIA</i>       | 0.280  | 3.56E-02 |
| <i>SPPL2B</i>      | -0.758 | 2.94E-02 | <i>PITPNC1</i>     | 0.248  | 3.56E-02 |
| <i>CORO1A</i>      | 1.410  | 2.95E-02 | <i>LINC00515</i>   | -0.337 | 3.56E-02 |
| <i>OLFM4</i>       | 0.166  | 2.96E-02 | <i>RAB8B</i>       | 0.938  | 3.57E-02 |
| <i>HTT</i>         | -0.660 | 2.96E-02 | <i>MYOF</i>        | 0.808  | 3.57E-02 |
| <i>CFLAR</i>       | 1.362  | 2.97E-02 | <i>SERPINB1</i>    | 0.743  | 3.57E-02 |
| <i>HLA-J</i>       | 1.340  | 2.97E-02 | <i>WLS</i>         | 0.518  | 3.57E-02 |
| <i>EBI3</i>        | 1.051  | 2.97E-02 | <i>B3GNT9</i>      | 0.503  | 3.57E-02 |
| <i>C8orf4</i>      | 0.495  | 2.97E-02 | <i>DTX4</i>        | 0.268  | 3.57E-02 |
| <i>RGS7</i>        | -0.518 | 2.97E-02 | <i>FBXL21</i>      | -0.387 | 3.57E-02 |
| <i>PCSK6</i>       | -0.593 | 2.97E-02 | <i>CBLC</i>        | -0.458 | 3.57E-02 |
| <i>MYH10</i>       | -0.619 | 2.97E-02 | <i>COL5A1</i>      | 0.855  | 3.58E-02 |
| <i>SLC26A10</i>    | -0.660 | 2.97E-02 | <i>FAIM3</i>       | 0.600  | 3.58E-02 |
| <i>ANKRD19P</i>    | -0.472 | 2.98E-02 | <i>MAGEF1</i>      | -0.440 | 3.58E-02 |
| <i>UBXN10</i>      | -0.522 | 2.98E-02 | <i>PLCG2</i>       | 0.540  | 3.59E-02 |
| <i>DNAL1</i>       | -0.558 | 2.98E-02 | <i>CYP11B1-AS1</i> | 0.140  | 3.59E-02 |
| <i>NEK11</i>       | -0.612 | 2.98E-02 | <i>POU2F3</i>      | -0.368 | 3.59E-02 |
| <i>KHDRBS2</i>     | -0.699 | 2.98E-02 | <i>ZNF568</i>      | -0.400 | 3.59E-02 |
| <i>C1R</i>         | 1.416  | 2.99E-02 | <i>SPATA6</i>      | -0.400 | 3.59E-02 |
| <i>TGM2</i>        | 1.120  | 2.99E-02 | <i>CDCA4</i>       | -0.510 | 3.59E-02 |
| <i>ZNF438</i>      | 0.712  | 2.99E-02 | <i>MRT04</i>       | -0.535 | 3.59E-02 |
| <i>CARD9</i>       | 0.626  | 2.99E-02 | <i>HSD11B1L</i>    | -0.550 | 3.59E-02 |

|                   |        |          |                  |        |          |
|-------------------|--------|----------|------------------|--------|----------|
| <i>TXLNB</i>      | 0.313  | 2.99E-02 | <i>ANXA1</i>     | 0.808  | 3.60E-02 |
| <i>HN1L</i>       | -0.653 | 2.99E-02 | <i>LOC388692</i> | 0.410  | 3.60E-02 |
| <i>AAED1</i>      | 0.974  | 3.00E-02 | <i>LOH12CR2</i>  | -0.400 | 3.60E-02 |
| <i>CXCL2</i>      | 0.821  | 3.00E-02 | <i>EXOSC5</i>    | -0.538 | 3.60E-02 |
| <i>H2AFY2</i>     | 0.413  | 3.01E-02 | <i>CIAO1</i>     | -0.468 | 3.61E-02 |
| <i>NUDCD3</i>     | -0.605 | 3.01E-02 | <i>TIMP2</i>     | 0.903  | 3.62E-02 |
| <i>MAP3K5</i>     | 0.996  | 3.02E-02 | <i>CD27</i>      | 0.645  | 3.62E-02 |
| <i>UNC13C</i>     | -0.496 | 3.02E-02 | <i>MMP7</i>      | 0.258  | 3.62E-02 |
| <i>KCTD12</i>     | 1.144  | 3.03E-02 | <i>SLC2A1</i>    | -0.365 | 3.62E-02 |
| <i>ATF5</i>       | 0.712  | 3.03E-02 | <i>NPHP1</i>     | -0.367 | 3.62E-02 |
| <i>DDIT4</i>      | 0.510  | 3.03E-02 | <i>BPHL</i>      | -0.410 | 3.62E-02 |
| <i>NUB1</i>       | 1.018  | 3.04E-02 | <i>B9D1</i>      | -0.468 | 3.62E-02 |
| <i>NBAS</i>       | -0.588 | 3.04E-02 | <i>ELL2</i>      | 0.650  | 3.63E-02 |
| <i>IL17B</i>      | -0.600 | 3.04E-02 | <i>PDZRN4</i>    | 0.305  | 3.63E-02 |
| <i>LRRC33</i>     | 0.772  | 3.05E-02 | <i>GTF3C2</i>    | -0.485 | 3.63E-02 |
| <i>ITM2C</i>      | 0.678  | 3.05E-02 | <i>F3</i>        | 0.533  | 3.64E-02 |
| <i>DDX25</i>      | -0.588 | 3.05E-02 | <i>F2RL2</i>     | 0.453  | 3.64E-02 |
| <i>LACTB</i>      | 1.502  | 3.06E-02 | <i>TMEM186</i>   | -0.468 | 3.64E-02 |
| <i>VAMP1</i>      | 0.587  | 3.06E-02 | <i>ZBTB8B</i>    | -0.497 | 3.64E-02 |
| <i>PITPNC1</i>    | 0.369  | 3.06E-02 | <i>MRPL43</i>    | -0.507 | 3.64E-02 |
| <i>RNF175</i>     | 0.248  | 3.06E-02 | <i>SLC31A2</i>   | 0.780  | 3.65E-02 |
| <i>ING5</i>       | -0.620 | 3.06E-02 | <i>TFPI</i>      | 0.603  | 3.65E-02 |
| <i>ABCC12</i>     | -0.649 | 3.06E-02 | <i>STS</i>       | 0.408  | 3.65E-02 |
| <i>PDK2</i>       | -0.701 | 3.06E-02 | <i>MSRA</i>      | 0.405  | 3.65E-02 |
| <i>LY96</i>       | 1.635  | 3.07E-02 | <i>AIFM3</i>     | -0.427 | 3.65E-02 |
| <i>PPP1R18</i>    | 1.617  | 3.07E-02 | <i>C6orf123</i>  | -0.473 | 3.65E-02 |
| <i>CSF1R</i>      | 1.450  | 3.07E-02 | <i>SLAMF7</i>    | 0.655  | 3.66E-02 |
| <i>PABPC5</i>     | -0.526 | 3.07E-02 | <i>EIF4E3</i>    | 0.593  | 3.66E-02 |
| <i>C1orf213</i>   | -0.649 | 3.07E-02 | <i>SCARA5</i>    | 0.510  | 3.66E-02 |
| <i>CAPN6</i>      | 0.737  | 3.08E-02 | <i>P2RY10</i>    | 0.503  | 3.66E-02 |
| <i>USP27X</i>     | -0.475 | 3.08E-02 | <i>SPRYD7</i>    | -0.400 | 3.66E-02 |
| <i>BSPRY</i>      | -0.571 | 3.08E-02 | <i>APTX</i>      | -0.483 | 3.66E-02 |
| <i>ALDH4A1</i>    | -0.623 | 3.08E-02 | <i>DUSP3</i>     | 0.645  | 3.67E-02 |
| <i>SCRN2</i>      | -0.710 | 3.08E-02 | <i>KCNJ2</i>     | 0.408  | 3.67E-02 |
| <i>C2orf15</i>    | -0.528 | 3.09E-02 | <i>HOXA7</i>     | 0.223  | 3.67E-02 |
| <i>CROT</i>       | -0.588 | 3.09E-02 | <i>LSM11</i>     | -0.350 | 3.67E-02 |
| <i>IFT81</i>      | -0.677 | 3.09E-02 | <i>DHPS</i>      | -0.513 | 3.67E-02 |
| <i>ALKBH7</i>     | -0.735 | 3.09E-02 | <i>PARP14</i>    | 0.823  | 3.68E-02 |
| <i>LGALS8-AS1</i> | -0.760 | 3.09E-02 | <i>COL12A1</i>   | 0.697  | 3.68E-02 |
| <i>PTAFR</i>      | 1.507  | 3.10E-02 | <i>CTLA4</i>     | 0.600  | 3.68E-02 |
| <i>PLEKHS1</i>    | 0.125  | 3.10E-02 | <i>ZBTB16</i>    | 0.345  | 3.68E-02 |
| <i>BCL2L14</i>    | 0.996  | 3.11E-02 | <i>CACNA2D3</i>  | 0.145  | 3.68E-02 |
| <i>CASP7</i>      | 0.955  | 3.11E-02 | <i>ZDHHC13</i>   | -0.465 | 3.68E-02 |
| <i>SIPR1</i>      | 0.895  | 3.11E-02 | <i>ZNF837</i>    | -0.517 | 3.69E-02 |
| <i>EC11</i>       | -0.707 | 3.11E-02 | <i>COQ3</i>      | -0.518 | 3.69E-02 |
| <i>SNX20</i>      | 0.871  | 3.12E-02 | <i>OMD</i>       | 0.575  | 3.70E-02 |
| <i>BATF3</i>      | 0.766  | 3.12E-02 | <i>SGIP1</i>     | 0.483  | 3.70E-02 |
| <i>FLJ34503</i>   | -0.499 | 3.12E-02 | <i>FAM107B</i>   | 0.450  | 3.70E-02 |
| <i>C1orf168</i>   | -0.511 | 3.12E-02 | <i>EAF2</i>      | 0.440  | 3.70E-02 |
| <i>VAPB</i>       | -0.513 | 3.12E-02 | <i>HBB</i>       | 0.318  | 3.70E-02 |
| <i>SRGAP3</i>     | -0.603 | 3.12E-02 | <i>OLFM4</i>     | 0.080  | 3.70E-02 |

|                  |        |          |                   |        |          |
|------------------|--------|----------|-------------------|--------|----------|
| <i>SLC25A17</i>  | -0.624 | 3.12E-02 | <i>SLCO6A1</i>    | -0.390 | 3.70E-02 |
| <i>PMM1</i>      | -0.659 | 3.12E-02 | <i>CASP1</i>      | 0.813  | 3.71E-02 |
| <i>PANK2</i>     | 0.785  | 3.13E-02 | <i>SPRED1</i>     | 0.740  | 3.71E-02 |
| <i>SFRP2</i>     | 0.627  | 3.13E-02 | <i>BACH2</i>      | 0.448  | 3.71E-02 |
| <i>PBX4</i>      | 0.475  | 3.13E-02 | <i>SP100</i>      | 0.738  | 3.72E-02 |
| <i>LINC00471</i> | -0.472 | 3.13E-02 | <i>PVRIG</i>      | 0.585  | 3.72E-02 |
| <i>MTHFSD</i>    | -0.528 | 3.13E-02 | <i>HGF</i>        | 0.488  | 3.72E-02 |
| <i>C17orf105</i> | -0.541 | 3.13E-02 | <i>SCN5A</i>      | -0.423 | 3.72E-02 |
| <i>SERPINA10</i> | -0.621 | 3.13E-02 | <i>COPS7B</i>     | -0.458 | 3.72E-02 |
| <i>RSG1</i>      | -0.632 | 3.13E-02 | <i>CELSR3</i>     | -0.470 | 3.72E-02 |
| <i>ABCB6</i>     | -0.535 | 3.14E-02 | <i>RILPL2</i>     | 0.567  | 3.73E-02 |
| <i>TNRC6C</i>    | -0.594 | 3.14E-02 | <i>CORO2B</i>     | 0.488  | 3.73E-02 |
| <i>COLQ</i>      | -0.632 | 3.14E-02 | <i>RNF125</i>     | 0.330  | 3.73E-02 |
| <i>NFKBIA</i>    | 1.014  | 3.15E-02 | <i>XK</i>         | -0.375 | 3.73E-02 |
| <i>FAM122C</i>   | 0.549  | 3.15E-02 | <i>MUTYH</i>      | -0.488 | 3.73E-02 |
| <i>PCED1A</i>    | -0.666 | 3.15E-02 | <i>NCDN</i>       | -0.493 | 3.73E-02 |
| <i>CD97</i>      | 1.256  | 3.16E-02 | <i>AKNA</i>       | 0.630  | 3.74E-02 |
| <i>TDRD7</i>     | 1.179  | 3.16E-02 | <i>ATP8B4</i>     | 0.538  | 3.74E-02 |
| <i>PILRA</i>     | 1.109  | 3.16E-02 | <i>EPHA4</i>      | 0.375  | 3.74E-02 |
| <i>FBXL13</i>    | 0.260  | 3.16E-02 | <i>AFAP1L1</i>    | 0.330  | 3.74E-02 |
| <i>ZNF250</i>    | -0.525 | 3.16E-02 | <i>LRP6</i>       | -0.468 | 3.74E-02 |
| <i>ANKRD54</i>   | -0.625 | 3.16E-02 | <i>OGFOD2</i>     | -0.523 | 3.74E-02 |
| <i>TRAFD1</i>    | 0.848  | 3.17E-02 | <i>NME1</i>       | -0.563 | 3.74E-02 |
| <i>RCN1</i>      | 0.729  | 3.17E-02 | <i>C3orf79</i>    | -0.327 | 3.75E-02 |
| <i>ID3</i>       | 0.463  | 3.17E-02 | <i>ECM1</i>       | 0.635  | 3.76E-02 |
| <i>RHBDL2</i>    | 0.449  | 3.17E-02 | <i>PARP6</i>      | -0.450 | 3.76E-02 |
| <i>GLI3</i>      | -0.605 | 3.17E-02 | <i>MIR22HG</i>    | 0.758  | 3.77E-02 |
| <i>PLEKHO1</i>   | 1.152  | 3.18E-02 | <i>PDGFC</i>      | 0.695  | 3.77E-02 |
| <i>PDCD1LG2</i>  | 1.073  | 3.18E-02 | <i>HCP5</i>       | 0.533  | 3.77E-02 |
| <i>GFOD1</i>     | 0.276  | 3.18E-02 | <i>EREG</i>       | 0.273  | 3.77E-02 |
| <i>BCAS1</i>     | -0.533 | 3.18E-02 | <i>ST6GALNAC1</i> | 0.133  | 3.77E-02 |
| <i>STXBP4</i>    | -0.569 | 3.18E-02 | <i>ST7L</i>       | -0.375 | 3.77E-02 |
| <i>LOC728537</i> | -0.581 | 3.18E-02 | <i>APOBEC3G</i>   | 0.633  | 3.78E-02 |
| <i>IGSF3</i>     | -0.515 | 3.19E-02 | <i>LPIN2</i>      | 0.533  | 3.78E-02 |
| <i>FLRT3</i>     | -0.516 | 3.19E-02 | <i>GHR</i>        | 0.483  | 3.78E-02 |
| <i>ZNF193</i>    | -0.526 | 3.19E-02 | <i>TMEM27</i>     | -0.357 | 3.78E-02 |
| <i>NKX3-2</i>    | -0.587 | 3.19E-02 | <i>TNS1</i>       | 0.813  | 3.79E-02 |
| <i>MKL2</i>      | -0.659 | 3.19E-02 | <i>SERPINA1</i>   | 0.633  | 3.79E-02 |
| <i>VAMP5</i>     | 1.226  | 3.20E-02 | <i>SCN4B</i>      | 0.387  | 3.79E-02 |
| <i>KMO</i>       | 0.665  | 3.20E-02 | <i>C3orf33</i>    | -0.393 | 3.79E-02 |
| <i>HAS2</i>      | 0.587  | 3.20E-02 | <i>MAPK8</i>      | -0.445 | 3.79E-02 |
| <i>FNDC1</i>     | 0.593  | 3.21E-02 | <i>NBL1</i>       | 0.595  | 3.80E-02 |
| <i>KRT222</i>    | -0.472 | 3.21E-02 | <i>ZNF786</i>     | -0.420 | 3.80E-02 |
| <i>RAB3IP</i>    | -0.571 | 3.21E-02 | <i>CEP70</i>      | -0.470 | 3.80E-02 |
| <i>ARID2</i>     | -0.751 | 3.21E-02 | <i>ITGA2B</i>     | -0.503 | 3.80E-02 |
| <i>LST1</i>      | 1.647  | 3.22E-02 | <i>EDNRA</i>      | 0.615  | 3.81E-02 |
| <i>TMEM30B</i>   | -0.561 | 3.22E-02 | <i>TBC1D2</i>     | 0.590  | 3.81E-02 |
| <i>ZNF263</i>    | -0.596 | 3.22E-02 | <i>RAB37</i>      | 0.410  | 3.81E-02 |
| <i>OR2W1</i>     | -0.596 | 3.22E-02 | <i>PRKRIP1</i>    | -0.440 | 3.81E-02 |
| <i>LINC00612</i> | -0.663 | 3.22E-02 | <i>LRAT</i>       | -0.333 | 3.82E-02 |
| <i>NECAP2</i>    | 1.448  | 3.23E-02 | <i>RNF41</i>      | -0.400 | 3.82E-02 |



|                  |        |          |                     |        |          |
|------------------|--------|----------|---------------------|--------|----------|
| <i>C9orf117</i>  | -0.653 | 3.23E-02 | <i>CTU2</i>         | -0.520 | 3.82E-02 |
| <i>SVOPL</i>     | 0.188  | 3.24E-02 | <i>TRPV2</i>        | 0.683  | 3.83E-02 |
| <i>PIGM</i>      | -0.619 | 3.24E-02 | <i>AGTR1</i>        | 0.525  | 3.83E-02 |
| <i>JAK2</i>      | 1.523  | 3.25E-02 | <i>KIAA1199</i>     | 0.398  | 3.83E-02 |
| <i>CSRP2</i>     | 0.429  | 3.25E-02 | <i>STEAP2</i>       | 0.360  | 3.83E-02 |
| <i>TLL1</i>      | -0.509 | 3.25E-02 | <i>PMCHL1</i>       | -0.357 | 3.83E-02 |
| <i>EXOC6</i>     | -0.615 | 3.25E-02 | <i>ALCAM</i>        | 0.473  | 3.84E-02 |
| <i>PLXNC1</i>    | 0.835  | 3.26E-02 | <i>ATXN1L</i>       | 0.467  | 3.84E-02 |
| <i>NME8</i>      | 0.524  | 3.26E-02 | <i>CNTN3</i>        | 0.327  | 3.84E-02 |
| <i>XPNPEP3</i>   | -0.482 | 3.26E-02 | <i>KCTD6</i>        | -0.410 | 3.84E-02 |
| <i>CABS1</i>     | -0.516 | 3.26E-02 | <i>EME1</i>         | -0.487 | 3.84E-02 |
| <i>LILRA4</i>    | 0.976  | 3.27E-02 | <i>PIGQ</i>         | -0.523 | 3.84E-02 |
| <i>C12orf66</i>  | -0.608 | 3.27E-02 | <i>POLR2F</i>       | -0.533 | 3.84E-02 |
| <i>ITFG3</i>     | -0.691 | 3.27E-02 | <i>TRIM22</i>       | 0.903  | 3.85E-02 |
| <i>ZMYND10</i>   | -0.719 | 3.27E-02 | <i>TPK1</i>         | 0.553  | 3.85E-02 |
| <i>PTPRE</i>     | 1.211  | 3.28E-02 | <i>CXorf65</i>      | 0.427  | 3.85E-02 |
| <i>ARHGDI1</i>   | 1.179  | 3.28E-02 | <i>KAL1</i>         | 0.355  | 3.85E-02 |
| <i>FYN</i>       | 0.977  | 3.28E-02 | <i>TMEM30B</i>      | -0.403 | 3.85E-02 |
| <i>SIK1</i>      | 0.612  | 3.28E-02 | <i>MAGEH1</i>       | 0.558  | 3.86E-02 |
| <i>RGCC</i>      | 0.511  | 3.28E-02 | <i>UGT2B28</i>      | 0.155  | 3.86E-02 |
| <i>APLF</i>      | 0.438  | 3.28E-02 | <i>FAM201A</i>      | -0.343 | 3.86E-02 |
| <i>IRF2</i>      | 1.230  | 3.29E-02 | <i>MYO10</i>        | -0.368 | 3.86E-02 |
| <i>DIS3L2</i>    | -0.529 | 3.29E-02 | <i>ZNF285</i>       | -0.390 | 3.86E-02 |
| <i>SLC5A8</i>    | -0.649 | 3.29E-02 | <i>C17orf101</i>    | -0.433 | 3.86E-02 |
| <i>DHRS9</i>     | 0.642  | 3.30E-02 | <i>JMJD4</i>        | -0.500 | 3.86E-02 |
| <i>HAMP</i>      | 0.629  | 3.30E-02 | <i>NDUFA7</i>       | -0.528 | 3.86E-02 |
| <i>SHROOM3</i>   | -0.497 | 3.30E-02 | <i>TPM1</i>         | 0.590  | 3.87E-02 |
| <i>FASLG</i>     | 1.182  | 3.31E-02 | <i>FAM133A</i>      | 0.187  | 3.87E-02 |
| <i>CHI3L2</i>    | 0.449  | 3.31E-02 | <i>ANKRD45</i>      | -0.310 | 3.87E-02 |
| <i>ARL11</i>     | 0.359  | 3.31E-02 | <i>POLR1A</i>       | -0.443 | 3.87E-02 |
| <i>MT1F</i>      | 0.347  | 3.31E-02 | <i>EPT1</i>         | -0.517 | 3.87E-02 |
| <i>C11orf95</i>  | -0.586 | 3.31E-02 | <i>PRC1</i>         | -0.533 | 3.87E-02 |
| <i>CD14</i>      | 1.376  | 3.32E-02 | <i>APLNR</i>        | 0.738  | 3.88E-02 |
| <i>SERPIN1</i>   | 1.217  | 3.32E-02 | <i>RSAD2</i>        | 0.538  | 3.88E-02 |
| <i>RHEBL1</i>    | 0.448  | 3.32E-02 | <i>THSD7A</i>       | 0.415  | 3.88E-02 |
| <i>SLC14A1</i>   | -0.456 | 3.32E-02 | <i>PRG4</i>         | 0.275  | 3.88E-02 |
| <i>CNGA4</i>     | -0.531 | 3.32E-02 | <i>LOC100129726</i> | -0.483 | 3.88E-02 |
| <i>DAND5</i>     | -0.628 | 3.32E-02 | <i>PTTG1</i>        | -0.523 | 3.88E-02 |
| <i>DDAH2</i>     | -0.630 | 3.32E-02 | <i>IGFLR1</i>       | 0.578  | 3.89E-02 |
| <i>ARSB</i>      | 0.794  | 3.34E-02 | <i>LHFPL1</i>       | -0.353 | 3.89E-02 |
| <i>ZNF280B</i>   | 0.569  | 3.34E-02 | <i>LOC647946</i>    | -0.357 | 3.89E-02 |
| <i>ANKRD52</i>   | -0.576 | 3.34E-02 | <i>A1BG</i>         | -0.453 | 3.89E-02 |
| <i>ADAMTS1</i>   | 0.681  | 3.35E-02 | <i>CCDC167</i>      | -0.477 | 3.89E-02 |
| <i>RNF113A</i>   | 0.665  | 3.35E-02 | <i>ACSL1</i>        | 0.633  | 3.90E-02 |
| <i>FLT1</i>      | 0.492  | 3.35E-02 | <i>IRAK3</i>        | 0.585  | 3.90E-02 |
| <i>LOC158572</i> | -0.509 | 3.35E-02 | <i>CLDN11</i>       | 0.475  | 3.90E-02 |
| <i>LINC00085</i> | -0.584 | 3.35E-02 | <i>CCBE1</i>        | 0.373  | 3.90E-02 |
| <i>CHRM4</i>     | -0.605 | 3.35E-02 | <i>NOG</i>          | 0.103  | 3.90E-02 |
| <i>GLRX</i>      | 1.063  | 3.36E-02 | <i>NLGN4Y</i>       | -0.338 | 3.90E-02 |
| <i>DEPTOR</i>    | -0.523 | 3.36E-02 | <i>WBP1L</i>        | 0.795  | 3.91E-02 |
| <i>FAM170A</i>   | -0.611 | 3.36E-02 | <i>ITPRI</i>        | 0.543  | 3.91E-02 |

|                   |        |          |                  |        |          |
|-------------------|--------|----------|------------------|--------|----------|
| <i>TMEM121</i>    | -0.640 | 3.36E-02 | <i>CLIC5</i>     | 0.450  | 3.91E-02 |
| <i>EIF2B4</i>     | -0.687 | 3.36E-02 | <i>MGC57346</i>  | -0.370 | 3.91E-02 |
| <i>GPX1</i>       | 0.778  | 3.37E-02 | <i>NMNAT1</i>    | -0.390 | 3.91E-02 |
| <i>UBE2E2</i>     | 0.639  | 3.37E-02 | <i>GOLGA7B</i>   | -0.527 | 3.91E-02 |
| <i>LOC255411</i>  | -0.562 | 3.37E-02 | <i>ORC1</i>      | -0.533 | 3.91E-02 |
| <i>TMEM80</i>     | -0.610 | 3.37E-02 | <i>CTSO</i>      | 0.920  | 3.92E-02 |
| <i>ATP5SL</i>     | -0.655 | 3.37E-02 | <i>PTPRB</i>     | 0.633  | 3.92E-02 |
| <i>OTUD7A</i>     | -0.660 | 3.37E-02 | <i>HTRA3</i>     | 0.613  | 3.92E-02 |
| <i>FGF12</i>      | -0.514 | 3.38E-02 | <i>HLX</i>       | 0.585  | 3.92E-02 |
| <i>PGAP3</i>      | -0.656 | 3.38E-02 | <i>HS3ST3A1</i>  | 0.275  | 3.92E-02 |
| <i>ATP6V1B2</i>   | 1.490  | 3.39E-02 | <i>S100A7</i>    | 0.160  | 3.92E-02 |
| <i>N4BP1</i>      | 0.975  | 3.39E-02 | <i>DCUN1D2</i>   | -0.410 | 3.92E-02 |
| <i>METT121A</i>   | 0.633  | 3.39E-02 | <i>FKBP15</i>    | 0.695  | 3.93E-02 |
| <i>TNFRSF21</i>   | 0.503  | 3.39E-02 | <i>TPM4</i>      | 0.633  | 3.93E-02 |
| <i>DTX4</i>       | 0.366  | 3.39E-02 | <i>ALPK2</i>     | 0.357  | 3.93E-02 |
| <i>C1orf87</i>    | -0.571 | 3.39E-02 | <i>ATP10A</i>    | 0.318  | 3.93E-02 |
| <i>FLVCR1-AS1</i> | -0.473 | 3.40E-02 | <i>GPR174</i>    | 0.260  | 3.93E-02 |
| <i>OLFM2</i>      | -0.561 | 3.40E-02 | <i>MUC15</i>     | 0.167  | 3.93E-02 |
| <i>TAF6</i>       | -0.619 | 3.40E-02 | <i>BFSP1</i>     | -0.333 | 3.93E-02 |
| <i>ZNF837</i>     | -0.717 | 3.41E-02 | <i>ITLN1</i>     | -0.367 | 3.93E-02 |
| <i>HMHA1</i>      | 1.210  | 3.42E-02 | <i>GOT1</i>      | -0.448 | 3.93E-02 |
| <i>CX3CL1</i>     | 0.825  | 3.42E-02 | <i>ISLR</i>      | 0.690  | 3.94E-02 |
| <i>LOC339803</i>  | 0.422  | 3.42E-02 | <i>TMEM176A</i>  | 0.550  | 3.94E-02 |
| <i>ZC3H3</i>      | -0.649 | 3.42E-02 | <i>FAM5C</i>     | 0.093  | 3.94E-02 |
| <i>MFSD10</i>     | -0.695 | 3.42E-02 | <i>GZMB</i>      | 0.500  | 3.95E-02 |
| <i>EML4</i>       | 0.954  | 3.43E-02 | <i>C14orf182</i> | -0.350 | 3.95E-02 |
| <i>ABHD14B</i>    | -0.697 | 3.43E-02 | <i>REXO1</i>     | -0.510 | 3.95E-02 |
| <i>WDFY1</i>      | 1.159  | 3.44E-02 | <i>LRRC15</i>    | 0.608  | 3.96E-02 |
| <i>RCAN3</i>      | -0.438 | 3.44E-02 | <i>PLCXD2</i>    | 0.233  | 3.96E-02 |
| <i>ANO1</i>       | -0.444 | 3.44E-02 | <i>RP9P</i>      | -0.337 | 3.96E-02 |
| <i>H2AFJ</i>      | -0.512 | 3.44E-02 | <i>RASEF</i>     | -0.347 | 3.96E-02 |
| <i>RAB32</i>      | 0.864  | 3.45E-02 | <i>PPME1</i>     | -0.405 | 3.96E-02 |
| <i>TMC5</i>       | -0.503 | 3.45E-02 | <i>ZNF137P</i>   | -0.463 | 3.96E-02 |
| <i>ZMAT1</i>      | -0.697 | 3.45E-02 | <i>CHAF1B</i>    | -0.508 | 3.96E-02 |
| <i>DSE</i>        | 1.496  | 3.46E-02 | <i>DPY30</i>     | -0.527 | 3.96E-02 |
| <i>MSR1</i>       | 0.949  | 3.46E-02 | <i>PIK3R5</i>    | 0.790  | 3.97E-02 |
| <i>CCDC96</i>     | -0.530 | 3.46E-02 | <i>NID1</i>      | 0.653  | 3.97E-02 |
| <i>FAM173A</i>    | -0.745 | 3.46E-02 | <i>MCAM</i>      | 0.613  | 3.97E-02 |
| <i>DUSP10</i>     | 0.576  | 3.47E-02 | <i>STAP1</i>     | 0.370  | 3.97E-02 |
| <i>LRRC8D</i>     | 0.521  | 3.47E-02 | <i>PNMA2</i>     | 0.318  | 3.97E-02 |
| <i>PTCHD1</i>     | 0.391  | 3.47E-02 | <i>ZC3HAV1L</i>  | -0.330 | 3.97E-02 |
| <i>SDR16C5</i>    | -0.470 | 3.47E-02 | <i>CHKA</i>      | -0.380 | 3.97E-02 |
| <i>NXNL2</i>      | -0.473 | 3.47E-02 | <i>C1orf213</i>  | -0.457 | 3.97E-02 |
| <i>OSBPL1A</i>    | -0.567 | 3.47E-02 | <i>BATF2</i>     | 0.483  | 3.98E-02 |
| <i>SERPINF1</i>   | 0.766  | 3.48E-02 | <i>SF3A2</i>     | -0.513 | 3.98E-02 |
| <i>GCNT2</i>      | 0.350  | 3.48E-02 | <i>GEM</i>       | 0.618  | 3.99E-02 |
| <i>LYSMD4</i>     | 0.339  | 3.48E-02 | <i>FAM13C</i>    | 0.410  | 3.99E-02 |
| <i>SIT1</i>       | 1.292  | 3.49E-02 | <i>CYS1</i>      | 0.407  | 3.99E-02 |
| <i>KCNJ2</i>      | 0.541  | 3.49E-02 | <i>NGFR</i>      | 0.398  | 3.99E-02 |
| <i>SH2D1B</i>     | 0.336  | 3.49E-02 | <i>OLFM2</i>     | -0.403 | 3.99E-02 |
| <i>XKRX</i>       | -0.458 | 3.49E-02 | <i>CAPS</i>      | -0.530 | 3.99E-02 |

|                  |        |          |                  |        |          |
|------------------|--------|----------|------------------|--------|----------|
| <i>ATP1B2</i>    | -0.698 | 3.49E-02 | <i>PARVG</i>     | 0.703  | 4.00E-02 |
| <i>CD4</i>       | 1.362  | 3.50E-02 | <i>TNFAIP8L2</i> | 0.660  | 4.00E-02 |
| <i>RNF19B</i>    | 1.063  | 3.50E-02 | <i>SCIN</i>      | 0.170  | 4.00E-02 |
| <i>KIF21B</i>    | 0.696  | 3.50E-02 | <i>SLC17A8</i>   | -0.357 | 4.00E-02 |
| <i>DISC1</i>     | 0.484  | 3.50E-02 | <i>ENY2</i>      | -0.483 | 4.00E-02 |
| <i>LGALS3BP</i>  | 1.060  | 3.51E-02 | <i>ANXA11</i>    | 0.695  | 4.01E-02 |
| <i>GM2A</i>      | 0.966  | 3.51E-02 | <i>PARD6G</i>    | -0.370 | 4.01E-02 |
| <i>GYPC</i>      | 0.878  | 3.51E-02 | <i>ABCB6</i>     | -0.383 | 4.01E-02 |
| <i>COX8C</i>     | -0.484 | 3.52E-02 | <i>DIRAS1</i>    | -0.460 | 4.01E-02 |
| <i>ZC3H10</i>    | -0.498 | 3.52E-02 | <i>SP110</i>     | 0.738  | 4.02E-02 |
| <i>MCF2L</i>     | -0.621 | 3.52E-02 | <i>ADH1C</i>     | 0.293  | 4.02E-02 |
| <i>CYP7B1</i>    | 0.415  | 3.53E-02 | <i>SHISA2</i>    | 0.123  | 4.02E-02 |
| <i>DACH1</i>     | -0.473 | 3.53E-02 | <i>DECR2</i>     | -0.440 | 4.02E-02 |
| <i>H1FO</i>      | -0.479 | 3.53E-02 | <i>FOS</i>       | 0.438  | 4.03E-02 |
| <i>DCAKD</i>     | -0.519 | 3.53E-02 | <i>ANKRD22</i>   | 0.427  | 4.03E-02 |
| <i>SV2A</i>      | -0.551 | 3.53E-02 | <i>C19orf12</i>  | 0.303  | 4.03E-02 |
| <i>C16orf74</i>  | -0.580 | 3.53E-02 | <i>APCDD1</i>    | 0.303  | 4.03E-02 |
| <i>C1orf172</i>  | -0.634 | 3.53E-02 | <i>SPATS1</i>    | -0.420 | 4.03E-02 |
| <i>FGFR4</i>     | -0.668 | 3.53E-02 | <i>PTDSS2</i>    | -0.478 | 4.03E-02 |
| <i>TRIM3</i>     | -0.711 | 3.53E-02 | <i>KDM1A</i>     | -0.490 | 4.03E-02 |
| <i>YBX1</i>      | 0.943  | 3.54E-02 | <i>OBSCN</i>     | -0.517 | 4.03E-02 |
| <i>PNPLA4</i>    | -0.546 | 3.54E-02 | <i>RPS6KA2</i>   | 0.613  | 4.04E-02 |
| <i>NRTN</i>      | -0.569 | 3.54E-02 | <i>NINJ2</i>     | 0.303  | 4.04E-02 |
| <i>CCDC159</i>   | -0.658 | 3.54E-02 | <i>CUTA</i>      | -0.503 | 4.05E-02 |
| <i>HSD17B3</i>   | -0.513 | 3.55E-02 | <i>SIGLEC10</i>  | 0.590  | 4.06E-02 |
| <i>FOXD2</i>     | -0.554 | 3.55E-02 | <i>AGPAT4</i>    | 0.373  | 4.06E-02 |
| <i>C1orf53</i>   | -0.603 | 3.55E-02 | <i>FAM71E1</i>   | -0.467 | 4.06E-02 |
| <i>CLEC4E</i>    | 0.887  | 3.56E-02 | <i>XKRX</i>      | -0.333 | 4.07E-02 |
| <i>RHOF</i>      | 0.745  | 3.56E-02 | <i>CNNM4</i>     | -0.348 | 4.07E-02 |
| <i>CCDC89</i>    | 0.194  | 3.56E-02 | <i>LOC152217</i> | -0.487 | 4.07E-02 |
| <i>C3orf79</i>   | -0.443 | 3.56E-02 | <i>FERMT2</i>    | 0.730  | 4.08E-02 |
| <i>LINC00339</i> | -0.508 | 3.56E-02 | <i>WDFY4</i>     | 0.673  | 4.08E-02 |
| <i>FCN1</i>      | 1.104  | 3.57E-02 | <i>RASSF2</i>    | 0.625  | 4.08E-02 |
| <i>DEF6</i>      | 1.038  | 3.57E-02 | <i>SLC40A1</i>   | 0.623  | 4.08E-02 |
| <i>KIAA0922</i>  | 0.561  | 3.57E-02 | <i>CPE</i>       | 0.565  | 4.08E-02 |
| <i>ART3</i>      | 0.241  | 3.57E-02 | <i>NXN</i>       | 0.365  | 4.08E-02 |
| <i>ZNF311</i>    | -0.442 | 3.57E-02 | <i>TNPO3</i>     | -0.445 | 4.08E-02 |
| <i>RARRES2</i>   | 0.793  | 3.58E-02 | <i>MED27</i>     | -0.465 | 4.08E-02 |
| <i>SIRPB2</i>    | 0.687  | 3.58E-02 | <i>BTN3A2</i>    | 0.693  | 4.09E-02 |
| <i>PCOLCE2</i>   | 0.312  | 3.58E-02 | <i>ADAMTS5</i>   | 0.520  | 4.09E-02 |
| <i>MARK4</i>     | -0.642 | 3.58E-02 | <i>ACO1</i>      | 0.510  | 4.09E-02 |
| <i>TEF</i>       | -0.644 | 3.58E-02 | <i>COMP</i>      | 0.475  | 4.09E-02 |
| <i>C12orf52</i>  | -0.705 | 3.58E-02 | <i>SLC25A14</i>  | -0.395 | 4.09E-02 |
| <i>BIN1</i>      | 0.718  | 3.59E-02 | <i>PAX9</i>      | -0.400 | 4.09E-02 |
| <i>CDC42BPA</i>  | -0.586 | 3.60E-02 | <i>SAPCD2</i>    | -0.527 | 4.09E-02 |
| <i>SGPP1</i>     | 1.096  | 3.61E-02 | <i>C1orf53</i>   | -0.437 | 4.10E-02 |
| <i>DDX26B</i>    | 0.893  | 3.61E-02 | <i>C9orf47</i>   | -0.450 | 4.10E-02 |
| <i>RRAS2</i>     | 0.550  | 3.61E-02 | <i>SNX9</i>      | 0.613  | 4.11E-02 |
| <i>MTA3</i>      | -0.523 | 3.61E-02 | <i>GFII</i>      | 0.410  | 4.11E-02 |
| <i>EFHD2</i>     | 1.406  | 3.62E-02 | <i>CPNE5</i>     | 0.347  | 4.11E-02 |
| <i>ADAM19</i>    | 0.880  | 3.62E-02 | <i>LIPG</i>      | 0.215  | 4.11E-02 |

|                  |        |          |                  |        |          |
|------------------|--------|----------|------------------|--------|----------|
| <i>BATF</i>      | 0.871  | 3.62E-02 | <i>ZNF677</i>    | 0.190  | 4.11E-02 |
| <i>MARC1</i>     | -0.517 | 3.62E-02 | <i>THNSL2</i>    | -0.388 | 4.11E-02 |
| <i>FAM63A</i>    | -0.617 | 3.62E-02 | <i>MARK4</i>     | -0.465 | 4.11E-02 |
| <i>C1orf64</i>   | -0.654 | 3.62E-02 | <i>ANKRD26</i>   | -0.485 | 4.11E-02 |
| <i>TRIM38</i>    | 1.390  | 3.63E-02 | <i>LCK</i>       | 0.593  | 4.12E-02 |
| <i>FAM117A</i>   | 0.593  | 3.63E-02 | <i>TIFAB</i>     | 0.573  | 4.12E-02 |
| <i>KIAA1383</i>  | -0.468 | 3.63E-02 | <i>C4orf32</i>   | 0.427  | 4.13E-02 |
| <i>EDEM1</i>     | 0.872  | 3.64E-02 | <i>SLC43A1</i>   | 0.338  | 4.13E-02 |
| <i>PPP1R14A</i>  | -0.535 | 3.64E-02 | <i>HOXB7</i>     | 0.128  | 4.13E-02 |
| <i>TCAMIP</i>    | 0.198  | 3.65E-02 | <i>DPM3</i>      | -0.520 | 4.13E-02 |
| <i>AGAP11</i>    | -0.467 | 3.65E-02 | <i>STARD8</i>    | 0.580  | 4.14E-02 |
| <i>FAM110B</i>   | -0.531 | 3.65E-02 | <i>MYO1B</i>     | 0.570  | 4.14E-02 |
| <i>ATF7IP2</i>   | 0.557  | 3.66E-02 | <i>SLIT2</i>     | 0.540  | 4.14E-02 |
| <i>PPAPDC1A</i>  | 0.448  | 3.66E-02 | <i>CYTL1</i>     | 0.245  | 4.14E-02 |
| <i>TFPI2</i>     | 0.428  | 3.66E-02 | <i>RAB38</i>     | 0.195  | 4.14E-02 |
| <i>TNNC1</i>     | -0.452 | 3.66E-02 | <i>KCNQ5</i>     | -0.317 | 4.14E-02 |
| <i>MCF2L-AS1</i> | -0.535 | 3.66E-02 | <i>ZNF354C</i>   | -0.327 | 4.14E-02 |
| <i>CHAD</i>      | -0.601 | 3.66E-02 | <i>CCDC121</i>   | -0.430 | 4.14E-02 |
| <i>IFI35</i>     | 1.474  | 3.67E-02 | <i>MOV10L1</i>   | -0.443 | 4.14E-02 |
| <i>FOXO1</i>     | 0.681  | 3.67E-02 | <i>HCN3</i>      | -0.467 | 4.14E-02 |
| <i>DDIT4L</i>    | -0.460 | 3.67E-02 | <i>ADAD2</i>     | -0.547 | 4.14E-02 |
| <i>LCE1E</i>     | -0.598 | 3.67E-02 | <i>DNASE1L3</i>  | 0.345  | 4.15E-02 |
| <i>HPN</i>       | -0.614 | 3.67E-02 | <i>NOSTRIN</i>   | 0.333  | 4.15E-02 |
| <i>PTGER2</i>    | 0.452  | 3.68E-02 | <i>C1orf220</i>  | -0.403 | 4.15E-02 |
| <i>ATP7B</i>     | -0.558 | 3.68E-02 | <i>CHTF18</i>    | -0.547 | 4.15E-02 |
| <i>SH3BP5</i>    | 0.624  | 3.69E-02 | <i>PTPRG</i>     | 0.453  | 4.16E-02 |
| <i>STARD13</i>   | -0.578 | 3.69E-02 | <i>EPN2</i>      | -0.380 | 4.16E-02 |
| <i>R3HDML</i>    | -0.638 | 3.69E-02 | <i>CACNB2</i>    | -0.418 | 4.16E-02 |
| <i>DGAT1</i>     | -0.687 | 3.69E-02 | <i>MTERFD1</i>   | -0.553 | 4.16E-02 |
| <i>BST1</i>      | 0.636  | 3.70E-02 | <i>CALHM2</i>    | 0.688  | 4.17E-02 |
| <i>ABCA1IP</i>   | -0.563 | 3.70E-02 | <i>EPHA7</i>     | -0.363 | 4.17E-02 |
| <i>COL15A1</i>   | 0.723  | 3.71E-02 | <i>GRIK1-AS1</i> | -0.387 | 4.17E-02 |
| <i>RUSC2</i>     | -0.706 | 3.71E-02 | <i>LDB1</i>      | -0.438 | 4.17E-02 |
| <i>MBP</i>       | 0.480  | 3.72E-02 | <i>C14orf149</i> | 0.413  | 4.18E-02 |
| <i>SLC9B2</i>    | 0.435  | 3.72E-02 | <i>ENPEP</i>     | 0.248  | 4.18E-02 |
| <i>KIR3DL3</i>   | 0.410  | 3.72E-02 | <i>IL13RA2</i>   | 0.230  | 4.18E-02 |
| <i>LOC84856</i>  | 0.362  | 3.72E-02 | <i>PPP2R2D</i>   | -0.353 | 4.18E-02 |
| <i>RAB38</i>     | 0.296  | 3.72E-02 | <i>ADIPOR1</i>   | -0.423 | 4.18E-02 |
| <i>CCDC153</i>   | -0.604 | 3.72E-02 | <i>NDUFB9</i>    | -0.493 | 4.18E-02 |
| <i>AARS2</i>     | -0.645 | 3.72E-02 | <i>IFNAR2</i>    | 0.433  | 4.19E-02 |
| <i>C10orf54</i>  | 1.545  | 3.73E-02 | <i>FAM124B</i>   | 0.415  | 4.19E-02 |
| <i>MYD88</i>     | 1.249  | 3.73E-02 | <i>RAP1GAP2</i>  | -0.328 | 4.19E-02 |
| <i>RUNX1-IT1</i> | 0.651  | 3.73E-02 | <i>RFC3</i>      | -0.550 | 4.19E-02 |
| <i>AGMAT</i>     | 0.424  | 3.73E-02 | <i>BPNT1</i>     | -0.417 | 4.20E-02 |
| <i>TMPRSS3</i>   | 0.278  | 3.73E-02 | <i>THAP7</i>     | -0.498 | 4.20E-02 |
| <i>HOXB6</i>     | -0.393 | 3.73E-02 | <i>CYR61</i>     | 0.643  | 4.21E-02 |
| <i>DOCK1</i>     | -0.581 | 3.73E-02 | <i>LRCH2</i>     | 0.487  | 4.21E-02 |
| <i>CCDC121</i>   | -0.590 | 3.73E-02 | <i>ARFIP2</i>    | -0.450 | 4.21E-02 |
| <i>TSPY26P</i>   | -0.609 | 3.73E-02 | <i>NAAA</i>      | 0.405  | 4.22E-02 |
| <i>CCNYL1</i>    | 1.057  | 3.74E-02 | <i>SCN3A</i>     | 0.243  | 4.22E-02 |
| <i>SH2D4A</i>    | -0.471 | 3.74E-02 | <i>C15orf41</i>  | -0.380 | 4.22E-02 |

|                  |        |          |                |        |          |
|------------------|--------|----------|----------------|--------|----------|
| <i>ACAD10</i>    | -0.642 | 3.74E-02 | <i>PTPN7</i>   | 0.580  | 4.23E-02 |
| <i>FGR</i>       | 1.337  | 3.75E-02 | <i>MTUS1</i>   | 0.495  | 4.23E-02 |
| <i>STX11</i>     | 1.062  | 3.75E-02 | <i>LGALS2</i>  | 0.413  | 4.23E-02 |
| <i>EPHB2</i>     | 0.817  | 3.75E-02 | <i>LAX1</i>    | 0.408  | 4.23E-02 |
| <i>PSAT1</i>     | 0.545  | 3.75E-02 | <i>MFHAS1</i>  | 0.300  | 4.23E-02 |
| <i>CYBA</i>      | 1.235  | 3.76E-02 | <i>IFT172</i>  | -0.413 | 4.23E-02 |
| <i>CHST7</i>     | 0.383  | 3.76E-02 | <i>MRGPRF</i>  | 0.573  | 4.24E-02 |
| <i>CGN</i>       | -0.583 | 3.76E-02 | <i>TREX2</i>   | -0.465 | 4.24E-02 |
| <i>CD84</i>      | 1.227  | 3.77E-02 | <i>LPAR2</i>   | -0.470 | 4.24E-02 |
| <i>C12orf50</i>  | 0.189  | 3.77E-02 | <i>CEBPA</i>   | 0.438  | 4.25E-02 |
| <i>DCDC2</i>     | -0.454 | 3.78E-02 | <i>TSPAN2</i>  | 0.350  | 4.25E-02 |
| <i>CD3E</i>      | 1.207  | 3.79E-02 | <i>OR51B2</i>  | -0.490 | 4.25E-02 |
| <i>C5AR1</i>     | 0.915  | 3.79E-02 | <i>LTBP2</i>   | 0.860  | 4.26E-02 |
| <i>NDRG3</i>     | -0.552 | 3.79E-02 | <i>SYNPO2</i>  | 0.637  | 4.26E-02 |
| <i>ZNF84</i>     | -0.744 | 3.79E-02 | <i>ZNF516</i>  | -0.415 | 4.26E-02 |
| <i>LRRC2</i>     | 0.282  | 3.80E-02 | <i>RRNAD1</i>  | -0.483 | 4.26E-02 |
| <i>GCA</i>       | 1.107  | 3.81E-02 | <i>HPSE</i>    | 0.383  | 4.27E-02 |
| <i>FAIM3</i>     | 0.810  | 3.81E-02 | <i>PDE4DIP</i> | 0.265  | 4.27E-02 |
| <i>GAS1</i>      | 0.686  | 3.81E-02 | <i>VPRBP</i>   | -0.423 | 4.27E-02 |
| <i>MAP7</i>      | -0.533 | 3.81E-02 | <i>CYHR1</i>   | -0.510 | 4.27E-02 |
| <i>SLC25A43</i>  | 0.838  | 3.82E-02 | <i>SIRPG</i>   | 0.498  | 4.28E-02 |
| <i>ERMN</i>      | 0.272  | 3.82E-02 | <i>CDR1</i>    | 0.165  | 4.28E-02 |
| <i>PECAM1</i>    | 1.122  | 3.83E-02 | <i>KAT2A</i>   | -0.480 | 4.28E-02 |
| <i>ANKFY1</i>    | 0.919  | 3.83E-02 | <i>CHCHD6</i>  | -0.480 | 4.28E-02 |
| <i>CD180</i>     | 0.861  | 3.83E-02 | <i>EPHB2</i>   | 0.560  | 4.29E-02 |
| <i>IGFBP3</i>    | 0.593  | 3.83E-02 | <i>RARRES1</i> | 0.348  | 4.29E-02 |
| <i>KIAA1328</i>  | -0.454 | 3.83E-02 | <i>RASSF6</i>  | 0.177  | 4.29E-02 |
| <i>TRAF3IP2</i>  | -0.476 | 3.83E-02 | <i>SEMA3C</i>  | 0.605  | 4.30E-02 |
| <i>ATPBD4</i>    | -0.626 | 3.83E-02 | <i>IL6</i>     | 0.530  | 4.30E-02 |
| <i>GRIN2C</i>    | -0.629 | 3.83E-02 | <i>PFKFB3</i>  | 0.448  | 4.30E-02 |
| <i>LPCAT2</i>    | 0.885  | 3.84E-02 | <i>GRK4</i>    | -0.393 | 4.30E-02 |
| <i>LINC00341</i> | 0.601  | 3.84E-02 | <i>UBXN2A</i>  | -0.403 | 4.30E-02 |
| <i>PP7080</i>    | -0.547 | 3.85E-02 | <i>S100A4</i>  | 0.635  | 4.31E-02 |
| <i>SFXN4</i>     | -0.673 | 3.85E-02 | <i>TCEAL7</i>  | 0.397  | 4.31E-02 |
| <i>PTPN6</i>     | 1.170  | 3.86E-02 | <i>C1orf74</i> | -0.373 | 4.31E-02 |
| <i>SLC6A6</i>    | 0.604  | 3.86E-02 | <i>KIF20A</i>  | -0.515 | 4.31E-02 |
| <i>VPS37C</i>    | -0.548 | 3.86E-02 | <i>LOXL1</i>   | 0.565  | 4.32E-02 |
| <i>TBX21</i>     | 0.825  | 3.87E-02 | <i>TMEM204</i> | 0.493  | 4.32E-02 |
| <i>RBM24</i>     | -0.494 | 3.87E-02 | <i>UBE2E3</i>  | 0.435  | 4.32E-02 |
| <i>NCDN</i>      | -0.665 | 3.87E-02 | <i>AIM1</i>    | 0.398  | 4.32E-02 |
| <i>TNFRSF11A</i> | 0.281  | 3.88E-02 | <i>FILIP1</i>  | 0.310  | 4.32E-02 |
| <i>AGPAT6</i>    | -0.501 | 3.88E-02 | <i>NUAK2</i>   | 0.268  | 4.32E-02 |
| <i>LIN7B</i>     | -0.596 | 3.88E-02 | <i>ZNF804A</i> | 0.178  | 4.32E-02 |
| <i>RARRES3</i>   | 1.069  | 3.89E-02 | <i>LAMB2P1</i> | -0.460 | 4.32E-02 |
| <i>PTPRS</i>     | -0.578 | 3.89E-02 | <i>LST1</i>    | 0.840  | 4.33E-02 |
| <i>PLXDC2</i>    | 0.779  | 3.90E-02 | <i>TINF2</i>   | 0.623  | 4.33E-02 |
| <i>ABCC1</i>     | 0.557  | 3.90E-02 | <i>ANKFY1</i>  | 0.600  | 4.33E-02 |
| <i>SGPP2</i>     | 0.274  | 3.90E-02 | <i>SPOCD1</i>  | 0.520  | 4.33E-02 |
| <i>IL12RB2</i>   | 0.268  | 3.90E-02 | <i>DDB2</i>    | 0.380  | 4.33E-02 |
| <i>CSPP1</i>     | -0.669 | 3.90E-02 | <i>PPAP2C</i>  | -0.390 | 4.33E-02 |
| <i>PPARGC1B</i>  | 0.363  | 3.91E-02 | <i>JUP</i>     | -0.425 | 4.33E-02 |

|                  |        |          |                 |        |          |
|------------------|--------|----------|-----------------|--------|----------|
| <i>PCDHGB7</i>   | -0.416 | 3.91E-02 | <i>MRGPRX2</i>  | -0.437 | 4.33E-02 |
| <i>SRG7</i>      | -0.482 | 3.91E-02 | <i>PPFIA3</i>   | -0.475 | 4.33E-02 |
| <i>HEATR6</i>    | -0.505 | 3.91E-02 | <i>RBMS1</i>    | 0.715  | 4.34E-02 |
| <i>PIK3C2G</i>   | -0.581 | 3.91E-02 | <i>LRRK1</i>    | 0.328  | 4.35E-02 |
| <i>KAT2A</i>     | -0.662 | 3.91E-02 | <i>PNLIPRP3</i> | 0.190  | 4.35E-02 |
| <i>CHFR</i>      | 0.608  | 3.92E-02 | <i>PRSS16</i>   | -0.363 | 4.35E-02 |
| <i>ZNF717</i>    | -0.553 | 3.92E-02 | <i>BATF3</i>    | 0.463  | 4.36E-02 |
| <i>SLX4</i>      | -0.648 | 3.92E-02 | <i>JAKMIP2</i>  | 0.210  | 4.36E-02 |
| <i>TMEM87A</i>   | -0.682 | 3.92E-02 | <i>HOTAIR</i>   | -0.287 | 4.36E-02 |
| <i>NUMA1</i>     | -0.713 | 3.92E-02 | <i>CAMTA1</i>   | -0.343 | 4.36E-02 |
| <i>IRF9</i>      | 1.436  | 3.93E-02 | <i>IRAK1BP1</i> | -0.443 | 4.36E-02 |
| <i>IL33</i>      | 0.494  | 3.93E-02 | <i>CD248</i>    | 0.755  | 4.37E-02 |
| <i>SGCZ</i>      | -0.468 | 3.93E-02 | <i>CD33</i>     | 0.705  | 4.37E-02 |
| <i>LACE1</i>     | -0.442 | 3.94E-02 | <i>RGS4</i>     | 0.643  | 4.37E-02 |
| <i>NACA2</i>     | -0.500 | 3.94E-02 | <i>RUNX1T1</i>  | 0.623  | 4.37E-02 |
| <i>POF1B</i>     | -0.454 | 3.95E-02 | <i>TRAMIL1</i>  | -0.380 | 4.37E-02 |
| <i>KIAA1671</i>  | -0.470 | 3.95E-02 | <i>BCMO1</i>    | -0.395 | 4.37E-02 |
| <i>ZNF35</i>     | -0.490 | 3.95E-02 | <i>PBX1</i>     | -0.438 | 4.37E-02 |
| <i>SRSF6</i>     | -0.615 | 3.95E-02 | <i>GNS</i>      | 0.943  | 4.38E-02 |
| <i>KRT32</i>     | -0.659 | 3.95E-02 | <i>ATP8B2</i>   | 0.478  | 4.38E-02 |
| <i>VASH1</i>     | 0.692  | 3.96E-02 | <i>SLC35G2</i>  | 0.353  | 4.38E-02 |
| <i>CBLN3</i>     | 0.592  | 3.96E-02 | <i>C18orf34</i> | 0.347  | 4.38E-02 |
| <i>GDEP</i>      | -0.585 | 3.96E-02 | <i>BAIAP2</i>   | -0.470 | 4.38E-02 |
| <i>DIP2B</i>     | -0.643 | 3.96E-02 | <i>MSRB3</i>    | 0.680  | 4.39E-02 |
| <i>PPP3CC</i>    | 0.913  | 3.97E-02 | <i>KLF10</i>    | 0.638  | 4.39E-02 |
| <i>TNFRSF10B</i> | 0.600  | 3.97E-02 | <i>TTPA</i>     | -0.348 | 4.39E-02 |
| <i>FAM54B</i>    | -0.650 | 3.97E-02 | <i>C2orf61</i>  | -0.353 | 4.39E-02 |
| <i>REPIN1</i>    | -0.570 | 3.98E-02 | <i>C4orf3</i>   | 0.773  | 4.40E-02 |
| <i>CCDC78</i>    | -0.609 | 3.98E-02 | <i>CXCL10</i>   | 0.520  | 4.40E-02 |
| <i>ANKRD50</i>   | -0.620 | 3.98E-02 | <i>STBD1</i>    | 0.305  | 4.40E-02 |
| <i>FLJ13197</i>  | -0.649 | 3.98E-02 | <i>CALD1</i>    | 0.805  | 4.41E-02 |
| <i>ACOT9</i>     | 0.969  | 3.99E-02 | <i>KDELC2</i>   | 0.650  | 4.41E-02 |
| <i>RASGRP2</i>   | 0.825  | 3.99E-02 | <i>TSPAN11</i>  | 0.377  | 4.41E-02 |
| <i>DGCR2</i>     | -0.563 | 3.99E-02 | <i>IL12RB2</i>  | -0.323 | 4.41E-02 |
| <i>RPL32P3</i>   | -0.590 | 3.99E-02 | <i>TMEM194A</i> | -0.510 | 4.41E-02 |
| <i>RAB8B</i>     | 1.581  | 4.00E-02 | <i>GCH1</i>     | 0.638  | 4.42E-02 |
| <i>DKK1</i>      | 0.414  | 4.00E-02 | <i>ERVW-1</i>   | 0.140  | 4.42E-02 |
| <i>LOC90246</i>  | -0.539 | 4.00E-02 | <i>SELPLG</i>   | 0.890  | 4.43E-02 |
| <i>RASSF9</i>    | 0.472  | 4.01E-02 | <i>CAV2</i>     | 0.650  | 4.43E-02 |
| <i>PDK1</i>      | 0.452  | 4.01E-02 | <i>CALCRL</i>   | 0.550  | 4.43E-02 |
| <i>FAIM2</i>     | -0.669 | 4.01E-02 | <i>PLA2G4C</i>  | 0.450  | 4.43E-02 |
| <i>FCAMR</i>     | 0.423  | 4.02E-02 | <i>TMEM132C</i> | 0.353  | 4.43E-02 |
| <i>STUB1</i>     | -0.752 | 4.02E-02 | <i>NPTX2</i>    | 0.158  | 4.43E-02 |
| <i>UPP1</i>      | 0.865  | 4.03E-02 | <i>PFDN4</i>    | -0.485 | 4.43E-02 |
| <i>SPATS2L</i>   | 0.783  | 4.03E-02 | <i>CDKN1A</i>   | 0.715  | 4.44E-02 |
| <i>GNAI2</i>     | 0.562  | 4.03E-02 | <i>SETD7</i>    | 0.623  | 4.44E-02 |
| <i>PYDC1</i>     | 0.277  | 4.03E-02 | <i>NFKB1</i>    | 0.615  | 4.44E-02 |
| <i>CDH20</i>     | -0.488 | 4.03E-02 | <i>KIAA0930</i> | 0.533  | 4.44E-02 |
| <i>TSNARE1</i>   | -0.628 | 4.03E-02 | <i>ABCG2</i>    | 0.223  | 4.44E-02 |
| <i>DOK3</i>      | 1.007  | 4.04E-02 | <i>DEPDC5</i>   | -0.383 | 4.44E-02 |
| <i>PRRX1</i>     | 0.924  | 4.04E-02 | <i>PLIN1</i>    | 0.610  | 4.45E-02 |

|                  |        |          |                 |        |          |
|------------------|--------|----------|-----------------|--------|----------|
| <i>EGR3</i>      | 0.432  | 4.04E-02 | <i>AMIGO2</i>   | 0.395  | 4.45E-02 |
| <i>LINC00314</i> | -0.453 | 4.04E-02 | <i>EDC3</i>     | -0.438 | 4.45E-02 |
| <i>CXXC4</i>     | -0.473 | 4.04E-02 | <i>DEFB1</i>    | 0.248  | 4.46E-02 |
| <i>RBPMS2</i>    | -0.476 | 4.04E-02 | <i>KCNRG</i>    | -0.307 | 4.46E-02 |
| <i>IRF4</i>      | 0.982  | 4.05E-02 | <i>ZNF711</i>   | -0.423 | 4.46E-02 |
| <i>CHL1</i>      | 0.358  | 4.05E-02 | <i>CRYBG3</i>   | 0.613  | 4.47E-02 |
| <i>KRT6C</i>     | 0.210  | 4.05E-02 | <i>SNX10</i>    | 0.593  | 4.47E-02 |
| <i>SNORA74A</i>  | -0.594 | 4.05E-02 | <i>PLN</i>      | 0.453  | 4.47E-02 |
| <i>SNTA1</i>     | -0.704 | 4.05E-02 | <i>KIAA0125</i> | 0.383  | 4.47E-02 |
| <i>EPB41L2</i>   | 0.723  | 4.06E-02 | <i>CBFA2T3</i>  | 0.240  | 4.47E-02 |
| <i>SIRPB1</i>    | 0.720  | 4.06E-02 | <i>ARX</i>      | 0.160  | 4.47E-02 |
| <i>TRIM47</i>    | 0.762  | 4.07E-02 | <i>IPPK</i>     | -0.390 | 4.47E-02 |
| <i>B3GNT5</i>    | 0.660  | 4.07E-02 | <i>LLGL2</i>    | -0.425 | 4.47E-02 |
| <i>CLIC5</i>     | 0.565  | 4.07E-02 | <i>PPM1M</i>    | 0.770  | 4.48E-02 |
| <i>GRHL3</i>     | 0.402  | 4.07E-02 | <i>SLC35G3</i>  | -0.293 | 4.48E-02 |
| <i>PLCE1</i>     | -0.471 | 4.07E-02 | <i>ZKSCAN2</i>  | -0.343 | 4.48E-02 |
| <i>ZNF471</i>    | -0.493 | 4.07E-02 | <i>ANKRD16</i>  | -0.427 | 4.48E-02 |
| <i>ZNF101</i>    | 0.539  | 4.08E-02 | <i>LIG3</i>     | -0.455 | 4.48E-02 |
| <i>MOXD1</i>     | 0.710  | 4.09E-02 | <i>HIST1H4C</i> | -0.465 | 4.48E-02 |
| <i>KAT8</i>      | -0.561 | 4.09E-02 | <i>TIPIN</i>    | -0.540 | 4.48E-02 |
| <i>GSTZ1</i>     | -0.615 | 4.09E-02 | <i>MYCBP2</i>   | 0.788  | 4.49E-02 |
| <i>LY9</i>       | 1.059  | 4.10E-02 | <i>NUAK1</i>    | 0.558  | 4.49E-02 |
| <i>NAT8L</i>     | -0.570 | 4.10E-02 | <i>PDE1A</i>    | 0.468  | 4.49E-02 |
| <i>NELL1</i>     | -0.584 | 4.10E-02 | <i>GNLY</i>     | 0.410  | 4.49E-02 |
| <i>AGBL5</i>     | -0.627 | 4.10E-02 | <i>TRIM69</i>   | 0.327  | 4.49E-02 |
| <i>C17orf61</i>  | -0.643 | 4.10E-02 | <i>KCNMB4</i>   | 0.273  | 4.49E-02 |
| <i>STARD10</i>   | -0.651 | 4.10E-02 | <i>FOXD2</i>    | -0.403 | 4.49E-02 |
| <i>ARHGAP27</i>  | 0.837  | 4.11E-02 | <i>FZD9</i>     | -0.520 | 4.49E-02 |
| <i>C11orf87</i>  | -0.474 | 4.11E-02 | <i>PPIC</i>     | 0.640  | 4.50E-02 |
| <i>ADIG</i>      | -0.719 | 4.11E-02 | <i>CXCL2</i>    | 0.470  | 4.50E-02 |
| <i>CHD5</i>      | -0.726 | 4.11E-02 | <i>UBE2E2</i>   | 0.440  | 4.50E-02 |
| <i>C19orf66</i>  | 1.233  | 4.12E-02 | <i>DCLK1</i>    | 0.418  | 4.50E-02 |
| <i>SEPT1</i>     | 0.704  | 4.12E-02 | <i>GXYLT2</i>   | 0.407  | 4.50E-02 |
| <i>BDH1</i>      | -0.595 | 4.13E-02 | <i>EBF3</i>     | 0.280  | 4.50E-02 |
| <i>TELO2</i>     | -0.776 | 4.13E-02 | <i>SLC26A3</i>  | 0.153  | 4.50E-02 |
| <i>MEOX2</i>     | 0.348  | 4.14E-02 | <i>PI4K2A</i>   | 0.560  | 4.51E-02 |
| <i>TIFA</i>      | 0.645  | 4.15E-02 | <i>ANKH</i>     | 0.288  | 4.51E-02 |
| <i>FAM129C</i>   | 0.514  | 4.15E-02 | <i>INPP5D</i>   | 0.630  | 4.52E-02 |
| <i>KSR2</i>      | -0.540 | 4.15E-02 | <i>RNF144A</i>  | 0.328  | 4.52E-02 |
| <i>TRIM25</i>    | 0.648  | 4.16E-02 | <i>PDGFA</i>    | 0.248  | 4.52E-02 |
| <i>CCDC65</i>    | -0.497 | 4.16E-02 | <i>CCDC138</i>  | -0.517 | 4.52E-02 |
| <i>CRLF1</i>     | -0.538 | 4.16E-02 | <i>FNIP2</i>    | 0.557  | 4.53E-02 |
| <i>MAN2A2</i>    | -0.588 | 4.16E-02 | <i>LRRC33</i>   | 0.440  | 4.53E-02 |
| <i>ARRDC2</i>    | 0.801  | 4.17E-02 | <i>ITGB6</i>    | 0.278  | 4.53E-02 |
| <i>SLC24A4</i>   | 0.406  | 4.17E-02 | <i>FBXL7</i>    | 0.530  | 4.54E-02 |
| <i>MB21D2</i>    | 0.353  | 4.17E-02 | <i>TMEM2</i>    | 0.493  | 4.54E-02 |
| <i>BTRC</i>      | -0.497 | 4.17E-02 | <i>MZB1</i>     | 0.465  | 4.54E-02 |
| <i>STK4</i>      | 0.879  | 4.18E-02 | <i>ANXA2R</i>   | 0.277  | 4.54E-02 |
| <i>GJA5</i>      | 0.606  | 4.18E-02 | <i>TOP2A</i>    | -0.530 | 4.54E-02 |
| <i>KRT6A</i>     | 0.464  | 4.18E-02 |                 |        |          |
| <i>CCDC67</i>    | -0.492 | 4.18E-02 |                 |        |          |

|                   |        |          |
|-------------------|--------|----------|
| <i>INADL</i>      | -0.551 | 4.18E-02 |
| <i>ARHGEF25</i>   | -0.564 | 4.18E-02 |
| <i>HECW2</i>      | 0.449  | 4.19E-02 |
| <i>EID3</i>       | 0.323  | 4.19E-02 |
| <i>CCBE1</i>      | 0.463  | 4.21E-02 |
| <i>GPR82</i>      | 0.337  | 4.21E-02 |
| <i>GJA9</i>       | -0.533 | 4.21E-02 |
| <i>CSNK1E</i>     | -0.601 | 4.21E-02 |
| <i>NCEH1</i>      | 0.982  | 4.22E-02 |
| <i>AKIRIN2</i>    | 0.823  | 4.22E-02 |
| <i>ZNFX1</i>      | 1.387  | 4.23E-02 |
| <i>PPAP2B</i>     | 0.747  | 4.23E-02 |
| <i>ARHGAP26</i>   | 0.568  | 4.23E-02 |
| <i>FILIP1</i>     | 0.415  | 4.23E-02 |
| <i>CD40LG</i>     | 0.914  | 4.24E-02 |
| <i>TNFSF14</i>    | 0.802  | 4.24E-02 |
| <i>ZAP70</i>      | 0.961  | 4.25E-02 |
| <i>NECAB1</i>     | 0.169  | 4.25E-02 |
| <i>RPAP1</i>      | -0.603 | 4.25E-02 |
| <i>CSDA</i>       | 0.461  | 4.26E-02 |
| <i>PARM1</i>      | 0.457  | 4.26E-02 |
| <i>SLC6A14</i>    | 0.243  | 4.26E-02 |
| <i>PROK2</i>      | 0.216  | 4.26E-02 |
| <i>AK7</i>        | -0.466 | 4.26E-02 |
| <i>GLB1L2</i>     | -0.489 | 4.26E-02 |
| <i>ZNF214</i>     | -0.532 | 4.26E-02 |
| <i>TECPR2</i>     | -0.581 | 4.26E-02 |
| <i>DPYD</i>       | 1.384  | 4.27E-02 |
| <i>BTN2A1</i>     | 0.778  | 4.27E-02 |
| <i>CPT1A</i>      | -0.392 | 4.27E-02 |
| <i>BEND2</i>      | -0.456 | 4.27E-02 |
| <i>SERPINA1</i>   | 0.837  | 4.28E-02 |
| <i>CAMSAP3</i>    | -0.687 | 4.28E-02 |
| <i>DOK2</i>       | 1.268  | 4.29E-02 |
| <i>CREM</i>       | 0.645  | 4.29E-02 |
| <i>ALPK1</i>      | 0.955  | 4.30E-02 |
| <i>RNASE2</i>     | 0.637  | 4.30E-02 |
| <i>TRIM36</i>     | -0.451 | 4.30E-02 |
| <i>RGS16</i>      | 0.493  | 4.31E-02 |
| <i>TNFSF9</i>     | 0.365  | 4.31E-02 |
| <i>PPARGC1A</i>   | -0.480 | 4.31E-02 |
| <i>PRR15L</i>     | -0.563 | 4.31E-02 |
| <i>KIAA1737</i>   | -0.653 | 4.31E-02 |
| <i>STAT2</i>      | 1.131  | 4.32E-02 |
| <i>SLC8A1</i>     | 0.953  | 4.32E-02 |
| <i>SAPCD1</i>     | -0.645 | 4.32E-02 |
| <i>AQP9</i>       | 0.928  | 4.33E-02 |
| <i>ARMC9</i>      | -0.428 | 4.33E-02 |
| <i>ST6GALNAC2</i> | -0.499 | 4.33E-02 |
| <i>ZSCAN2</i>     | -0.524 | 4.33E-02 |
| <i>ABHD12</i>     | -0.556 | 4.33E-02 |



|                  |        |          |
|------------------|--------|----------|
| <i>CLEC4F</i>    | -0.564 | 4.33E-02 |
| <i>FGF19</i>     | -0.584 | 4.33E-02 |
| <i>FLJ44342</i>  | -0.662 | 4.33E-02 |
| <i>LINC00589</i> | -0.683 | 4.33E-02 |
| <i>C11orf35</i>  | -0.720 | 4.33E-02 |
| <i>BACE2</i>     | 0.404  | 4.34E-02 |
| <i>CA12</i>      | -0.504 | 4.34E-02 |
| <i>CXCL12</i>    | 0.881  | 4.35E-02 |
| <i>KCNJ10</i>    | 0.816  | 4.35E-02 |
| <i>ENPP6</i>     | 0.188  | 4.35E-02 |
| <i>FGFRL1</i>    | -0.619 | 4.35E-02 |
| <i>IFI27L2</i>   | 0.827  | 4.36E-02 |
| <i>LMO4</i>      | 0.295  | 4.36E-02 |
| <i>VEGFC</i>     | 0.744  | 4.37E-02 |
| <i>S100A9</i>    | 0.697  | 4.37E-02 |
| <i>BEND7</i>     | -0.455 | 4.37E-02 |
| <i>IL17D</i>     | -0.528 | 4.37E-02 |
| <i>METRN</i>     | -0.689 | 4.37E-02 |
| <i>CD68</i>      | 1.063  | 4.38E-02 |
| <i>TBC1D1</i>    | 0.411  | 4.38E-02 |
| <i>SPIC</i>      | 0.059  | 4.38E-02 |
| <i>SPATA6L</i>   | -0.482 | 4.38E-02 |
| <i>BEST3</i>     | -0.528 | 4.38E-02 |
| <i>RNF141</i>    | -0.631 | 4.38E-02 |
| <i>ABCA1</i>     | 0.931  | 4.39E-02 |
| <i>RAB7L1</i>    | 0.599  | 4.39E-02 |
| <i>POLH</i>      | -0.481 | 4.39E-02 |
| <i>IPW</i>       | -0.637 | 4.39E-02 |
| <i>CPM</i>       | 0.421  | 4.40E-02 |
| <i>PGAP2</i>     | -0.578 | 4.40E-02 |
| <i>CDC42BPB</i>  | -0.599 | 4.40E-02 |
| <i>XIRP1</i>     | 0.807  | 4.41E-02 |
| <i>GABRG1</i>    | -0.501 | 4.41E-02 |
| <i>TMEM201</i>   | -0.671 | 4.41E-02 |
| <i>ABI3BP</i>    | 0.760  | 4.42E-02 |
| <i>ZNF625</i>    | -0.459 | 4.42E-02 |
| <i>CMYA5</i>     | -0.556 | 4.42E-02 |
| <i>KRTAP17-1</i> | -0.691 | 4.43E-02 |
| <i>BLK</i>       | 0.487  | 4.44E-02 |
| <i>C15orf26</i>  | -0.424 | 4.44E-02 |
| <i>FAM81A</i>    | -0.474 | 4.44E-02 |
| <i>MIR600HG</i>  | -0.609 | 4.44E-02 |
| <i>DACT1</i>     | 0.499  | 4.45E-02 |
| <i>FAM9B</i>     | -0.432 | 4.45E-02 |
| <i>RASSF8</i>    | -0.454 | 4.45E-02 |
| <i>C9orf24</i>   | -0.584 | 4.45E-02 |
| <i>KLHDC10</i>   | -0.498 | 4.46E-02 |
| <i>ACSL4</i>     | 1.153  | 4.47E-02 |
| <i>NUS1</i>      | 0.582  | 4.47E-02 |
| <i>RBPJ</i>      | 0.552  | 4.47E-02 |
| <i>ATP11A</i>    | 0.398  | 4.47E-02 |

|                  |        |          |
|------------------|--------|----------|
| <i>SPCS3</i>     | 1.165  | 4.48E-02 |
| <i>KCNT2</i>     | 0.591  | 4.48E-02 |
| <i>GNL1</i>      | -0.530 | 4.48E-02 |
| <i>S100A4</i>    | 0.894  | 4.49E-02 |
| <i>ADPRH</i>     | 0.747  | 4.49E-02 |
| <i>ZNF804A</i>   | 0.251  | 4.50E-02 |
| <i>M6PR</i>      | 1.064  | 4.51E-02 |
| <i>RGL1</i>      | 1.003  | 4.51E-02 |
| <i>KLHL29</i>    | 0.392  | 4.51E-02 |
| <i>TMEM232</i>   | -0.456 | 4.51E-02 |
| <i>SULF1</i>     | 0.916  | 4.52E-02 |
| <i>ING1</i>      | 0.328  | 4.52E-02 |
| <i>C1orf101</i>  | -0.538 | 4.52E-02 |
| <i>PPM1J</i>     | -0.552 | 4.52E-02 |
| <i>MID2</i>      | -0.592 | 4.52E-02 |
| <i>PPP2R2B</i>   | 0.302  | 4.53E-02 |
| <i>TEKT2</i>     | -0.560 | 4.53E-02 |
| <i>C10orf116</i> | -0.574 | 4.53E-02 |
| <i>STK10</i>     | 1.217  | 4.54E-02 |
| <i>LPAR6</i>     | 0.946  | 4.54E-02 |
| <i>CYFIP2</i>    | 0.602  | 4.54E-02 |
| <i>CRIP2</i>     | -0.589 | 4.54E-02 |
| <i>NUDT14</i>    | -0.628 | 4.54E-02 |
| <i>ADAMTS18</i>  | -0.630 | 4.54E-02 |

---

**Supplementary Table 6.** Univariate Cox regression analysis of AXL and CD163 for relapse-free survival and overall survival in triple-negative breast cancer (N = 203).

| <i>Variable</i>              | <i>HR</i> | <i>95% CI</i> | <i>P-value</i> <sup>a</sup> | <i>HR</i> | <i>95% CI</i> | <i>P-value</i> <sup>a</sup> |
|------------------------------|-----------|---------------|-----------------------------|-----------|---------------|-----------------------------|
| <i>Relapse-Free Survival</i> |           |               | <i>Overall Survival</i>     |           |               |                             |
| AXL                          | 3.19      | 1.66 – 6.14   | <b>5.00E-04</b>             | 3.16      | 1.64 – 6.08   | <b>6.00E-04</b>             |
| CD163                        | 2.02      | 1.06 – 3.85   | <b>3.29E-02</b>             | 1.75      | 0.92 – 3.31   | 8.65E-02                    |

Abbreviations: CI, Confidence interval; HR, Hazard ratio.

<sup>a</sup>Significant *P*-values are given in bold.

**Supplementary Table 7.** Multivariate Cox regression analysis of AXL for relapse-free survival and overall survival in the validation cohort of triple-negative breast cancer (N = 95)

| <i>Variable</i> | <i>HR</i>                    | <i>95% CI</i> | <i>P-value</i> <sup>a</sup> | <i>HR</i>               | <i>95% CI</i> | <i>P-value</i> <sup>a</sup> |
|-----------------|------------------------------|---------------|-----------------------------|-------------------------|---------------|-----------------------------|
|                 | <i>Relapse-Free Survival</i> |               |                             | <i>Overall Survival</i> |               |                             |
| AXL             | 6.05                         | 1.93 – 18.72  | <b>1.80E-03</b>             | 6.09                    | 2.12 – 17.54  | <b>8.00E-04</b>             |
| Age             | 0.87                         | 0.32 – 2.36   | 7.86E-01                    | 0.89                    | 0.35 – 2.25   | 8.01E-01                    |
| Grade           | 1.54                         | 0.42 – 5.57   | 5.12E-01                    | 2.01                    | 0.55 – 7.32   | 2.90E-01                    |
| Nodal status    | 5.96                         | 1.16 – 30.57  | <b>3.20E-02</b>             | 3.99                    | 1.05 – 15.19  | <b>4.20E-02</b>             |
| Tumor size      | 1.69                         | 0.63 – 4.54   | 2.96E-01                    | 1.43                    | 0.53 – 3.85   | 4.76E-01                    |
| Tumor stage     | 1.12                         | 0.36 – 3.51   | 8.44E-01                    | 1.01                    | 0.31 – 3.21   | 9.93E-01                    |

Abbreviations: CI, Confidence interval; HR, Hazard ratio.

<sup>a</sup>Significant *P*-values are given in bold.

**Supplementary Table 8.** Multivariate Cox regression analysis of AXL evaluated as a continuous variable for relapse-free survival and overall survival in the discovery (N = 203) and validation (N = 95) cohort of triple-negative breast cancer.

| <i>Variable</i>              | <i>HR</i> | <i>95% CI</i> | <i>P-value<sup>a</sup></i> | <i>HR</i> | <i>95% CI</i> | <i>P-value<sup>a</sup></i> |
|------------------------------|-----------|---------------|----------------------------|-----------|---------------|----------------------------|
| <i>Relapse-Free Survival</i> |           |               | <i>Overall Survival</i>    |           |               |                            |
| <b>Discovery cohort</b>      |           |               |                            |           |               |                            |
| AXL                          | 1.25      | 1.07 – 1.46   | <b>3.39E-03</b>            | 1.32      | 1.13 – 1.53   | <b>5.00E-04</b>            |
| Age                          | 0.95      | 0.50 – 1.82   | 8.81E-01                   | 1.09      | 0.57 – 2.07   | 8.05E-01                   |
| Grade                        | 1.60      | 0.65 – 3.90   | 3.04E-01                   | 1.93      | 0.78 – 4.74   | 1.54E-01                   |
| Nodal status                 | 2.67      | 1.07 – 6.67   | <b>3.49E-02</b>            | 1.37      | 0.61 – 3.08   | 4.42E-01                   |
| Tumor size                   | 1.51      | 0.78 – 2.91   | 2.18E-01                   | 1.14      | 0.60 – 2.17   | 6.91E-01                   |
| Tumor stage                  | 1.71      | 0.80 – 3.68   | 1.66E-01                   | 1.22      | 0.52 – 2.87   | 6.49E-01                   |
| <b>Validation cohort</b>     |           |               |                            |           |               |                            |
| AXL                          | 1.42      | 1.12 – 1.81   | <b>4.44E-03</b>            | 1.44      | 1.13 – 1.83   | <b>3.00E-03</b>            |
| Age                          | 1.20      | 0.44 – 3.30   | 7.23E-01                   | 1.24      | 0.47 – 3.26   | 6.65E-01                   |
| Grade                        | 1.54      | 0.42 – 5.62   | 5.14E-01                   | 1.91      | 0.53 – 6.97   | 3.25E-01                   |
| Nodal status                 | 5.65      | 1.06 – 30.24  | <b>4.30E-02</b>            | 3.44      | 0.88 – 13.42  | 7.58E-02                   |
| Tumor size                   | 1.47      | 0.51 – 4.27   | 4.78E-01                   | 1.20      | 0.43 – 3.35   | 7.34E-01                   |
| Tumor stage                  | 0.97      | 0.32 – 2.93   | 9.52E-01                   | 0.88      | 0.29 – 2.65   | 8.23E-01                   |

Abbreviations: CI, Confidence Interval; HR, Hazard Ratio.

<sup>a</sup>Significant *P*-values (Fisher's exact test) are given in bold.

Multivariate analysis adjusted for age ( $\geq 50$  v  $< 50$ ), histological grade (G3 v G1-2), nodal status (1 v 0), tumor size ( $> 20$  mm v  $\leq 20$  mm), and tumor stage (III v I-II).

**Supplementary Table 9.** List of TaqMan gene expression assays used in this study.

| <i>Assay ID</i> | <i>Gene Symbol</i> | <i>Gene Name</i>                                                           |
|-----------------|--------------------|----------------------------------------------------------------------------|
| Hs00178289_m1   | <i>AKT1</i>        | v-akt murine thymoma viral oncogene homolog 1                              |
| Hs01086102_m1   | <i>AKT2</i>        | v-akt murine thymoma viral oncogene homolog 2                              |
| Hs01064444_m1   | <i>AXL</i>         | AXL receptor tyrosine kinase                                               |
| Hs00234140_m1   | <i>CCL2</i>        | chemokine (C-C motif) ligand 2                                             |
| Hs00174575_m1   | <i>CCL5</i>        | chemokine (C-C motif) ligand 5                                             |
| Hs01023894_m1   | <i>CDH1</i>        | E- cadherin                                                                |
| Hs00174164_m1   | <i>CSF1</i>        | colony stimulating factor 1                                                |
| Hs00171266_m1   | <i>CSF2</i>        | colony stimulating factor 2                                                |
| Hs00171042_m1   | <i>CXCL10</i>      | chemokine (C-X-C motif) ligand 10                                          |
| Hs01058430_m1   | <i>DDR1</i>        | discoidin domain receptor tyrosine kinase 1                                |
| Hs01025953_m1   | <i>DDR2</i>        | discoidin domain receptor tyrosine kinase 2                                |
| Hs01076078_m1   | <i>EGFR</i>        | epidermal growth factor receptor                                           |
| Hs00946872_m1   | <i>ERK1</i>        | mitogen-activated protein kinase 3                                         |
| Hs01046830_m1   | <i>ERK2</i>        | mitogen-activated protein kinase 1                                         |
| Hs01056457_m1   | <i>FAK</i>         | protein tyrosine kinase 2                                                  |
| Hs00915142_m1   | <i>FGFR1</i>       | fibroblast growth factor receptor 1                                        |
| Hs01552926_m1   | <i>FGFR2</i>       | fibroblast growth factor receptor 2                                        |
| Hs00179829_m1   | <i>FGFR3</i>       | fibroblast growth factor receptor 3                                        |
| Hs00941600_m1   | <i>FYN</i>         | FYN oncogene related to SRC                                                |
| Hs02758991_g1   | <i>GAPDH</i>       | glyceraldehyde-3-phosphate dehydrogenase                                   |
| Hs01047719_m1   | <i>GSK3B</i>       | glycogen synthase kinase 3 beta                                            |
| Hs00174143_m1   | <i>IFNG</i>        | interferon gamma                                                           |
| Hs00609566_m1   | <i>IGF1R</i>       | insulin-like growth factor 1 receptor                                      |
| Hs00989502_m1   | <i>IKKA</i>        | conserved helix-loop-helix ubiquitous kinase                               |
| Hs00233287_m1   | <i>IKKB</i>        | inhibitor of kappa light polypeptide gene enhancer in B-cells, kinase beta |
| Hs00174086_m1   | <i>IL10</i>        | interleukin 10                                                             |
| Hs00174379_m1   | <i>IL13</i>        | interleukin 13                                                             |
| Hs00174122_m1   | <i>IL4</i>         | interleukin 4                                                              |
| Hs00174131_m1   | <i>IL6</i>         | interleukin 6                                                              |
| Hs00174103_m1   | <i>IL8</i>         | interleukin 8                                                              |
| Hs00176719_m1   | <i>LYN</i>         | LYN proto-oncogene, Src family tyrosine kinase                             |
| Hs00361185_m1   | <i>KRT5</i>        | keratin 5, type II                                                         |
| Hs04194231_s1   | <i>KRT6A</i>       | keratin 6A, type II                                                        |
| Hs01565584_m1   | <i>MET</i>         | met proto-oncogene                                                         |
| Hs00968300_g1   | <i>OSM</i>         | oncostatin M                                                               |
| Hs00998018_m1   | <i>PDGFRA</i>      | platelet-derived growth factor receptor, alpha polypeptide                 |
| Hs01019589_m1   | <i>PDGFRB</i>      | platelet-derived growth factor receptor, beta polypeptide                  |
| Hs00169444_m1   | <i>PTK2B</i>       | protein tyrosine kinase 2 beta                                             |

|               |                |                                                  |
|---------------|----------------|--------------------------------------------------|
| Hs01082246_m1 | <i>SRC</i>     | SRC proto-oncogene, non-receptor tyrosine kinase |
| Hs00895377_m1 | <i>SYK</i>     | spleen tyrosine kinase                           |
| Hs00171257_m1 | <i>TGFB1</i>   | transforming growth factor beta 1                |
| Hs00234244_m1 | <i>TGFB2</i>   | transforming growth factor beta 2                |
| Hs00610320_m1 | <i>TGFBRI</i>  | transforming growth factor, beta receptor 1      |
| Hs00234253_m1 | <i>TGFBRII</i> | transforming growth factor, beta receptor 2      |
| Hs01052961_m1 | <i>VEGFR1</i>  | fms-related tyrosine kinase 1                    |
| Hs00911700_m1 | <i>VEGFR2</i>  | kinase insert domain receptor                    |
| Hs01047677_m1 | <i>VEGFR3</i>  | fms-related tyrosine kinase 4                    |
| Hs00185584_m1 | <i>VIM</i>     | vimentin                                         |
| Hs01080045_g1 | <i>YES1</i>    | YES proto-oncogene 1, Src family tyrosine kinase |

---
