# Supplementary material for: AXL-associated tumor inflammation as a poor prognostic signature in chemotherapy-treated triple-negative breast cancer patients
Source: PubMed Central journal article supplement (PMC5515347; doi:10.1038/npjbcancer.2016.33), 2016-11-02
Supplement: npjbcancer201633-s3.pdf [file npjbcancer201633-s3.pdf]

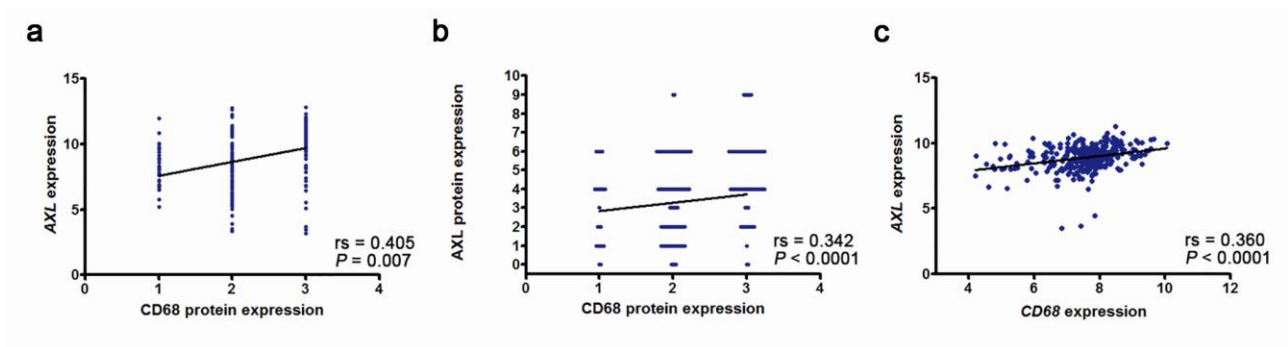

**Supplementary Figure 1. AXL expression correlates with CD68 expression in triple-negative breast cancer.** a) Correlation analysis between *AXL* gene expression and CD68 protein in the internal cohort of 203 TNBC (Spearman's coefficient,  $rs = 0.405$ ; Bonferroni adjusted  $P = 0.007$ ). b) A scatter diagram showing the positive correlation between immunohistochemical staining of AXL and CD163 proteins in TNBC ( $N = 203$ ) ( $rs = 0.342$ ;  $P < 0.0001$ ). c) Correlation analysis between the expression of *AXL* and *CD68* performed on gene expression data from 3 publicly available TNBC datasets ( $N = 311$ ) ( $rs = 0.360$ ;  $P < 0.0001$ ).

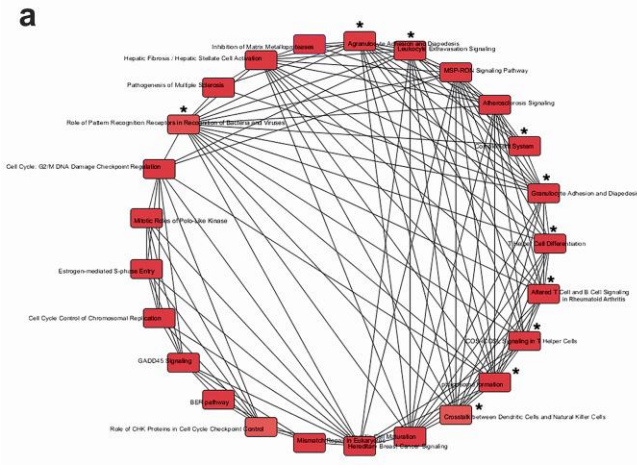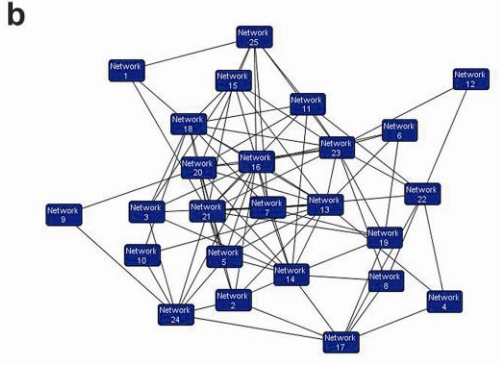

- Network 1 Hematological Disease, Infectious Diseases, Organismal Injury and Abnormalities
- Network 2 Antimicrobial Response, Inflammatory Response, Infectious Diseases
- Network 3 Cell-To-Cell Signaling and Interaction, Hematological System Development and Function, Immune Cell Trafficking
- Network 4 Cell-To-Cell Signaling and Interaction, Hematological System Development and Function, Immune Cell Trafficking
- Network 5 Cell-To-Cell Signaling and Interaction, Hematological System Development and Function, Immune Cell Trafficking
- Network 6 Lipid Metabolism, Molecular Transport, Small Molecule Biochemistry
- Network 7 Endocrine System Disorders, Gastrointestinal Disease, Immunological Disease
- Network 8 Hematological System Development and Function, Tissue Morphology, Lymphoid Tissue Structure and Development
- Network 9 Cellular Assembly and Organization, Cellular Function and Maintenance, Protein Degradation
- Network 10 Cell-To-Cell Signaling and Interaction, Hematological System Development and Function, Immune Cell Trafficking
- Network 11 Cellular Movement, Immune Cell Trafficking, Hematological System Development and Function
- Network 12 Developmental Disorder, Hereditary Disorder, Neurological Disease
- Network 13 Immunological Disease, Endocrine System Disorders, Gastrointestinal Disease
- Network 14 Antimicrobial Response, Inflammatory Response, Infectious Diseases
- Network 15 Cell Death and Survival, Dermatological Diseases and Conditions, Cancer
- Network 16 Antimicrobial Response, Inflammatory Response, Infectious Diseases
- Network 17 Hereditary Disorder, Neurological Disease, Organismal Injury and Abnormalities
- Network 18 Inflammatory Response, Cell-To-Cell Signaling and Interaction, Cellular Growth and Proliferation
- Network 19 Cellular Development, Hematological System Development and Function, Hematopoiesis
- Network 20 Cell Death and Survival, Embryonic Development, Organismal Development
- Network 21 Cellular Function and Maintenance, Hematological System Development and Function, Immune Cell Trafficking
- Network 22 Cardiac Arteriosclerosis, Cardiovascular Disease, Organismal Injury and Abnormalities
- Network 23 Cell Death and Survival, Gene Expression, Organismal Development
- Network 24 Cellular Growth and Proliferation, Cellular Development, Hematological System Development and Function
- Network 25 Cellular Assembly and Organization, Cellular Function and Maintenance, Cellular Growth and Proliferation

**c**

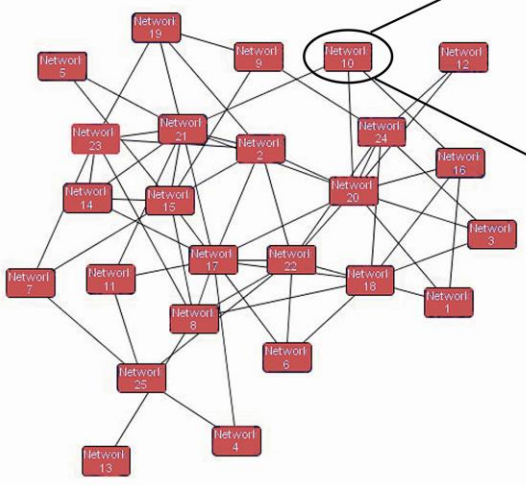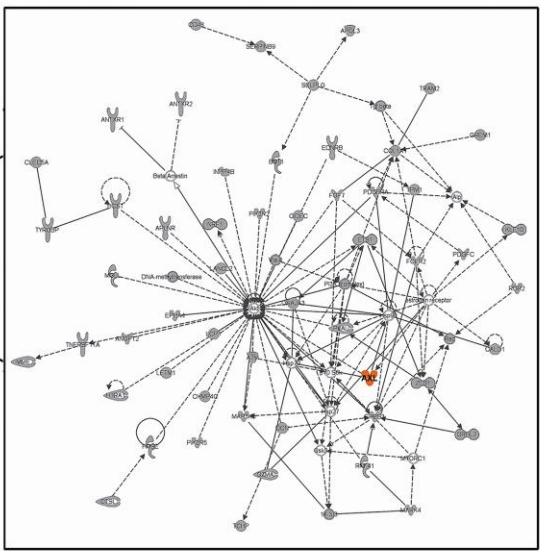

- Network 1 Cellular Development, Hematological System Development and Function, Hematopoiesis
- Network 2 Cell Death and Survival, Cell Cycle, DNA Replication, Recombination, and Repair
- Network 3 Cardiovascular Disease, Developmental Disorder, Hematological Disease
- Network 4 Cellular Movement, Cell Morphology, Cellular Growth and Proliferation
- Network 5 Lipid Metabolism, Molecular Transport, Small Molecule Biochemistry
- Network 6 Cellular Movement, Cardiovascular System Development and Function, Organismal Development
- Network 7 Cellular Function and Maintenance, Cellular Growth and Proliferation, Hematological System Development and Function
- Network 8 Cellular Movement, Immune Cell Trafficking, Cellular Function and Maintenance
- Network 9 Cancer, Organismal Injury and Abnormalities, Cell Death and Survival
- Network 10 Cellular Movement, Cell Death and Survival, Cellular Development
- Network 11 Cellular Movement, Cell Morphology, Cellular Assembly and Organization
- Network 12 Cancer, Connective Tissue Disorders, Developmental Disorder
- Network 13 Developmental Disorder, Hereditary Disorder, Metabolic Disease
- Network 14 Cell-To-Cell Signaling and Interaction, Hematological System Development and Function, Immune Cell Trafficking
- Network 15 Cellular Movement, Hematological System Development and Function, Immune Cell Trafficking
- Network 16 Hereditary Disorder, Neurological Disease, Organismal Injury and Abnormalities
- Network 17 Gene Expression, Cancer, Cell Death and Survival
- Network 18 Cell Death and Survival, Cellular Movement, Cancer
- Network 19 Cell Death and Survival, Post-Translational Modification, Protein Degradation
- Network 20 Cellular Growth and Proliferation, Cell Cycle, Cellular Development
- Network 21 RNA Post-Transcriptional Modification, Developmental Disorder, Neurological Disease
- Network 22 Gene Expression, Cell Cycle, Cell Morphology
- Network 23 Cellular Function and Maintenance, Hematological System Development and Function, Lymphoid Tissue Structure and Development
- Network 24 Cardiovascular System Development and Function, Cellular Assembly and Organization, DNA Replication, Recombination, and Repair
- Network 25 Cellular Movement, Cancer, Organismal Injury and Abnormalities

**Supplementary Figure 2.** AXL is involved in a gene network regulating tumor immune response and M2 macrophages. a) Pathway analysis of genes co-expressed with AXL in triple negative breast cancer. Co-regulated genes were identified using the SEEK platform, and pathway analysis was performed with IPA. *P*-values for pathway enrichment were adjusted for multiple testing using the Benjamini-Hochberg correction. Immune pathways were indicated with an asterisk (\*). b, c) The images represent the top networks identified with IPA software for the genes significantly co-expressed ( $P < 0.01$ ) with the immune modules reflecting the polarization of M1 (b) or M2 (c) macrophages. As evidenced in (c), *AXL* was present in the signaling network associated with the M2-related module only.

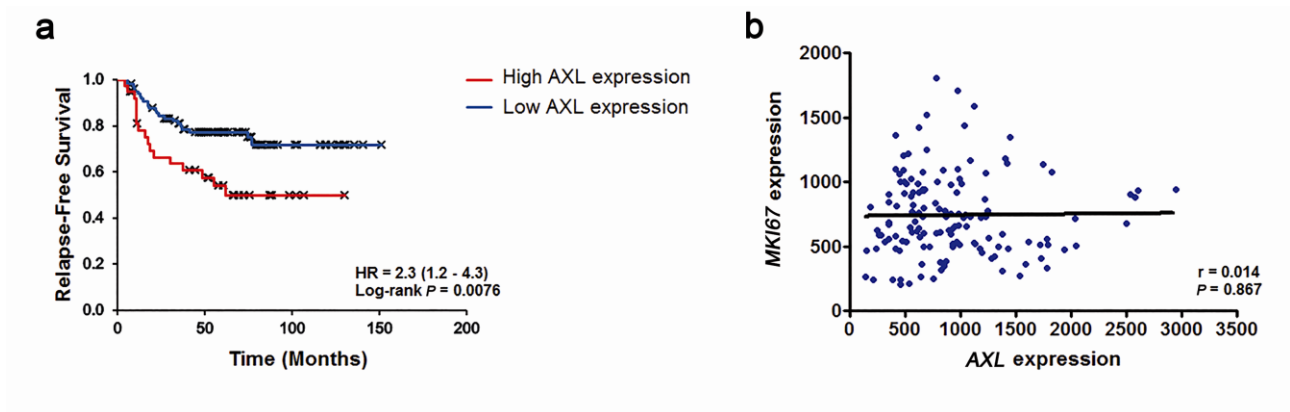

**Supplementary Figure 3. *AXL* expression is predictive of relapse-free survival independently of proliferation in adjuvant chemotherapy treated triple-negative breast cancers.** a) Kaplan-Meier analysis for relapse-free survival according to *AXL* expression in 137 TNBC treated with adjuvant chemotherapy. The median expression value of *AXL* was used as cutoff. b) Pearson's correlation analysis showing that *AXL* expression does not correlate with the expression of *MKI67* ( $r = 0.014$ ).

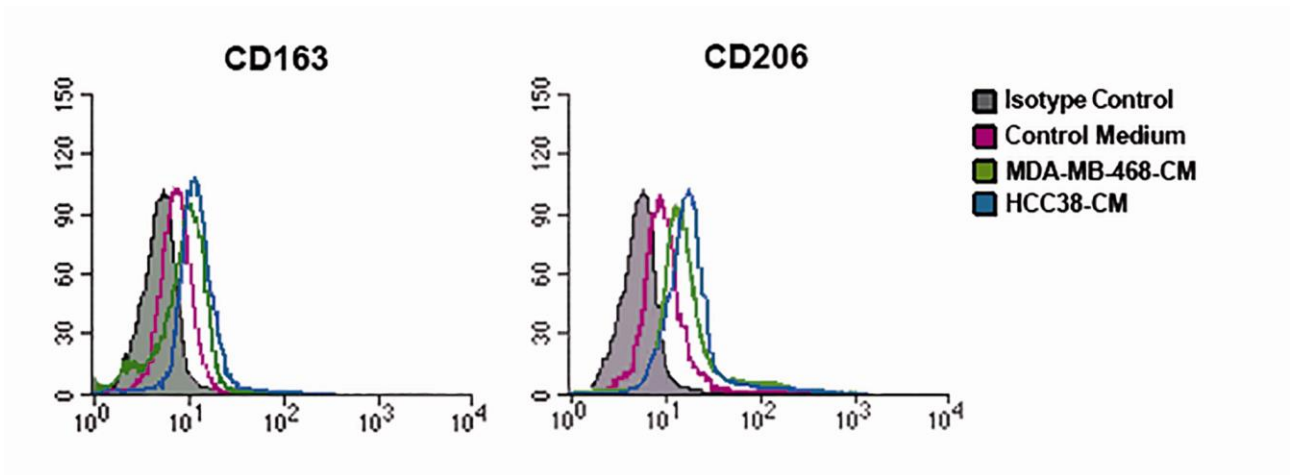

**Supplementary Figure 4. Effects of *AXL*-overexpressing basal-like breast cancer cells on the polarization of M2 macrophages.** Flow cytometric analysis of the M2 markers CD163 and CD206 in human monocytes cultured in the absence (pink) or presence of *AXL*-expressing basal-like HCC38-conditioned medium (CM) (blue), and *AXL*-negative basal-like MDA-MB-468-CM (green) for 6 days. Gray histograms represent staining with isotype controls. The histograms are representatives of five independent experiments.
